# Supplementary material
Source: PubMed Central journal article supplement (PMC7963077)
Supplement: bioinformatics_35_5_787_s5.pdf [file bioinformatics_35_5_787_s5.pdf]

Supplementary Materials for  
*PairedFB: a full hierarchical Bayesian model for paired  
 RNA-seq data with heterogeneous treatment effects*

Yuanyuan Bian<sup>1</sup>, Chong He<sup>1</sup>, Jie Hou<sup>2</sup>, Jianlin Cheng<sup>2</sup>, and Jing Qiu<sup>\*3</sup>

<sup>1</sup>Department of Statistics, University of Missouri, Columbia, Missouri, 65211.

<sup>2</sup>Department of Electrical Engineering and Computer Science, University of  
 Missouri, Columbia, Missouri, 65211.

<sup>3</sup>Department of Applied Economics and Statistics, University of Delaware,  
 Newark, Delaware, 19716.

## Contents

|          |                                                                                                         |          |
|----------|---------------------------------------------------------------------------------------------------------|----------|
| <b>1</b> | <b>Supplementary Discussion</b>                                                                         | <b>4</b> |
| 1.1      | Transformation of the marginal distribution of $Y_i^g \mid Y_i^g + Y_i'^g$ . . . . .                    | 4        |
| 1.2      | Mean and variance of $Y_i^g \mid Y_i^g + Y_i'^g$ . . . . .                                              | 4        |
| 1.3      | MCMC algorithm . . . . .                                                                                | 6        |
| 1.4      | Proof of the non-decreasing monotonicity of the estimated peFDR . . . . .                               | 10       |
| 1.5      | The simulation setting . . . . .                                                                        | 10       |
| 1.6      | Poisson-gamma mixture can result in our Poisson-beta simulation setting . .                             | 12       |
| 1.7      | Robustness studies for the PairedFB procedure when the likelihood function<br>is misspecified . . . . . | 13       |

---

\*qiujing@udel.edu

|          |                                                                                                                                                        |           |
|----------|--------------------------------------------------------------------------------------------------------------------------------------------------------|-----------|
| 1.8      | The computational problems of <code>ShrinkBayes</code> package . . . . .                                                                               | 14        |
| 1.9      | Negative binomial model can accommodate heterogeneous treatment effect<br>implicitly . . . . .                                                         | 15        |
| 1.10     | Difference between our real data analysis using <code>edgeR</code> and <code>baySeq</code> and the<br>original papers . . . . .                        | 15        |
| 1.11     | Comparing <code>PairedFB</code> with competing methods at comparable FDR levels for<br>real data analysis . . . . .                                    | 16        |
| <b>2</b> | <b>Figures</b>                                                                                                                                         | <b>18</b> |
| 2.1      | Empirical distribution of the method of moment estimators for $\pi^{*g}$ and $\phi^{*g}$ .                                                             | 18        |
| 2.2      | Simulation results for identifying statistical significant DE genes . . . . .                                                                          | 20        |
| 2.2.1    | Setting SE1: $\pi_{DE}^{*g}$ is drawn from empirical distribution scaled by $\sqrt{5}$<br>and $\phi^g$ is drawn from empirical distribution . . . . .  | 20        |
| 2.2.2    | Setting SE2: $\pi_{DE}^{*g}$ is drawn from empirical distribution scaled by $\sqrt{10}$<br>and $\phi^g$ is drawn from empirical distribution . . . . . | 21        |
| 2.2.3    | Setting E: $\pi_{DE}^{*g}$ is drawn from the original empirical distribution and<br>$\phi^g$ is drawn from empirical distribution . . . . .            | 25        |
| 2.2.4    | Setting P1: $\pi_{DE}^{*g} \sim N(0, 5 \times 0.68^2)$ , $\phi^g \sim \text{beta}(1, 12)$ . . . . .                                                    | 29        |
| 2.2.5    | Setting P2: $\pi_{DE}^{*g} \sim N(0, 5 \times 0.68^2)$ , $\phi^g \sim \text{beta}(1, 5)$ . . . . .                                                     | 33        |
| 2.3      | Simulation results for identifying biological significant DE genes . . . . .                                                                           | 37        |
| 2.3.1    | Setting SE1: $\pi_{DE}^{*g}$ is drawn from empirical distribution scaled by $\sqrt{5}$<br>and $\phi^g$ is drawn from empirical distribution . . . . .  | 37        |
| 2.3.2    | Setting SE2: $\pi_{DE}^{*g}$ is drawn from empirical distribution scaled by $\sqrt{10}$<br>and $\phi^g$ is drawn from empirical distribution . . . . . | 39        |
| 2.4      | Simulation results for robustness test . . . . .                                                                                                       | 42        |
| 2.4.1    | Setting SE1: $\pi_{DE}^{*g}$ is drawn from empirical distribution scaled by $\sqrt{5}$<br>and $\phi^g$ is drawn from empirical distribution. . . . .   | 42        |
| 2.4.2    | Setting SE2: $\pi_{DE}^{*g}$ is drawn from empirical distribution scaled by $\sqrt{10}$<br>and $\phi^g$ is drawn from empirical distribution. . . . .  | 46        |
| 2.5      | Results when running longer MCMC for Chung's methods . . . . .                                                                                         | 50        |

|                                  |           |
|----------------------------------|-----------|
| 2.6 Real Data Analysis . . . . . | 52        |
| <b>3 Tables</b>                  | <b>60</b> |

# 1 Supplementary Discussion

## 1.1 Transformation of the marginal distribution of $Y_i^g \mid Y_i^g + Y_i'^g$

To ensure the convergence when calculating the likelihood, we use the following transformation formulas for  ${}_2F_1(a, b; c; z)$  (Abramowitz and Stegun, 1964, pp. 559):

$${}_2F_1(a, b; c; z) = (1-z)^{c-a-b} {}_2F_1(c-a, c-b; c; z) \quad (1)$$

$$= (1-z)^{-b} {}_2F_1(b, c-a; c; \frac{z}{1-z}), \quad (2)$$

and rewrite the likelihood function by:

$$\begin{aligned} & p(Y_i^g \mid Y_i^g + Y_i'^g, \pi^g, \phi^g) \\ = & \frac{(Y_i^g + Y_i'^g)!}{Y_i^g! Y_i'^g!} \frac{B\left(Y_i^g + \pi^g \frac{1-\phi^g}{\phi^g}, Y_i'^g + (1-\pi^g) \frac{1-\phi^g}{\phi^g}\right)}{B\left(\pi^g \frac{1-\phi^g}{\phi^g}, (1-\pi^g) \frac{1-\phi^g}{\phi^g}\right)} \times \quad (3) \\ & \begin{cases} \left(\frac{L_i}{L_i'}\right)^{(1-\pi^g) \frac{1-\phi^g}{\phi^g}} {}_2F_1\left(\frac{1-\phi^g}{\phi^g}, Y_i'^g + (1-\pi^g) \frac{1-\phi^g}{\phi^g}; Y_i^g + Y_i'^g + \frac{1-\phi^g}{\phi^g}; 1 - \frac{L_i}{L_i'}\right) & \text{when } L_i < L_i' \\ \left(\frac{L_i'}{L_i}\right)^{\pi^g \frac{1-\phi^g}{\phi^g}} {}_2F_1\left(\frac{1-\phi^g}{\phi^g}, Y_i^g + \pi^g \frac{1-\phi^g}{\phi^g}; Y_i^g + Y_i'^g + \frac{1-\phi^g}{\phi^g}; 1 - \frac{L_i'}{L_i}\right) & \text{when } L_i \geq L_i'. \end{cases} \end{aligned}$$

The two expressions guarantees the convergence of hypergeometric function under  $L_i < L_i'$  and  $L_i \geq L_i'$ , respectively. Through simple algebra we can see that, if  $L_i = L_i'$ , the distribution would reduce to a beta-binomial( $Y_i^g + Y_i'^g; \pi^g, \phi^g$ ).

## 1.2 Mean and variance of $Y_i^g \mid Y_i^g + Y_i'^g$

The mean and variance of  $Y_i^g$  given the total count can be derived through relationship between  $p_i^g = \frac{\pi_i^g L_i}{\pi_i^g L_i + (1-\pi_i^g) L_i'}$  and  $\pi_i^g$ . Note that when  $\pi_i^g$  follows beta( $\alpha^g, \beta^g$ ), then  $p_i^g$  would follow a generalized three-parameter beta distribution introduced by and denoted by G3B( $\alpha^g, \beta^g, \lambda_i$ ), where  $\lambda_i = \frac{L_i'}{L_i}$ . The pdf of G3B( $\alpha, \beta, \lambda$ ) is given by

$$p(p \mid \alpha, \beta, \lambda) = \frac{\lambda^\alpha p^{\alpha-1} (1-p)^{\beta-1}}{B(\alpha, \beta) [1 - (1-\lambda)p]^{\alpha+\beta}}.$$

The derivation is given as below. If  $X \sim \text{G3B}(\alpha, \beta, \lambda)$ , the  $m$ th moment can be derived

from:

$$E(X^m) = \int_0^1 \frac{\lambda^\alpha x^{m+\alpha-1} (1-x)^{\beta-1}}{B(\alpha, \beta) [1 - (1-\lambda)x]^{\alpha+\beta}} dx \quad (4)$$

$$= \frac{\lambda^\alpha}{B(\alpha, \beta)} \int_0^1 \frac{x^{m+\alpha-1} (1-x)^{\beta-1}}{[1 - (1-\lambda)x]^{\alpha+\beta}} dx \quad (5)$$

$$= \frac{B(m+\alpha, \beta)}{B(\alpha, \beta)} \lambda^\alpha {}_2F_1(\alpha+\beta, m+\alpha; m+\alpha+\beta; 1-\lambda) \quad (6)$$

$$= \frac{\Gamma(\alpha+m)\Gamma(\alpha+\beta)}{\Gamma(\alpha)\Gamma(\alpha+\beta+m)} {}_2F_1(m, \beta; m+\alpha+\beta; 1-\lambda). \quad (7)$$

Note that for large  $\alpha, \beta$ , we have  $\frac{\Gamma(\beta+i)}{\Gamma(\beta)} \approx \beta^i$  and  $\frac{\Gamma(\alpha+\beta+m+i)}{\Gamma(\alpha+\beta+m)} \approx (\alpha+\beta)^i$ , thus:

$${}_2F_1(m, \beta; m+\alpha+\beta; 1-\lambda) = \sum_{i=0}^{\infty} \frac{\Gamma(\beta+i)\Gamma(\alpha+\beta+m)\Gamma(m+i)}{\Gamma(\beta)\Gamma(\alpha+\beta+m+i)\Gamma(m)} \cdot \frac{(1-\lambda)^i}{i!} \quad (8)$$

$$\approx \sum_{i=0}^{\infty} \frac{\Gamma(m+i)}{\Gamma(m)\Gamma(i+1)} \frac{\beta^i (1-\lambda)^i}{(\alpha+\beta)^i} \quad (9)$$

$$= \sum_{i=0}^{\infty} \binom{m-1+i}{i} \left[ \frac{(1-\lambda)\beta}{\alpha+\beta} \right]^i \quad (10)$$

$$= \left[ \frac{1}{1 - \frac{(1-\lambda)\beta}{\alpha+\beta}} \right]^m = \left[ \frac{\alpha+\beta}{\alpha+\lambda\beta} \right]^m. \quad (11)$$

As a result,

$$E(X^m) \approx \frac{\Gamma(\alpha+m)\Gamma(\alpha+\beta)}{\Gamma(\alpha)\Gamma(\alpha+\beta+m)} \left[ \frac{\alpha+\beta}{\alpha+\lambda\beta} \right]^m.$$

So that the first and second moment can be directly approximated as:

$$E(X) \approx \frac{\alpha}{\alpha+\lambda\beta} \quad (12)$$

$$E(X^2) \approx \frac{\alpha(\alpha+1)(\alpha+\beta)}{(\alpha+\beta+1)(\alpha+\lambda\beta)^2}, \quad (13)$$

which gives

$$Var(X) \approx \frac{\alpha\beta}{(\alpha+\beta+1)(\alpha+\lambda\beta)^2}.$$

Coming back to the likelihood model for our method, it becomes

$$E(Y_{ij}^g | Y_{ij}^g + Y_{ij}'^g, \pi_i^g, \phi_i^g) = E[E(Y_{ij}^g | p_{ij}^g)] = (Y_{ij}^g + Y_{ij}'^g) E(p_{ij}^g) \quad (14)$$

$$\approx (Y_{ij}^g + Y_{ij}'^g) \frac{\alpha_i^g}{\alpha_i^g + \lambda_{ij} \beta_i^g} \quad (15)$$

$$= \frac{(Y_{ij}^g + Y_{ij}'^g) \pi_i^g}{\pi_i^g + (1 - \pi_i^g) \lambda_{ij}}; \quad (16)$$

and

$$\text{Var}(Y_{ij}^g | Y_{ij}^g + Y_{ij}'^g, \pi_i^g, \phi_i^g) = E[\text{Var}(Y_{ij}^g | p_{ij}^g)] + \text{Var}[E(Y_{ij}^g | p_{ij}^g)] \quad (17)$$

$$= E[(Y_{ij}^g + Y_{ij}'^g)p_{ij}^g(1 - p_{ij}^g)] + \text{Var}[(Y_{ij}^g + Y_{ij}'^g)p_{ij}^g] \quad (18)$$

$$\approx \frac{(Y_{ij}^g + Y_{ij}'^g)\alpha_i^g\beta_i^g[\lambda_{ij}(\alpha_i^g + \beta_i^g + 1) - 1] + (Y_{ij}^g + Y_{ij}'^g)^2\alpha_i^g\beta_i^g}{(\alpha_i^g + \lambda_{ij}\beta_i^g)^2(\alpha_i^g + \beta_i^g + 1)} \quad (19)$$

$$= (Y_{ij}^g + Y_{ij}'^g) \frac{\alpha_i^g\beta_i^g}{(\alpha_i^g + \lambda_{ij}\beta_i^g)^2} \left[ \frac{Y_{ij}^g + Y_{ij}'^g - 1}{(\alpha_i^g + \beta_i^g + 1)} + 1 \right] \quad (20)$$

$$= \frac{(Y_{ij}^g + Y_{ij}'^g)\pi_i^g(1 - \pi_i^g)L_{ij}^2}{[\pi_i^g L_{ij} + (1 - \pi_i^g)L_{ij}']^2} [(Y_{ij}^g + Y_{ij}'^g - 1)\phi_i^g + 1]; \quad (21)$$

Then using the result of moments of G3B distribution above, for large  $\alpha^g$  and  $\beta^g$ , we get approximation of the mean and variance of data as:

$$E(Y_i^g | Y_i^g + Y_i'^g, \pi^g, \phi^g) \approx (Y_i^g + Y_i'^g) \frac{\pi^g L_i}{\pi^g L_i + (1 - \pi^g)L_i'}; \quad (22)$$

$$\text{Var}(Y_i^g | Y_i^g + Y_i'^g, \pi^g, \phi^g) \approx (Y_i^g + Y_i'^g)[(Y_i^g + Y_i'^g - 1)\phi^g + 1] \frac{\pi^g(1 - \pi^g)L_i^2}{[\pi^g L_i + (1 - \pi^g)L_i']^2} \quad (23)$$

### 1.3 MCMC algorithm

We would build a hybrid Gibbs sampler to get the posterior samples  $(\pi^{*g}, \phi^{*g}, \gamma^g)$  for each gene and  $(p, \mu_0, \mu, \sigma_0^2, \sigma^2)$ , where we use Gibbs sampler for components with full conditional distributions available for direct sampling and Metropolis-Hasting algorithm for parameters with complicated full conditional distributions.

Since the model selection parameter  $\pi^{*g}$  has prior involving mixture of point mass and is difficult to be integrated out in presence of complex likelihood, to avoid reducibility of Markov chain, we re-parameterize it into the likelihood with the model indicator  $\gamma^g$  by:

$$\pi^{*g} = I(\gamma^g = 1)\tilde{\pi}^{*g},$$

where  $\tilde{\pi}^{*g}$  is a free parameter following Gaussian prior  $N(\mu_0, \sigma_0^2)$ . The likelihood can therefore be rewritten as:

$$p(\mathbf{Y}^g | \pi^{*g}, \phi^g) = p(\mathbf{Y}^g | \tilde{\pi}^{*g}, \gamma^g, \phi^g), \quad (24)$$

with prior of  $(\tilde{\pi}^{*g}, \gamma^g)$ :

$$p(\tilde{\pi}^{*g}, \gamma^g) = N(\tilde{\pi}^{*g} | \mu_0, \sigma_0^2) p^{\gamma^g} (1 - p)^{1 - \gamma^g}. \quad (25)$$

We prove the equivalence between the original parameterization and the re-parameterization as below.

*Proof.* To validate the above re-parameterization, we essentially have to make sure  $p(\gamma^g|\mathbf{Y})$  is the same. Since:

$$p(\gamma^g|\mathbf{Y}) = \int p(\gamma^g|\mathbf{p}, \mathbf{Y})p(\mathbf{p}|\mathbf{Y})d\mathbf{p} \propto \int p(\mathbf{Y}^g|\gamma^g)p(\gamma^g|\mathbf{p})p(\mathbf{p}|\mathbf{Y})d\mathbf{p}, \quad (26)$$

while other terms remain the same, we only have to prove both parameterization give the same  $p(\mathbf{Y}^g|\gamma^g)$ .

Note that, for the original parameterization:

$$p(\mathbf{Y}^g|\gamma^g) = \iint p(\mathbf{Y}^g|\pi^{*g}, \phi^{*g})p(\pi^{*g}|\gamma^g)d\pi^{*g}p(\phi^{*g})d\phi^{*g},$$

where

$$\int p(\mathbf{Y}^g|\pi^{*g}, \phi^{*g})p(\pi^{*g}|\gamma^g)d\pi^{*g} = \begin{cases} \int p(\mathbf{Y}^g|\pi^{*g}, \phi^{*g})N(\pi^{*g}|\mu_0, \sigma_0^2)d\pi^{*g} & \gamma^g = 1 \\ p(\mathbf{Y}^g|0, \phi^{*g}) & \gamma^g = 0 \end{cases}$$

On the other hand, for the re-parameterized form:

$$p(\mathbf{Y}^g|\gamma^g) = \iint p(\mathbf{Y}^g|\tilde{\pi}^{*g}, \gamma^g, \phi^{*g})p(\tilde{\pi}^{*g})d\tilde{\pi}^{*g}p(\phi^{*g})d\phi^{*g},$$

where

$$\int p(\mathbf{Y}^g|\tilde{\pi}^{*g}, \gamma^g, \phi^{*g})p(\tilde{\pi}^{*g})d\tilde{\pi}^{*g} = \begin{cases} \int p(\mathbf{Y}^g|\tilde{\pi}^{*g}, \phi^{*g})N(\tilde{\pi}^{*g}|\mu_0, \sigma_0^2)d\tilde{\pi}^{*g} & \gamma^g = 1 \\ p(\mathbf{Y}^g|0, \phi^{*g}) \int N(\tilde{\pi}^{*g}|\mu_0, \sigma_0^2)d\tilde{\pi}^{*g} & \gamma^g = 0 \end{cases}$$

So the equivalence of the two parameterizations is established.  $\square$

After such re-parameterization, the model parameters now become  $\tilde{\Theta}^{*g} = (\tilde{\pi}^{*g}, \gamma^g, \phi^{*g})$ , where our main interest is the posterior samples of  $\gamma^g$  and  $\tilde{\pi}^{*g}$  is an auxiliary parameter that has nothing to do with posterior inference but makes the sampling procedure feasible without complicated calculation of integral.

With the new parameterization  $\tilde{\pi}^{*g}\gamma^g = \pi^{*g} = \log\left(\frac{\pi^g}{1-\pi^g}\right)$ , and  $\phi^{*g} = \log\left(\frac{\phi^g}{1-\phi^g}\right)$ , based on the original likelihood shown in the main text Equation (5), we can now rewrite the

likelihood function for each gene as:

$$p(\mathbf{Y}^g | \tilde{\pi}^{*g}, \gamma^g, \phi^{*g}) \propto \frac{B[Y_i^g + (1 + e^{-\tilde{\pi}^{*g}\gamma^g})^{-1}e^{\phi^{*g}}, Y_i'^g + (1 + e^{-\tilde{\pi}^{*g}\gamma^g})^{-1}e^{\phi^{*g} - \tilde{\pi}^{*g}\gamma^g}]}{B[(1 + e^{-\tilde{\pi}^{*g}\gamma^g})^{-1}e^{\phi^{*g}}, (1 + e^{-\tilde{\pi}^{*g}\gamma^g})^{-1}e^{\phi^{*g} - \tilde{\pi}^{*g}\gamma^g}]} \quad (27)$$

$$\times {}_2F_1\left(Y_i^g + Y_i'^g, Y_i^g + (1 + e^{-\tilde{\pi}^{*g}\gamma^g})^{-1}e^{\phi^{*g}}; Y_i^g + Y_i'^g + e^{\phi^{*g}}; 1 - \frac{L_i'}{L_i}\right),$$

Then the joint posterior of  $(\tilde{\Theta}^*, \boldsymbol{\eta})$  is given by:

$$p(\tilde{\Theta}^*, p, \boldsymbol{\eta} | \mathbf{Y}) \propto \left\{ \prod_{g=1}^G p(\mathbf{Y}^g | \tilde{\Theta}^*, p) \cdot p(\tilde{\Theta}^{*g} | \boldsymbol{\eta}) \right\} \pi(p) \pi(\boldsymbol{\eta}) \quad (28)$$

$$\propto \prod_{g=1}^G [p(\mathbf{Y}^g | \tilde{\pi}^{*g}, \gamma^g, \phi^{*g}) N(\tilde{\pi}^{*g} | \mu_0, \sigma_0^2) N(\phi^{*g} | \mu, \sigma^2) p^{\gamma^g} (1-p)^{1-\gamma^g}]$$

$$\times p^{\delta_1-1} (1-p)^{\delta_2-1} \times e^{-\frac{\mu^2}{2}} \times (\sigma_0^2)^{-a_0-1} e^{-\frac{b_0}{\sigma_0^2}} \times (\sigma^2)^{-a-1} e^{-\frac{b}{\sigma^2}}, \quad (29)$$

with  $\delta_1 = \delta_2 = 1$ ,  $a_0 = b_0 = a = b = 0.5$ .

Thus, for each gene  $g$ ,  $g = 1 \dots G$ , the full conditionals of model parameters  $\tilde{\Theta}^{*g} = (\tilde{\pi}^{*g}, \gamma^g, \phi^{*g})$  are given by:

$$P(\gamma^g = 1 | \dots) = \frac{p(\mathbf{Y}^g | \tilde{\pi}^{*g}, \gamma^g = 1, \phi^{*g}) p}{p(\mathbf{Y}^g | \tilde{\pi}^{*g}, \gamma^g = 1, \phi^{*g}) p + p(\mathbf{Y}^g | \tilde{\pi}^{*g}, \gamma^g = 0, \phi^{*g}) (1-p)} \quad (30)$$

$$p(\tilde{\pi}^{*g} | \dots) \propto I(\gamma^g = 1) p(\mathbf{Y}^g | \tilde{\pi}^{*g}, \phi^{*g}) N(\tilde{\pi}^{*g} | \mu_0, \sigma_0^2) \quad (31)$$

$$+ I(\gamma^g = 0) N(\tilde{\pi}^{*g} | \mu_0, \sigma_0^2)$$

$$p(\phi^{*g} | \dots) \propto p(\mathbf{Y}^g | \gamma^g, \tilde{\pi}^{*g}, \phi^{*g}) N(\phi^{*g} | \mu, \sigma^2). \quad (32)$$

The parameter of DE proportion is updated by:

$$p(p | \dots) \sim \text{Beta}\left(\delta_1 + \sum_{g=1}^G I(\gamma^{g(m)} = 1), \delta_2 + \sum_{g=1}^G I(\gamma^{g(m)} = 0)\right). \quad (33)$$

And the full conditional for the hyper-parameters are:

$$p(\mu_0 | \dots) \sim N\left(\bar{\tilde{\pi}}^*, \frac{\sigma_0^2}{G}\right) \quad (34)$$

$$p(\mu | \dots) \sim N\left(\bar{\phi}^*, \frac{\sigma^2}{G}\right) \quad (35)$$

$$p(\sigma_0^2 | \dots) \sim IG\left(\frac{G}{2} + a_0, \frac{\sum_{g=1}^G (\tilde{\pi}^{*g} - \mu_0)^2}{2} + b_0\right) \quad (36)$$

$$p(\sigma^2 | \dots) \sim IG\left(\frac{G}{2} + a, \frac{\sum_{g=1}^G (\phi^{*g} - \mu)^2}{2} + b\right), \quad (37)$$

where  $\bar{\tilde{\pi}}^* = \frac{1}{G} \sum_{g=1}^G \tilde{\pi}^{*g}$ ,  $\bar{\phi}^* = \frac{1}{G} \sum_{g=1}^G \phi^{*g}$ .



So we conclude the MCMC procedure by following steps after giving initial values. For the  $m$ -th iteration:

Step 1. For the  $g$ -th gene,  $g = 1 \dots G$ :

(a) Sample  $\gamma^{g(m)}$  directly from Bernoulli( $pp^g$ ), where

$$pp^g = \frac{p(\mathbf{Y}^g | \tilde{\pi}^{*g(m-1)}, \phi^{*g(m-1)})p^{(m-1)}}{p(\mathbf{Y}^g | \tilde{\pi}^{*g(m-1)}, \phi^{*g(m-1)})p^{(m-1)} + p(\mathbf{Y}^g | 0, \phi^{*g(m-1)})(1 - p^{(m-1)})};$$

(b) Sample  $\tilde{\pi}^{*g(m)}$  from the full conditional distribution in (31) by Metropolis-Hasting algorithm:

- sample the proposal  $\tilde{\pi}^{*g(prop)}$  from  $N(\mu_0^{(m-1)}, \sigma_0^{2(m-1)})$ ,
- calculate ratio  $r_1 = \frac{p(\mathbf{Y}^g | \tilde{\pi}^{*g(prop)}, \phi^{*g(m-1)}, \gamma^{g(m)})}{p(\mathbf{Y}^g | \tilde{\pi}^{*g(m-1)}, \phi^{*g(m-1)}, \gamma^{g(m)})}$
- update  $\tilde{\pi}^{*g(m)} = \begin{cases} \tilde{\pi}^{*g(prop)} & \text{if } r_1 > r^* \\ \tilde{\pi}^{*g(m-1)} & \text{if } r_1 \leq r^* \end{cases}$ , where  $r^*$  is sampled from Unif(0,1).

(c) Sample  $\phi^{*g(m)}$  from the full conditional distribution in equation (32) by Metropolis-Hasting algorithm:

- sample the proposal  $\phi^{*g(prop)}$  from  $N(\mu^{(m-1)}, \sigma^{2(m-1)})$ ,
- calculate ratio  $r_2 = \frac{p(\mathbf{Y}^g | \tilde{\pi}^{*g(m)}, \phi^{*g(prop)}, \gamma^{g(m)})}{p(\mathbf{Y}^g | \tilde{\pi}^{*g(m)}, \phi^{*g(m-1)}, \gamma^{g(m)})}$
- update  $\phi^{*g(m)} = \begin{cases} \phi^{*g(prop)} & \text{if } r_2 > r^* \\ \phi^{*g(m-1)} & \text{if } r_2 \leq r^* \end{cases}$ , where  $r^*$  is sampled from Unif(0,1).

Step 2. Sample  $p^{(m)}$  from Beta  $\left(\delta_1 + \sum_{g=1}^G I(\gamma^{g(m)} = 1), \delta_2 + \sum_{g=1}^G I(\gamma^{g(m)} = 0)\right)$ .

Step 3. Sample  $\mu_0^{(m)}$  from  $N\left(\bar{\tilde{\pi}}^{*(m)}, \frac{\sigma_0^{2(m-1)}}{G}\right)$ .

Step 4. Sample  $\mu^{(m)}$  from  $N\left(\bar{\phi}^{*(m)}, \frac{\sigma^{2(m-1)}}{G}\right)$ .

Step 5. Sample  $\sigma_0^{2(m)}$  from  $IG\left(\frac{G}{2} + a_0, \frac{\sum_{g=1}^G (\tilde{\pi}^{*g(m)} - \mu_0^{(m)})^2}{2} + b_0\right)$ .

Step 6. Sample  $\sigma^{2(m)}$  from  $IG\left(\frac{G}{2} + a, \frac{\sum_{g=1}^G (\phi^{*g(m)} - \mu^{(m)})^2}{2} + b\right)$ .

## 1.4 Proof of the non-decreasing monotonicity of the estimated peFDR

First, denote the ranked (from largest to smallest)  $l$ -th estimated posterior probability of  $\gamma^g = 1$  as  $\hat{p}^{(l)}$ , that is  $\hat{p}^{(l)} \geq \hat{p}^{(l+1)}$ . We want to prove

$$\text{peFDR}^{(l)} \leq \text{peFDR}^{(l+1)}, \quad (38)$$

where  $\text{peFDR}^{(l)} = \frac{\sum_{i=1}^l (1 - \hat{p}^{(i)})}{l}$ .

*Proof.* Since  $\text{peFDR}^{(l+1)} = \frac{\sum_{i=1}^l (1 - \hat{p}^{(i)}) + (1 - \hat{p}^{(l+1)})}{l+1}$ , in order to prove

$$\frac{\sum_{i=1}^l (1 - \hat{p}^{(i)})}{l} \leq \frac{\sum_{i=1}^l (1 - \hat{p}^{(i)}) + (1 - \hat{p}^{(l+1)})}{l+1}, \quad (39)$$

we need to show

$$\sum_{i=1}^l (1 - \hat{p}^{(i)}) \leq l(1 - \hat{p}^{(l+1)}), \quad (40)$$

i.e.  $\sum_{i=1}^l \hat{p}^{(i)} \geq l \times \hat{p}^{(l+1)}$ .

This is true because  $\hat{p}^{(1)} \geq \dots \geq \hat{p}^{(l)} \geq \hat{p}^{(l+1)}$  indicates  $\sum_{i=1}^l \hat{p}^{(i)} \geq l \times \hat{p}^{(l+1)}$ .  $\square$

## 1.5 The simulation setting

For the  $g$ th gene, the paired read counts of the  $i$ th pair  $Y_i^g$  and  $Y_i'^g$  are sampled from two independent Poisson distributions as follows:

$$Y_i^g \sim \text{Poi}(\lambda_i^g L_i \pi_i^g) \quad (41)$$

$$Y_i'^g \sim \text{Poi}(\lambda_i^g L_i' (1 - \pi_i^g)). \quad (42)$$

By setting the normalization factor at 1 for all libraries, we simulate the library sizes  $L_i$  and  $L_i'$  from discrete uniform distribution from 8 to 23 million (These numbers were obtained from the range of the estimated library sizes of the human tumor dataset. ) When analyzing the simulated data, we use the true simulated library sizes for all the competitive methods in order to eliminate the effect of normalization. The parameters  $\mu_i^g$  and  $\mu_i'^g$  are generated by the equations  $\mu_i^g = \lambda_i^g \pi_i^g$  and  $\mu_i'^g = \lambda_i^g (1 - \pi_i^g)$ , respectively. Note that  $\mu_i^g + \mu_i'^g = \lambda_i^g$  and  $\pi_i^g = \frac{\mu_i^g}{\mu_i^g + \mu_i'^g}$ . Here  $\lambda_i^g$  is the total expression levels of gene  $g$  in pair  $i$  after adjusting for

the library size, which is sampled from the empirical distribution of the methods of moment estimators based on human tumor dataset. Specifically, it is easy to obtain  $\lambda_i^g = \frac{EY_i^g}{L_i} + \frac{EY_i'^g}{L_i'}$ . Thus the moment estimator of  $\lambda_i^g$  would be

$$\hat{\lambda}_i^g = \frac{y_i^g}{\hat{L}_i} + \frac{y_i'^g}{\hat{L}_i'}, \quad (43)$$

where  $y_i^g$  and  $y_i'^g$  are the observed read counts of treatment and control group for gene  $g$  and pair  $i$ ,  $\hat{L}_i$  and  $\hat{L}_i'$  are the estimated library sizes using the weighted trimmed mean of M-values (TMM) method by Robinson and Oshlack (2010).

The parameter  $\pi_i^g$  is the proportion of the treatment mean out of the overall pair mean for the  $i$ -th pair and is generated by  $\pi_i^g \sim \text{beta} \left( \pi^g \left[ \frac{1-\phi^g}{\phi^g} \right], (1 - \pi^g) \left[ \frac{1-\phi^g}{\phi^g} \right] \right)$ , allowing treatment effects to vary among different pairs. The average treatment effect  $\pi^g$  is set to be  $\frac{1}{2}$  for non-DE genes so that  $\pi^{*g} = 0$ , and  $\pi^{*g}$  of DE genes (i.e.  $\pi_{DE}^{*g}$ ) is simulated from various settings including parametric and empirical distributions. The parameter  $\phi^g$  controls the heterogeneity level of treatment effects and is also simulated from parametric or empirical settings. Note that this Poisson-beta simulation setting can also arise from the negative binomial or Poisson-gamma mixture setting, see the Supplementary Discussion Section 1.6 for detailed discussion.

We generate  $\pi_{DE}^{*g}$  and  $\phi^g$  from five different distribution combinations.

**Setting E:** Both  $\pi_{DE}^{*g}$  and  $\phi^g$  are drawn from the empirical distribution (see Supplementary Figures S1, S2 for density curves of the empirical estimates of  $\pi^{*g}$  and  $\phi^{*g}$ ).

**Settings SE1 and SE2:**  $\phi^g$  is drawn from empirical distribution but  $\pi_{DE}^{*g}$  is drawn from a scaled empirical distribution with a scalar of  $\sqrt{5}$  and  $\sqrt{10}$ , respectively.

**Settings P1 and P2:**  $\pi_{DE}^{*g} \sim N(0, 5 \times 0.68^2)$ ,  $\phi^g \sim \text{beta}(1, b)$  where  $b = 12$  and  $5$ , respectively.

The first three setting are the empirical settings where **E** represents empirical and **SE** represent scaled empirical. The last two settings are the parametric settings, which are represented by **P**. For settings SE1 and SE2, we scale the empirical distribution for  $\pi_{DE}^{*g}$  without changing the mean. In other words, we generate  $\pi_{DE}^{*g}$  from empirical values of  $\hat{\pi}_{new}^{*g} = \sqrt{a}(\hat{\pi}_o^{*g} - \hat{\mu}_o) + \hat{\mu}_o$ ,

where  $\hat{\pi}_o^{*g}$  is the original estimates from real data,  $\hat{\mu}_o$  is the mean of  $\hat{\pi}_o^{*g}$ s' and  $\sqrt{a}$  is a scalar to amplify the percentage of large signals. The larger  $a$  is, the larger percentage of large signal it produces. See supplementary Figure S1 for the density curves of  $\hat{\pi}_{new}^{*g}$  under various values of  $a$  and note  $\hat{\pi}_{new}^{*g} = \hat{\pi}_o^{*g}$  when  $a = 1$ . For the parametric settings P1 and P2, the normal variance  $\sigma^2 = 0.68$  is estimated from the human tumor dataset by Tuch *et al.* (2010) and we amplify the signal by scaling by  $\sqrt{5}$ . The overdispersion parameter  $\phi^g$  is sampled from beta(1,  $b$ ) where beta(1, 12) tries to match with the empirical distribution of  $\phi^g$  and beta(1, 5) represents the case when there is higher level of heterogeneity in the treatment effects (see Supplementary Figure S2). For each of the five settings, we consider six different combinations of sample size and proportion of DE genes. In particular, we consider three sample sizes ( $n = 3, 5, 10$ ) and two proportions of DE genes ( $p = 10\%, 20\%$ ).

To estimate empirical values of  $\pi^g$  from human tumor dataset, i.e. the mean treatment effect of gene  $g$  across all the libraries, we use the fact that  $\pi^g = E(\pi_i^g) = E\left(\frac{\mu_i^g}{\mu_i^g + \mu_i'^g}\right)$ . Since  $\hat{\pi}_i^g = \frac{\hat{\mu}_i^g}{\hat{\mu}_i^g + \hat{\mu}_i'^g} = \frac{y_i^g / \hat{L}_i}{y_i^g / \hat{L}_i + y_i'^g / \hat{L}_i'}$ , the moment estimator of  $\pi^g$  is given by:

$$\hat{\pi}^g = \bar{\hat{\pi}}_i^g = \frac{1}{n} \sum_{i=1}^n \hat{\pi}_i^g \quad (44)$$

The overdispersion parameter  $\phi^g$  is defined based on the reparameterization of Beta distribution as  $\phi^g = \frac{Var(\pi_i^g)}{E(\pi_i^g)[1-E(\pi_i^g)]}$ . and therefore its moment estimator would be:

$$\hat{\phi}^g = \frac{\widehat{Var}(\hat{\pi}_i^g)}{\bar{\hat{\pi}}_i^g(1 - \bar{\hat{\pi}}_i^g)}. \quad (45)$$

We also check the robustness of the proposed full Bayesian model by generating data using a different likelihood from our model assumption. Please see Supplementary Discussion Section 1.7 for details.

## 1.6 Poisson-gamma mixture can result in our Poisson-beta simulation setting

To see this, let

$$\begin{aligned} Y_i^g | \mu_i^g &\sim \text{Poi}(\mu_i^g L_i) \\ Y_i'^g | \mu_i'^g &\sim \text{Poi}(\mu_i'^g L_i'). \end{aligned}$$

If  $\mu_i^g = \lambda_i^g \theta_i^g$  and  $\mu_i'^g = \lambda_i^g \theta_i'^g$  with  $\theta_i^g \sim Ga(a^g, b^g)$  and  $\theta_i'^g \sim Ga(a'^g, b^g)$ , then  $\pi_i^g = \frac{\mu_i^g}{\mu_i^g + \mu_i'^g} = \frac{\theta_i^g}{\theta_i^g + \theta_i'^g} \sim \text{beta}(a^g, a'^g)$ .

## 1.7 Robustness studies for the PairedFB procedure when the likelihood function is misspecified

In the main text, we have considered the simulation studies under the beta binomial framework with different prior distributions for the parameters  $\phi^g$  and  $\pi_{DE}^{*g}$ . To check the robustness of the proposed full Bayesian model, we follow the strategy of Hardcastle and Kelly (2013) to replace the beta distribution of  $\pi_i^g$  by the minimax distribution. Specifically, instead of generating  $\pi_i^g$  from  $\text{beta}\left(\pi^g \left[\frac{1-\phi^g}{\phi^g}\right], (1-\pi^g) \left[\frac{1-\phi^g}{\phi^g}\right]\right)$ , we sample  $\pi_i^g$  from the minimax distribution (Jones, 2004) with density as below:

$$f(x|a, b) = abx^{a-1}(1-x)^{b-1}, \quad 0 < x < 1 \quad (46)$$

for  $a > 0$ ,  $b > 0$ . The minimax distribution has the mean of  $bB(1+1/a, b)$  and the variance of  $bB(1+2/a, b) - [bB(1+1/a, b)]^2$ . We match the mean and variance used in the beta distribution for the minimax distribution by numerically solving  $a$  and  $b$  according to the value of  $\pi^g$  and  $\phi^g$  sampled from either empirical or parametric setting.

For robustness test, we considered the two scaled empirical settings SE1 and SE2 for  $\pi^g$  and  $\phi^g$ . The results are shown in Figures S25 to S32. Based on the FD plots and ROC plots of these figures, the PairedFB is the best procedure in terms of ranking the true DE genes on the top and Chung's method being the least favorable. The advantage of PairedFB over other procedures becomes more pronounced for larger sample sizes and larger proportion of DE genes. As expected, the PairedFB fails to control FDR at nominal levels due to model misspecification in many cases. However, the actual FDR of our method remains the lowest among all the methods for almost all cases. Note for small sample size ( $n = 3$ ) and low DE proportion (top left panels of Figure S27-S28, S31-S32), all the methods fail to deliver reasonable results in terms of FDR and power. As the sample size or DE proportion increases, the actual FDR of our method converges to the nominal level (see bottom panels of Figure S27-S28, S31-S32). Under such simulation settings, the limma voom method cannot control FDR at small sample sizes anymore and still has the undesirable property of increased FDR

level with the sample size. The result shows that our procedure is very robust in terms of its relative performance with existing methods. We would suggest to be cautious on the analysis result for all the methods when sample size is small, as no statistical magic would happen with only few information.

## 1.8 The computational problems of ShrinkBayes package

We also try to compare with the **ShrinkBayes** package proposed by Van De Wiel *et al.* (2013) by building generalized linear mixed model (GLMM) with random pair effect and assuming data follow Poisson distribution. However, we have encountered numerous computational problems with this software. First all, we failed to install this software (version 2.13.4) in at least three computers including a university linux server, one Macbook air and one Mac pro. We were finally able to install it successfully in one Windows PC (with 4 CPUs) and conducted the simulation study using **ShrinkBayes**. However, we kept getting error messages such as failure in convergence of the Newton-Ralphson optimizer. This was explained by the installation guide of the software, "when running ShrinkBayes you may see **\*\*\* WARNINGS \*\*\*** from INLA (e.g. on eigenvalues, or on convergence, or even something like 18500 Aborted...). They can currently not be suppressed, because they are produced by C-code. Please ignore them." Based on 50 runs of simulation, we decided to exclude this method in our comparison since the results consistently showed overly large false positive rate (e.g. the method would declare 80% DE genes at 5% nominal level when the true DE proportion is only 10%). We are not sure such a high false positive rates is due to the method itself or due to the internal error of the INLA package used by the software. After contacting the author of ShrinkBayes, we also tried to fit the GLMM with Negative Binomial distribution for the data, but the program was not responsive after 4 iterations in the ShrinkSeq step mainly because of the memory limit of the computer. Due to all the problems we encountered with using ShrinkSeq, we decided not to include the results of ShrinkBayes (Van De Wiel *et al.*, 2013) in our comparison for the simulation study and real data analysis.

## 1.9 Negative binomial model can accommodate heterogeneous treatment effect implicitly

The negative binomial model can actually accommodate the heterogeneous treatment effects implicitly to some extent. One can see this by viewing the negative binomial distributions arising from the Poisson-gamma mixture distribution. Let

$$\begin{aligned} Y_i^g | \mu_i^g &\sim \text{Poi}(\mu_i^g L_i) \\ Y_i'^g | \mu_i'^g &\sim \text{Poi}(\mu_i'^g L_i'). \end{aligned}$$

Here  $\mu_i^g = \lambda^g Q_i^g \theta_i^g$  and  $\mu_i'^g = \lambda'^g Q_i'^g \theta_i'^g$ , with  $\lambda^g$  and  $\lambda'^g$  the baseline expression level of gene  $g$  in the first and second treatment after adjusting for the library size, respectively, and  $Q_i^g$  the pair effect. If  $\theta_i^g \sim \text{Ga}(a^g, b^g)$  and  $\theta_i'^g \sim \text{Ga}(a'^g, b'^g)$ , then the treatment effect  $\pi_i^g = \frac{\mu_i^g}{\mu_i^g + \mu_i'^g} = \frac{\lambda^g \theta_i^g}{\lambda^g \theta_i^g + \lambda'^g \theta_i'^g}$  is different for each pair  $i$ .

## 1.10 Difference between our real data analysis using edgeR and baySeq and the original papers

The number of DEGs detected by the paired baySeq according to our data analysis (1528) is quite different from what was reported in Hardcastle and Kelly (2013). The difference is due to different ways of formulating the problem. Here in our data analysis, we aim to test whether the fold-change between tumor and normal tissue is one by treating patients as replicates under the same model structure, while Hardcastle and Kelly (2013) tested the consistent fold change across patients by treating the patients as one factor of the experiment. The number of DEGs detected by the edgeR based on our data analysis (1269) is close to what was obtained for the same data analysis in edgeR user's guide of V3.12.1 (1272) and the minor inconsistency is due to different data preprocessing results (note in edgeR user's guide, they keep observations with the largest number of total read counts if there's any duplicated gene symbol).

## 1.11 Comparing PairedFB with competing methods at comparable FDR levels for real data analysis

Now, we compare the results of PairedFB with edgeR or baySeq at comparable FDR level. Since our simulation studies show that the actual FDRs of the paired baySeq and edgeR are highly inflated for sample size of 3, it is not fair to compare them with our method at the same nominal level. Instead, we want to compare our method at 5% nominal level with edgeR or paired baySeq at a comparable FDR level. Comparable FDR level means that the resulting actual FDR levels are comparable. Although for real data, we do not know the truth and cannot evaluate the actual FDR, we can use the simulation results to guide our choice of nominal FDR levels. Recall our simulation studies show the FD plots and the ROC curves of the three methods are similar for sample size 3, which implies that their actual FDR would be comparable when their powers are comparable. In other words, when the three methods detect similar amount of DEGs, their actual FDRs should be comparable. Therefore, we fix the nominal level of the PairedFB at 5% and pick nominal level of 3% for the paired baySeq and 4% for edgeR such that they detect similar amount of DEGs (as highlighted in bold in main Table 1). Such a choice is non-favorable to our method based on the simulation studies since it has been shown that the smallest actual FDR of the other two methods at nominal level 3% or 4% would be inflated to at least 7% when the sample size is 3, while the actual FDR of PairedFB is always close to or slightly less than 5% at nominal level 5%. One purpose of doing such a comparison is to remind readers that one can trust the nominal FDR level of PairedFB, while they need to be cautious about interpreting the nominal FDR level of the edgeR or paired baySeq method.

When the nominal levels of the PairedFB, the edgeR and the paired baySeq are set to be 5%, 4% and 3% respectively, they detect similar amounts of DEGs (around 1200) with a large percentage of overlapping genes (1043 overlapping DEGs are detected by all three methods, see the Venn diagram in Figure S40). Although they detect a lot of common genes at comparable FDR levels, there are still genes uniquely identified by each method. The top 20 enriched gene sets based on the overlapping genes detected by both PairedFB and edgeR (or baySeq) methods are mostly cancer or carcinoma related (bolded in Supplementary



Table S5), where the “RICKMAN HEAD AND NECK CANCER F” gene set is ranked among top 10. Therefore, the list of overlapping genes detected by both PairedFB and edgeR (or baySeq) is a reliable list with important biological significance, to which we could compare the top 20 enriched gene sets based on the DEG list of uniquely identified genes by either method. Supplementary Figure S41 draws the Venn diagram of the top 20 enriched gene sets based on DEGs detected by both PairedFB and edgeR (or baySeq), by PairedFB only, and by edgeR (or baySeq), respectively. The Venn diagrams in Supplementary Figure S41 show that the “PairedFB only” has 35% and 15% enriched gene sets in its top 20 list that are overlapped with those based on the commonly detected genes with edgeR and baySeq, most of which are top ranked enriched gene sets; while “edgeR only” and “baySeq only” have 10% and 5% overlapping with those based on the commonly detected genes, respectively. Furthermore, one important gene set “RICKMAN HEAD AND NECK CANCER C”, which is directly related to the biological target of the dataset, is only enriched in list of genes uniquely identified by PairedFB at top 10th (see third column in Supplementary Table S5) when comparing with baySeq. This indicates the DEGs identified by PairedFB only at nominal level 5% are biologically more consistent with the DEGs identified by both PairedFB and edgeR (or baySeq) and tends to uniquely identify more biological related genes when compare with other competing methods at lower nominal levels.

## 2 Figures

### 2.1 Empirical distribution of the method of moment estimators for $\pi^{*g}$ and $\phi^{*g}$ .

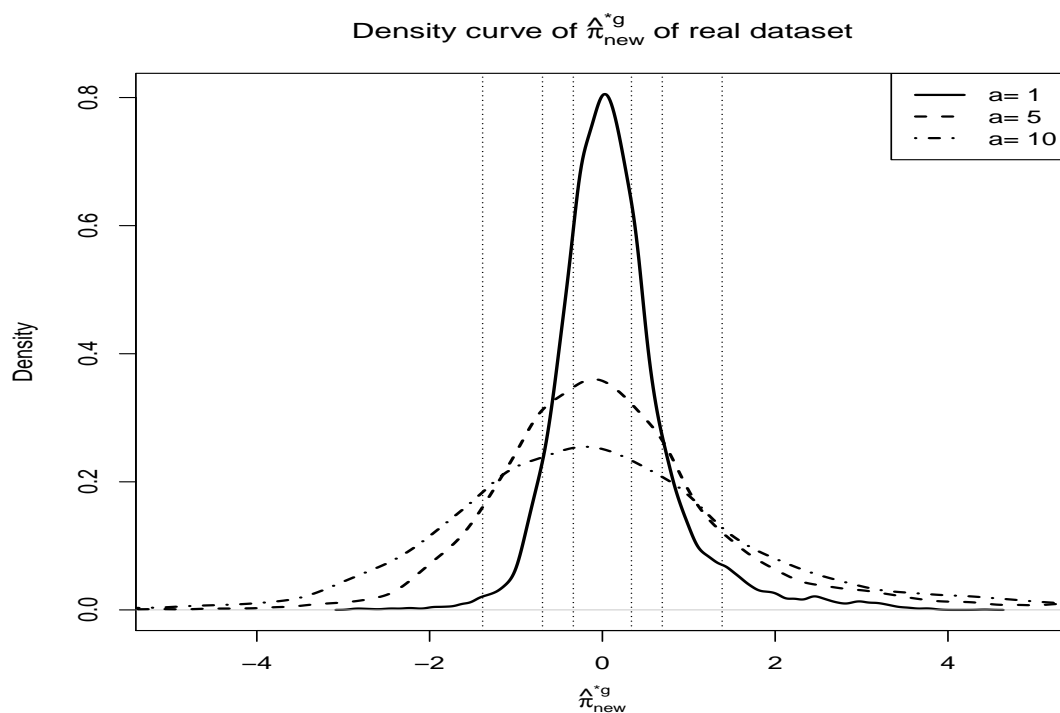

Figure S1: The scaled density curves of the method of moment estimates of  $\pi^{*g}$  based on the human tumor data by Tuch *et al.* (2010) with various scaling values ( $sqrta = 1, \sqrt{5}, \sqrt{10}$ ). The vertical dotted lines indicate Fold Change = 1.4, 2, and 4, respectively.

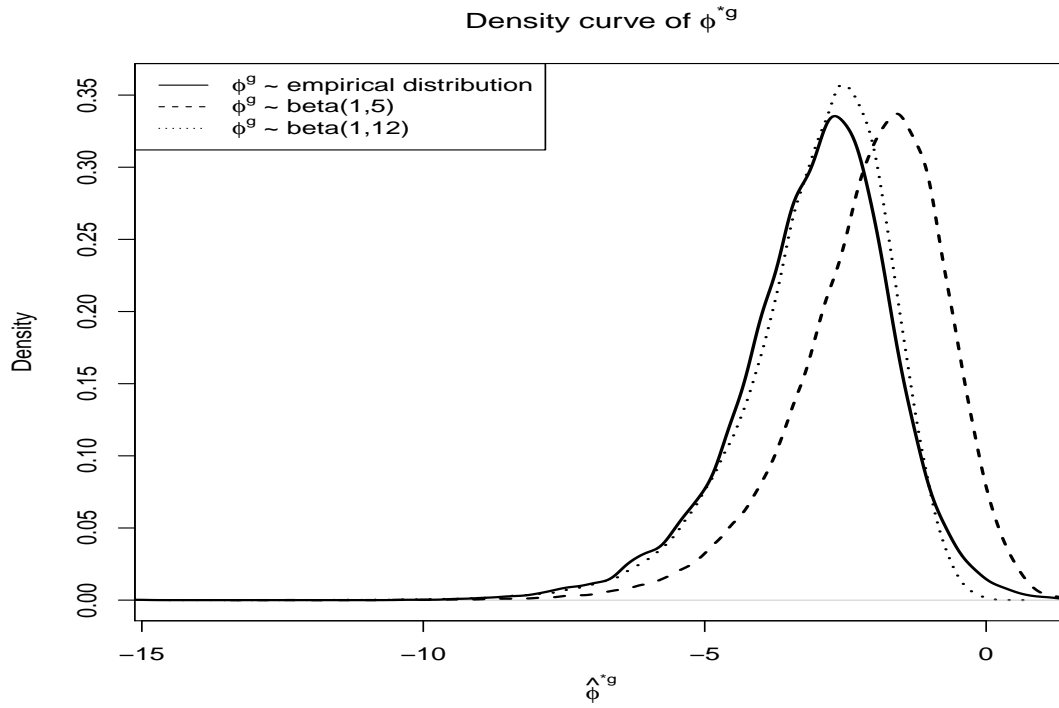

Figure S2: Density curves of  $\phi^{*g}$  (logit of  $\phi^g$ ) when  $\phi^g$  is sampled from the empirical values of the human tumor data by Tuch *et al.* (2010) and the parametric distributions of Beta(1, 5) and Beta(1, 12), respectively

## 2.2 Simulation results for identifying statistical significant DE genes

### 2.2.1 Setting SE1: $\pi_{DE}^{*g}$ is drawn from empirical distribution scaled by $\sqrt{5}$ and $\phi^g$ is drawn from empirical distribution

Actual FDR and Power comparison at nominal level 10% under setting I

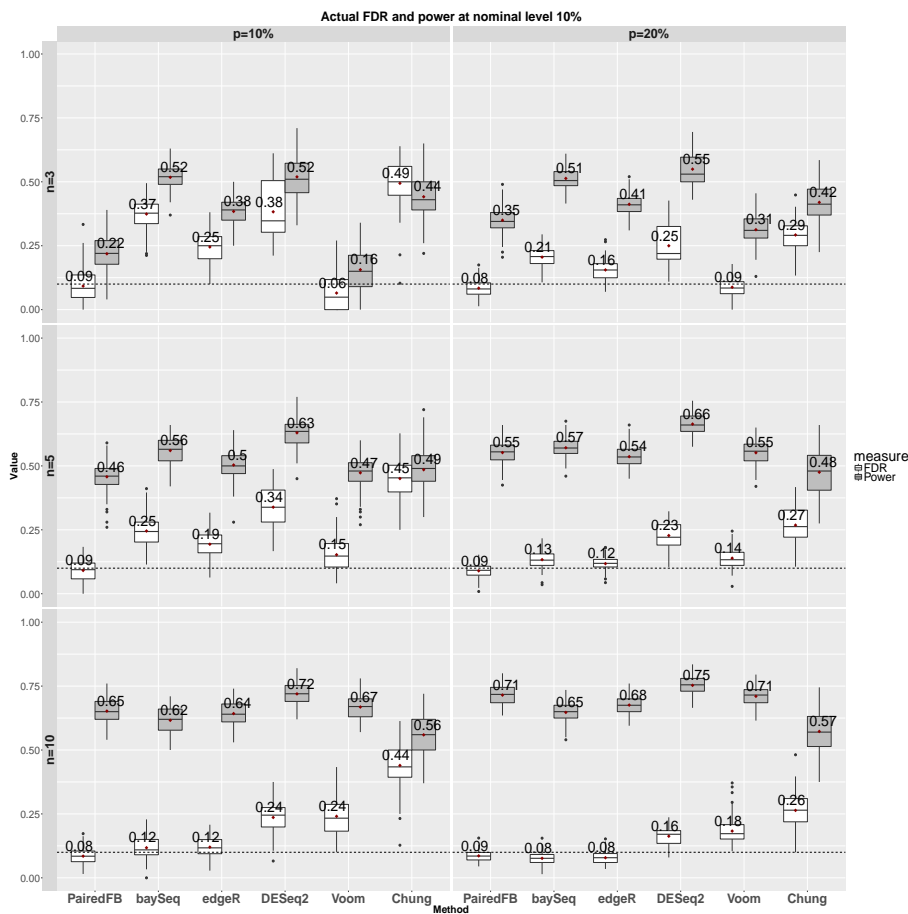

Figure S3: The boxplots of actual false discovery proportion and true detection rate over 100 simulations at nominal level 10% comparing all methods. Subplots in each row represent results for different sample sizes ( $n = 3, 5, 10$ ) and column for different DE proportions ( $p = 10\%, 20\%$ ).  $\phi^g$  and  $\pi_{DE}^{*g}$  of DE genes ( $\pi_{DE}^{*g}$ ) are sampled from Setting SE1. The numbers besides each box indicate the mean value over 100 simulations. The horizontal black dashed line in each plot outlines the 10% nominal level.

2.2.2 Setting SE2:  $\pi_{DE}^{*g}$  is drawn from empirical distribution scaled by  $\sqrt{10}$  and  $\phi^g$  is drawn from empirical distribution

Small DE proportion  $p = 10\%$  under Setting SE2

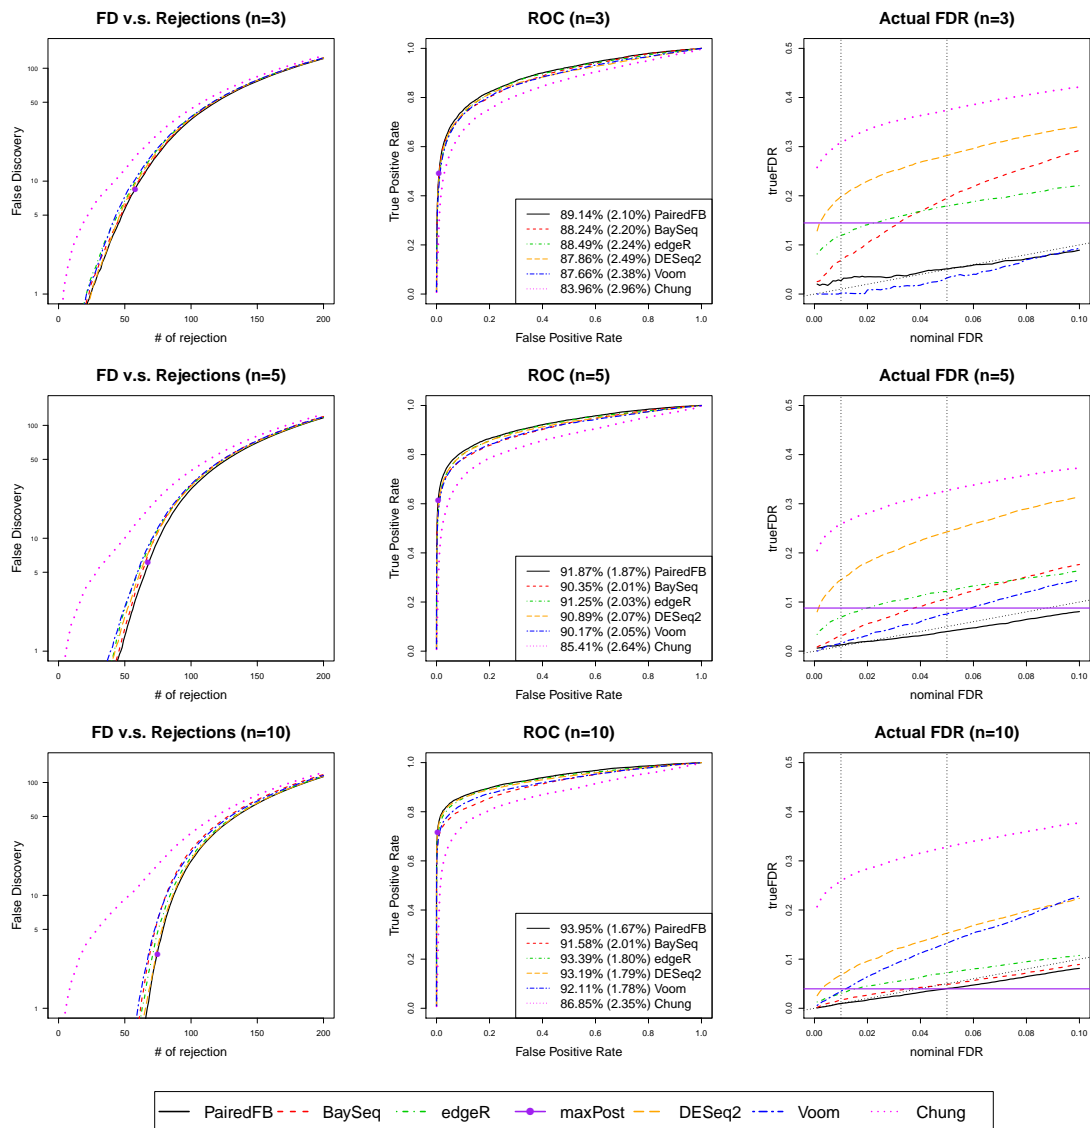

Figure S4: False discovery plots, ROC curves and the actual FDR curves comparing all methods under Setting SE2 when DE proportion  $p = 10\%$ . In the third column, the black dotted line indicates the true nominal FDR level and two vertical dotted lines indicates 1% and 5% nominal level.

Large DE proportion  $p = 20\%$  under Setting SE2

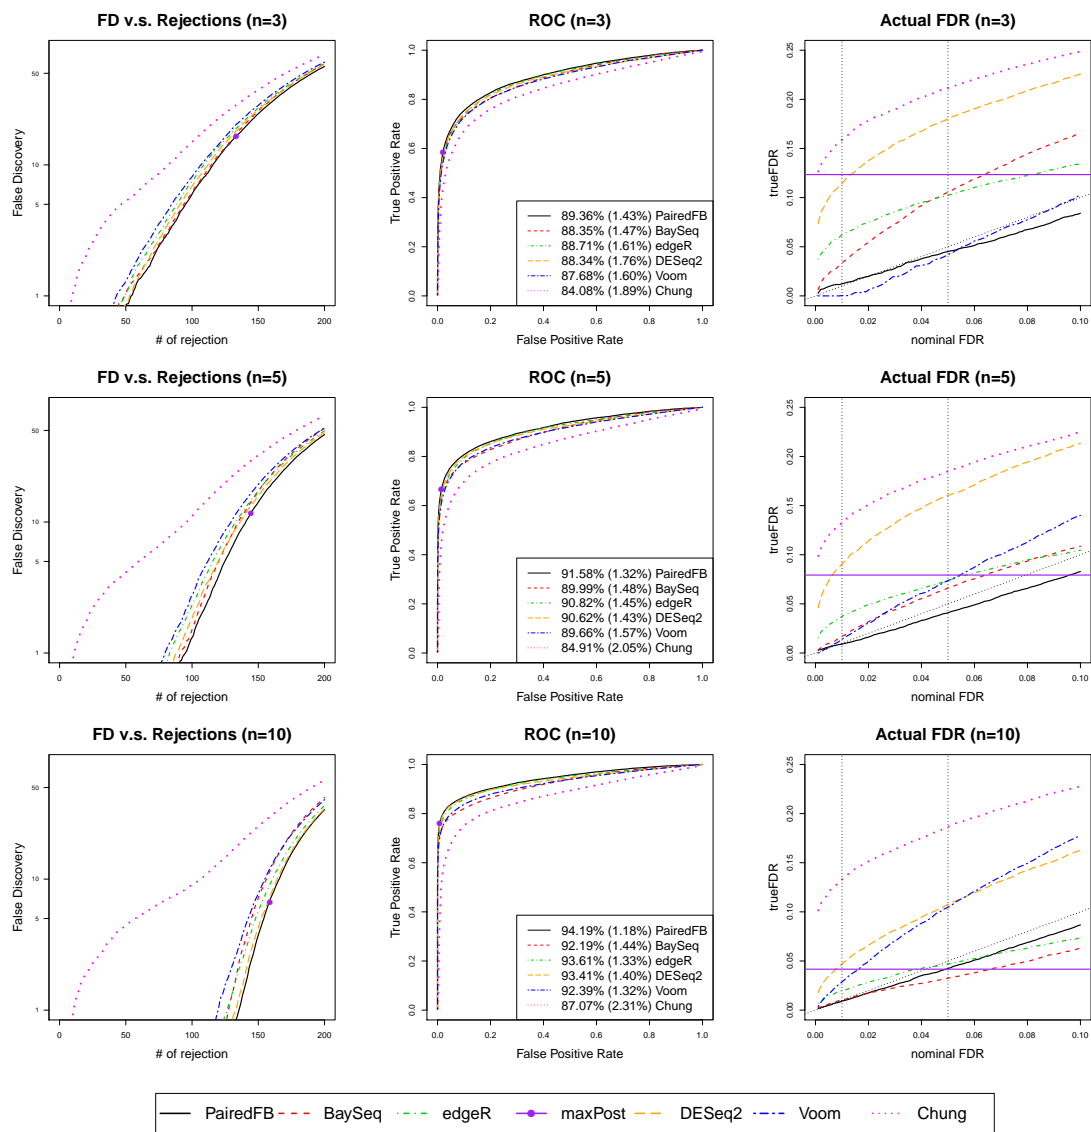

Figure S5: False discovery plots, ROC curves and the actual FDR curves comparing all methods under Setting SE2 when DE proportion  $p = 20\%$ . In the third column, the black dotted line indicates the true nominal FDR level and two vertical dotted lines indicates 1% and 5% nominal level.

Actual FDR and Power comparison at nominal level 5% under Setting SE2

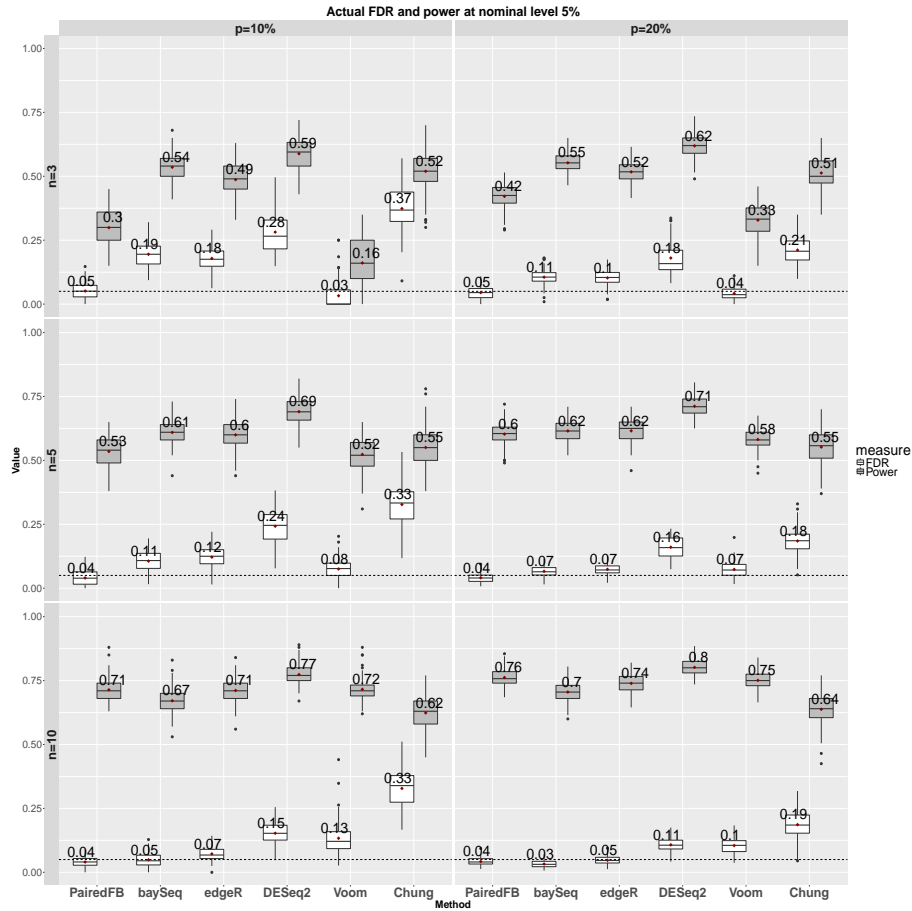

Figure S6: The box plots of the actual false discovery proportion and true detection rate over 100 simulations at nominal level 5% comparing all methods. Subplots in each row represent results for different sample sizes ( $n = 3, 5, 10$ ) and column for different DE proportions ( $p = 10\%, 20\%$ ).  $\phi^g$  and  $\pi^{*g}$  of DE genes ( $\pi_{DE}^{*g}$ ) are sampled under Setting SE2. The numbers besides each box indicate the mean value over 100 simulations. The horizontal black dashed line in each plot outlines the 5% nominal level.

## Actual FDR and Power comparison at nominal level 10% under Setting SE2

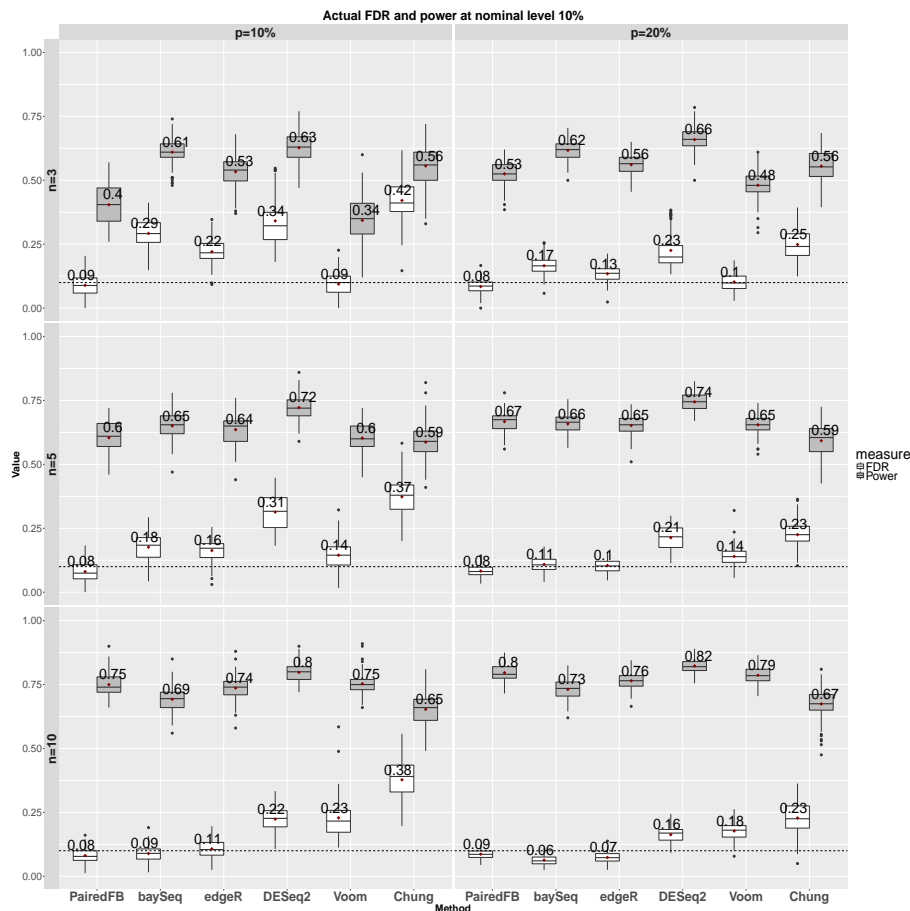

Figure S7: The box plots of the actual false discovery proportion and true detection rate over 100 simulations at nominal level 10% comparing all methods. Subplots in each row represent results for different sample sizes ( $n = 3, 5, 10$ ) and column for different DE proportions ( $p = 10\%, 20\%$ ).  $\phi^g$  and  $\pi^{*g}$  of DE genes ( $\pi_{DE}^{*g}$ ) are sampled under Setting SE2. The numbers besides each box indicate the mean value over 100 simulations. The horizontal black dashed line in each plot outlines the 10% nominal level.



2.2.3 Setting E:  $\pi_{DE}^{*g}$  is drawn from the original empirical distribution and  $\phi^g$  is drawn from empirical distribution

Small DE proportion  $p = 10\%$  under Setting E

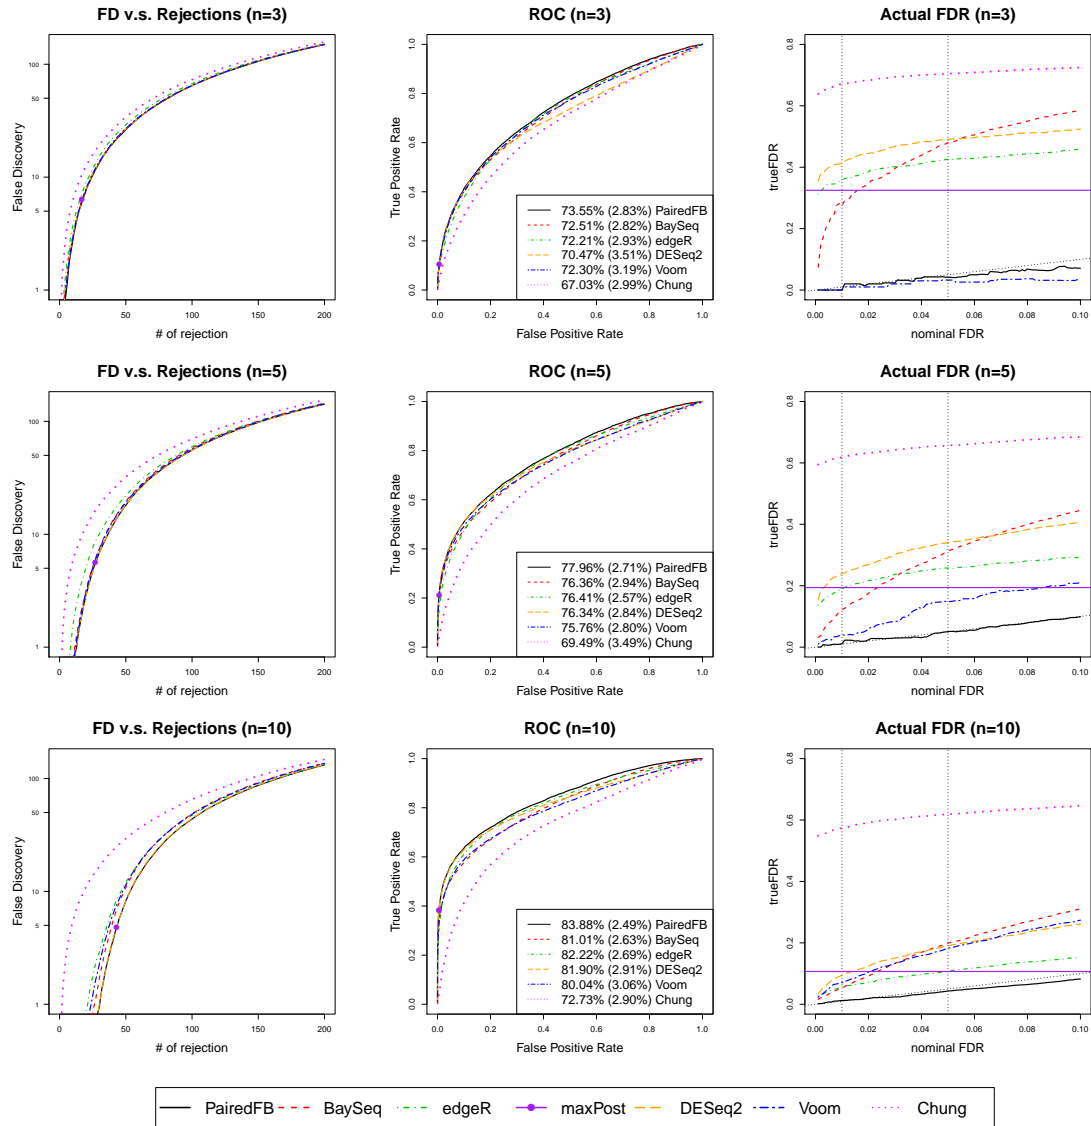

Figure S8: False discovery plots, ROC curves and the actual FDR curves comparing all methods under Setting E when DE proportion  $p = 10\%$ . In the third column, the black dotted line indicates the true nominal FDR level and two vertical dotted lines indicates 1% and 5% nominal level.

Large DE proportion  $p = 20\%$  under Setting E

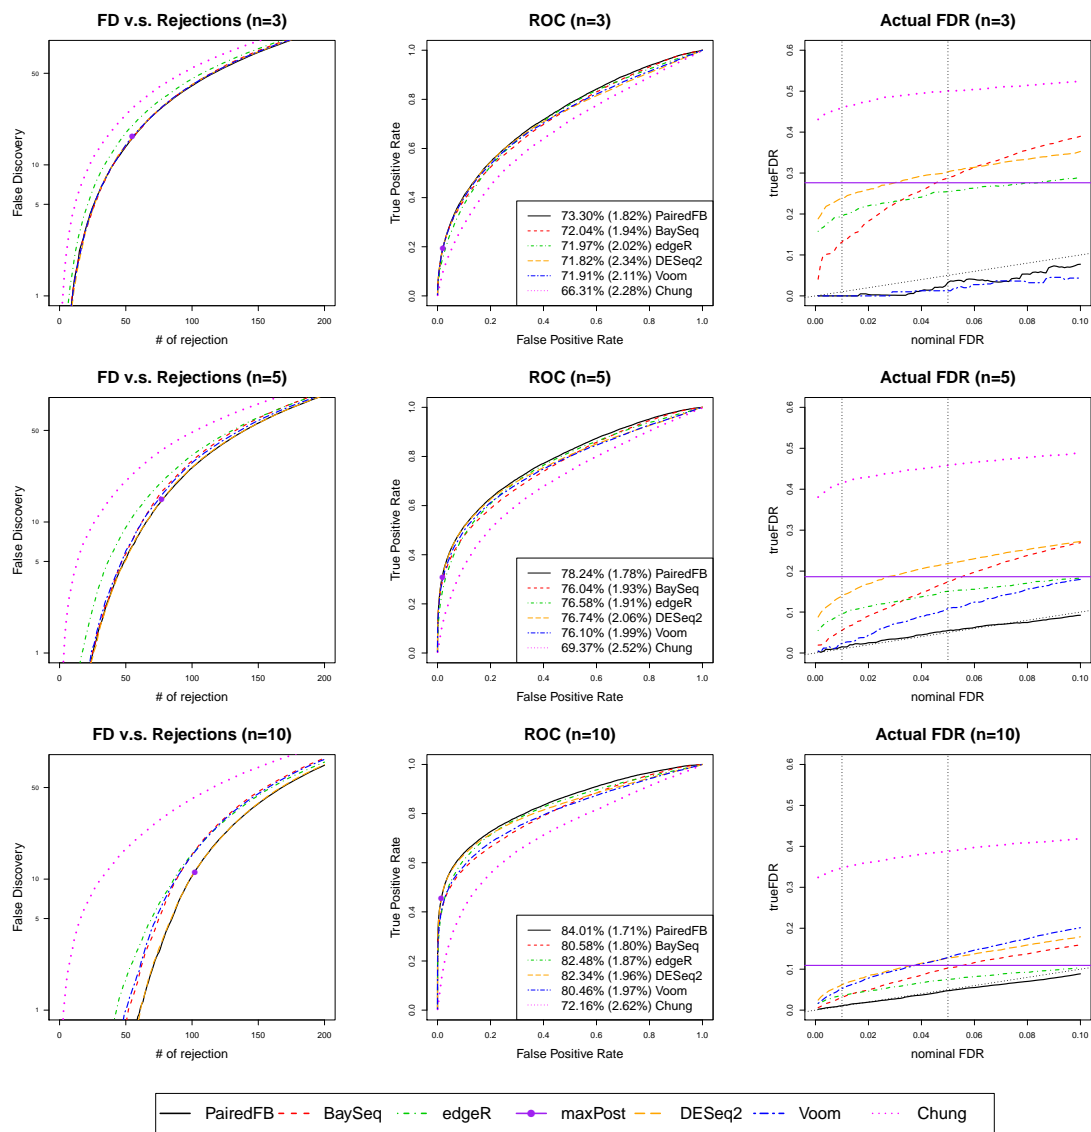

Figure S9: False discovery plots, ROC curves and the actual FDR curves comparing all methods under Setting E when DE proportion  $p = 20\%$ . In the third column, the black dotted line indicates the true nominal FDR level and two vertical dotted lines indicates 1% and 5% nominal level.

Actual FDR and Power comparison at nominal level 5% under Setting E

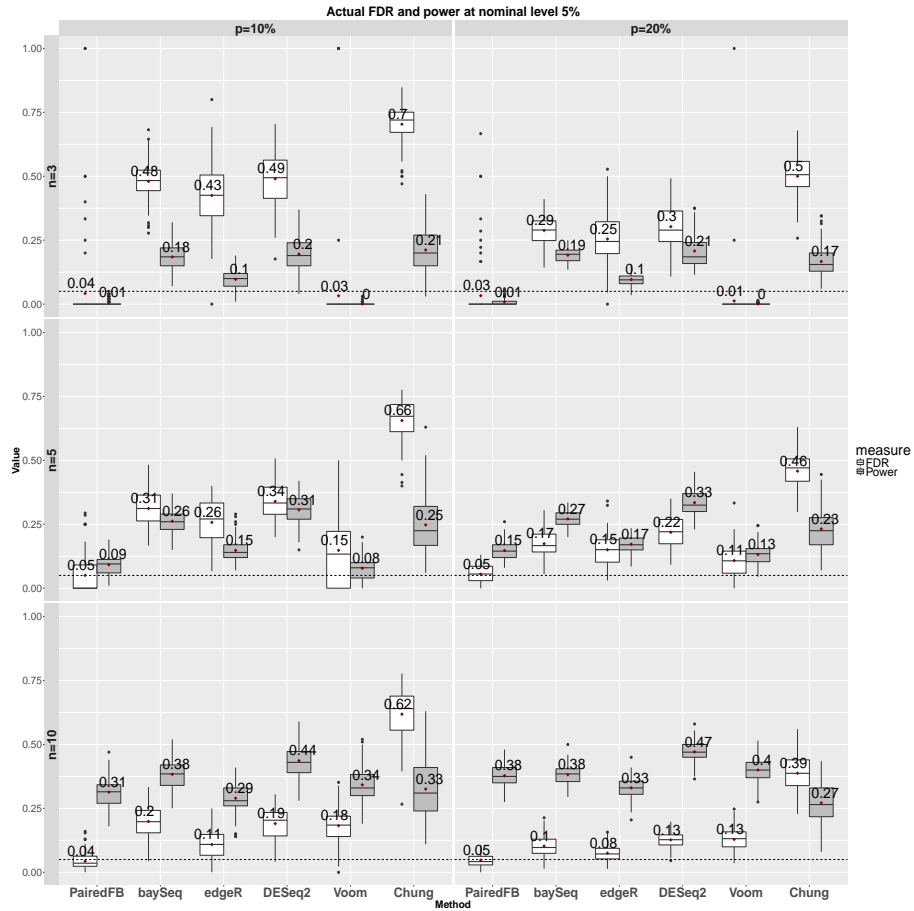

Figure S10: The box plots of the actual false discovery proportion and true detection rate over 100 simulations at nominal level 5% comparing all methods. Subplots in each row represent results for different sample sizes ( $n = 3, 5, 10$ ) and column for different DE proportions ( $p = 10\%, 20\%$ ).  $\phi^g$  and  $\pi^{*g}$  of DE genes ( $\pi_{DE}^{*g}$ ) are sampled under Setting E. The numbers besides each box indicate the mean value over 100 simulations. The horizontal black dashed line in each plot outlines the 5% nominal level.

Actual FDR and Power comparison at nominal level 10% under Setting E

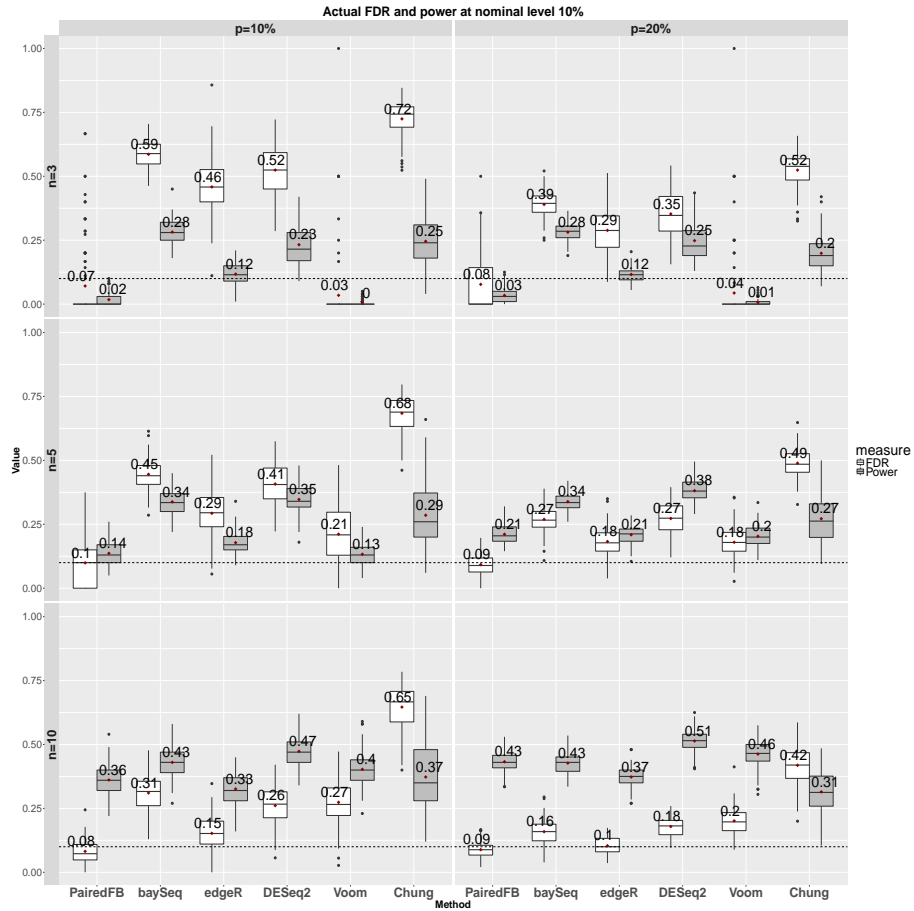

Figure S11: The box plots of the actual false discovery proportion and true detection rate over 100 simulations at nominal level 10% comparing all methods. Subplots in each row represent results for different sample sizes ( $n = 3, 5, 10$ ) and column for different DE proportions ( $p = 10\%, 20\%$ ).  $\phi^g$  and  $\pi^{*g}$  of DE genes ( $\pi_{DE}^{*g}$ ) are sampled under Setting E. The numbers besides each box indicate the mean value over 100 simulations. The horizontal black dashed line in each plot outlines the 10% nominal level.

2.2.4 Setting P1:  $\pi_{DE}^{*g} \sim N(0, 5 \times 0.68^2)$ ,  $\phi^g \sim \text{beta}(1, 12)$

Small DE proportion  $p = 10\%$  under Setting P1

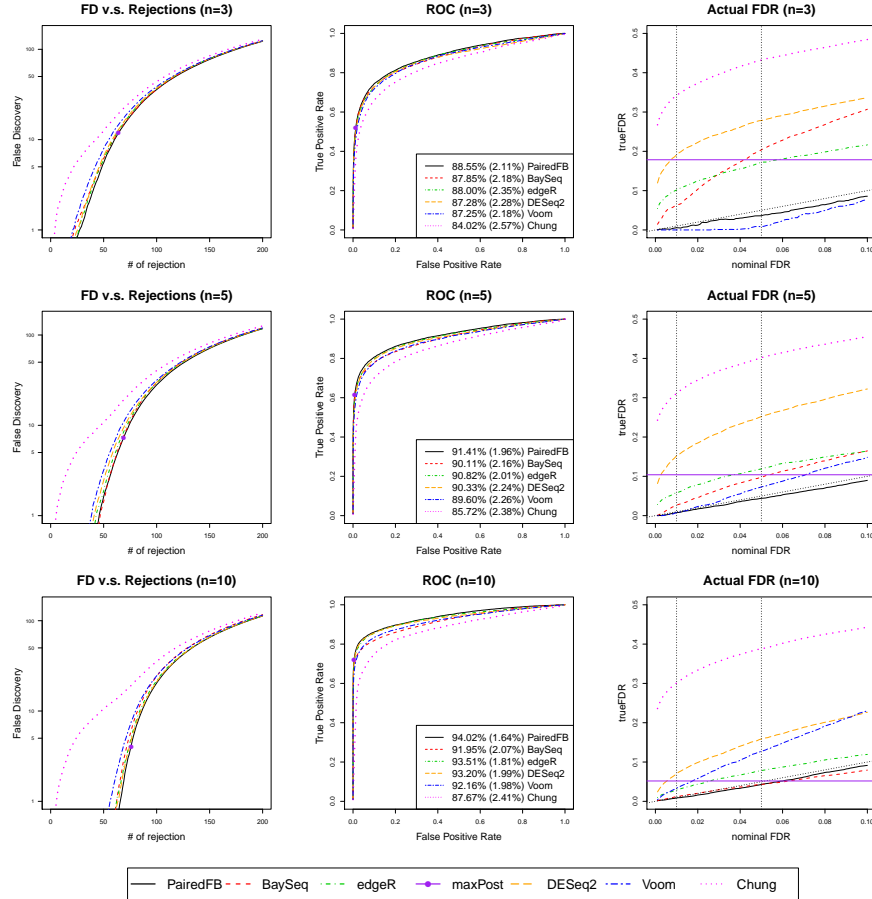

Figure S12: False discovery plots, ROC curves and the actual FDR curves comparing all methods under Setting P1 when DE proportion  $p = 10\%$ . In the third column, the black dotted line indicates the true nominal FDR level and two vertical dotted lines indicates 1% and 5% nominal level.

Large DE proportion  $p = 20\%$  under Setting P1

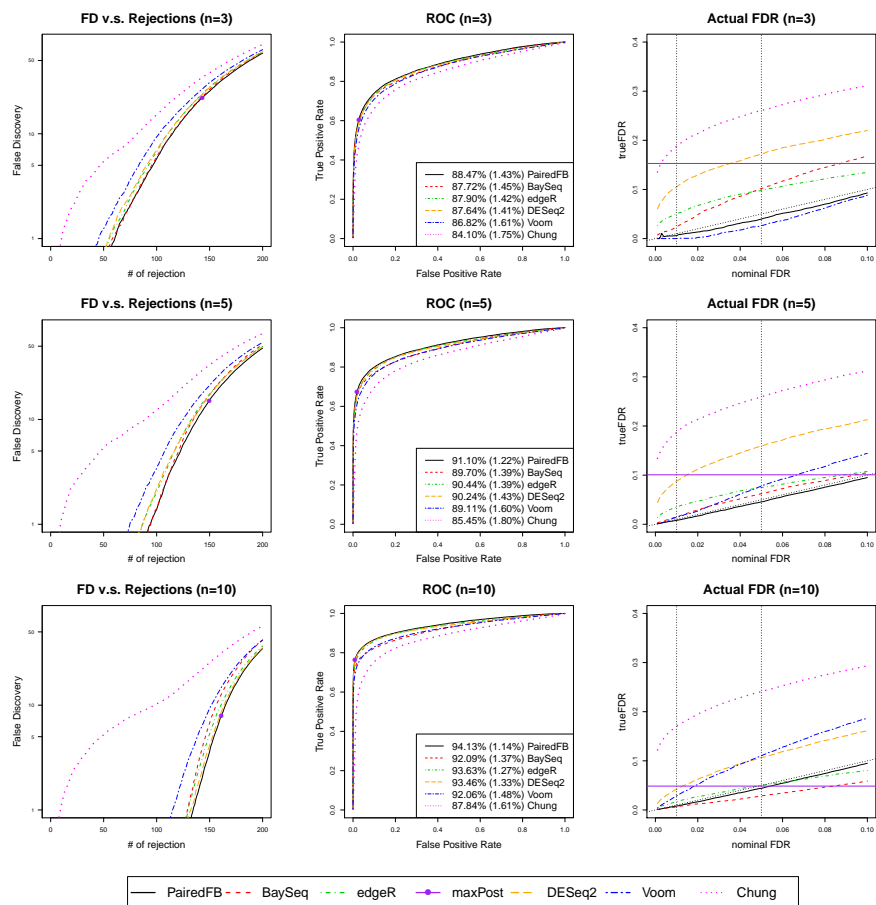

Figure S13: False discovery plots, ROC curves and the actual FDR curves comparing all methods under Setting P1 when DE proportion  $p = 20\%$ . In the third column, the black dotted line indicates the true nominal FDR level and two vertical dotted lines indicates 1% and 5% nominal level.

## Actual FDR and Power comparison at nominal level 5% under Setting P1

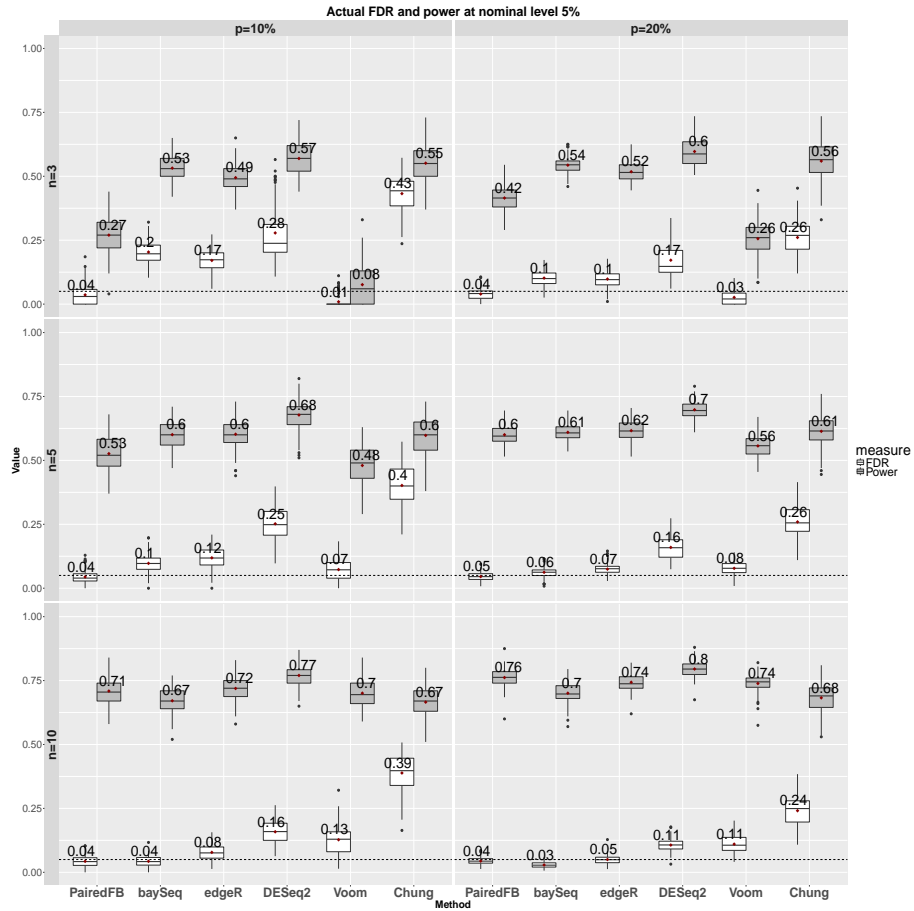

Figure S14: The box plots of the actual false discovery proportion and true detection rate over 100 simulations at nominal level 5% comparing all methods. Subplots in each row represent results for different sample sizes ( $n = 3, 5, 10$ ) and column for different DE proportions ( $p = 10\%, 20\%$ ).  $\phi^g$  and  $\pi^{*g}$  of DE genes ( $\pi_{DE}^{*g}$ ) are sampled under Setting P1. The numbers besides each box indicate the mean value over 100 simulations. The horizontal black dashed line in each plot outlines the 5% nominal level.

Actual FDR and Power comparison at nominal level 10% under Setting P1

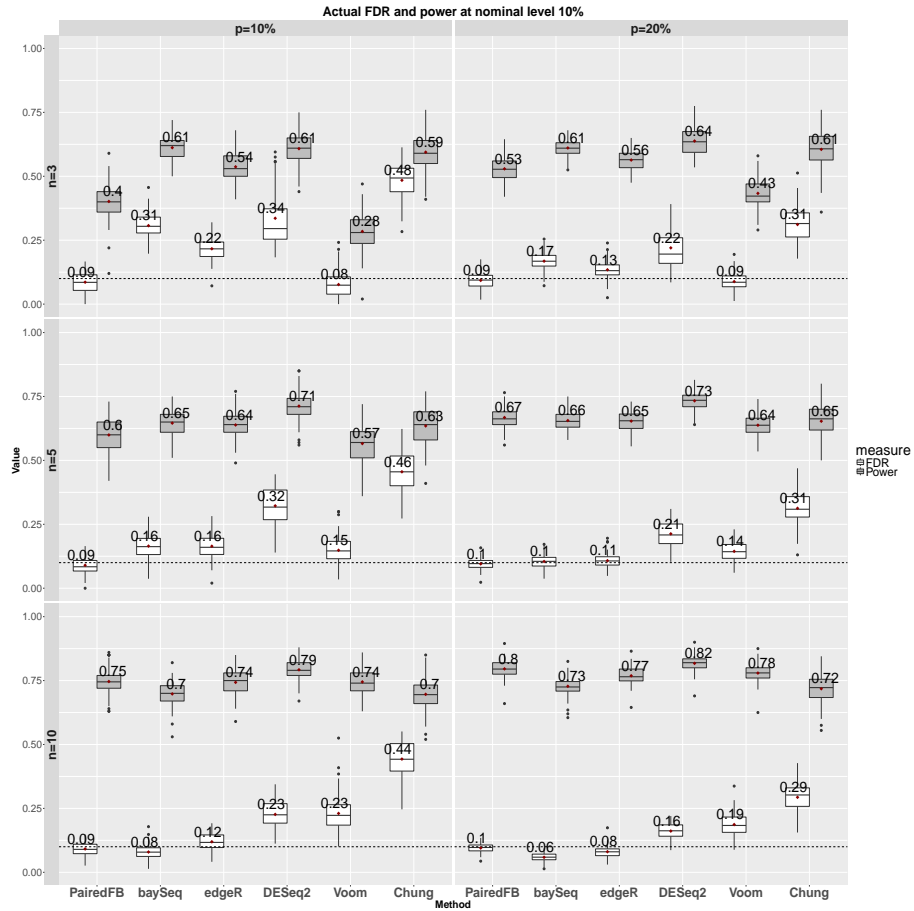

Figure S15: The box plots of the actual false discovery proportion and true detection rate over 100 simulations at nominal level 10% comparing all methods. Subplots in each row represent results for different sample sizes ( $n = 3, 5, 10$ ) and column for different DE proportions ( $p = 10\%, 20\%$ ).  $\phi^g$  and  $\pi^{*g}$  of DE genes ( $\pi_{DE}^{*g}$ ) are sampled under Setting P1. The numbers besides each box indicate the mean value over 100 simulations. The horizontal black dashed line in each plot outlines the 10% nominal level.



2.2.5 Setting P2:  $\pi_{DE}^{*g} \sim N(0, 5 \times 0.68^2)$ ,  $\phi^g \sim \text{beta}(1, 5)$

Small DE proportion  $p = 10\%$

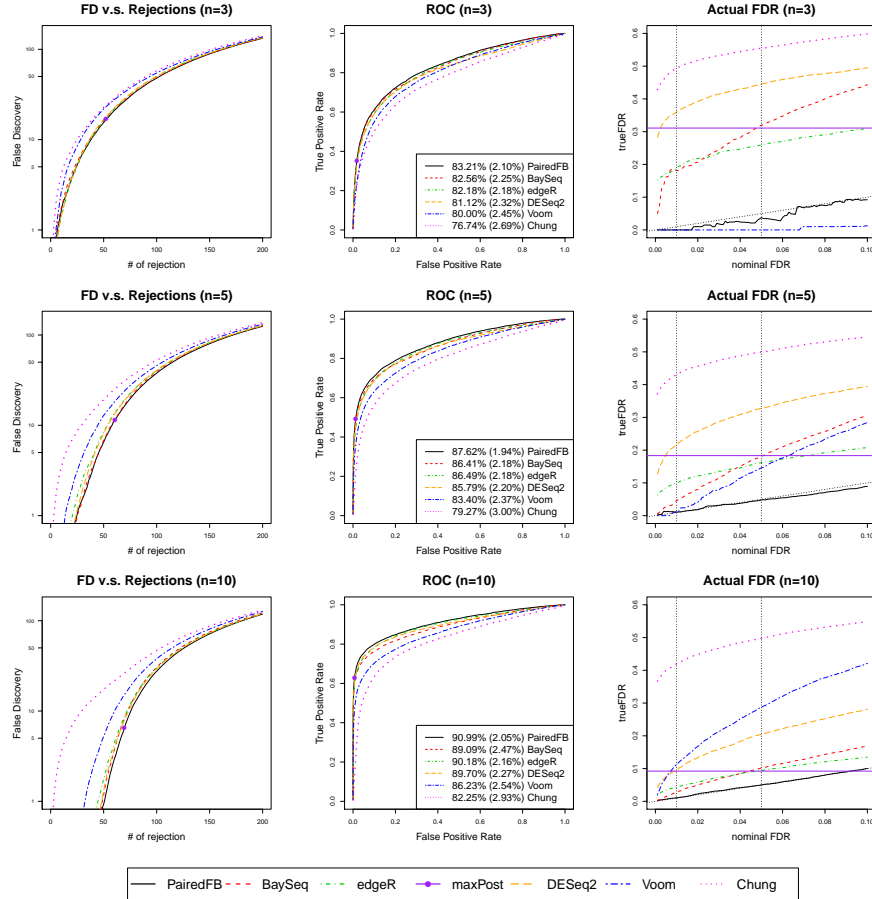

Figure S16: False discovery plots, ROC curves and the actual FDR curves comparing all methods under Setting P2 when DE proportion  $p = 10\%$ . In the third column, the black dotted line indicates the true nominal FDR level and two vertical dotted lines indicates 1% and 5% nominal level.

Large DE proportion  $p = 20\%$

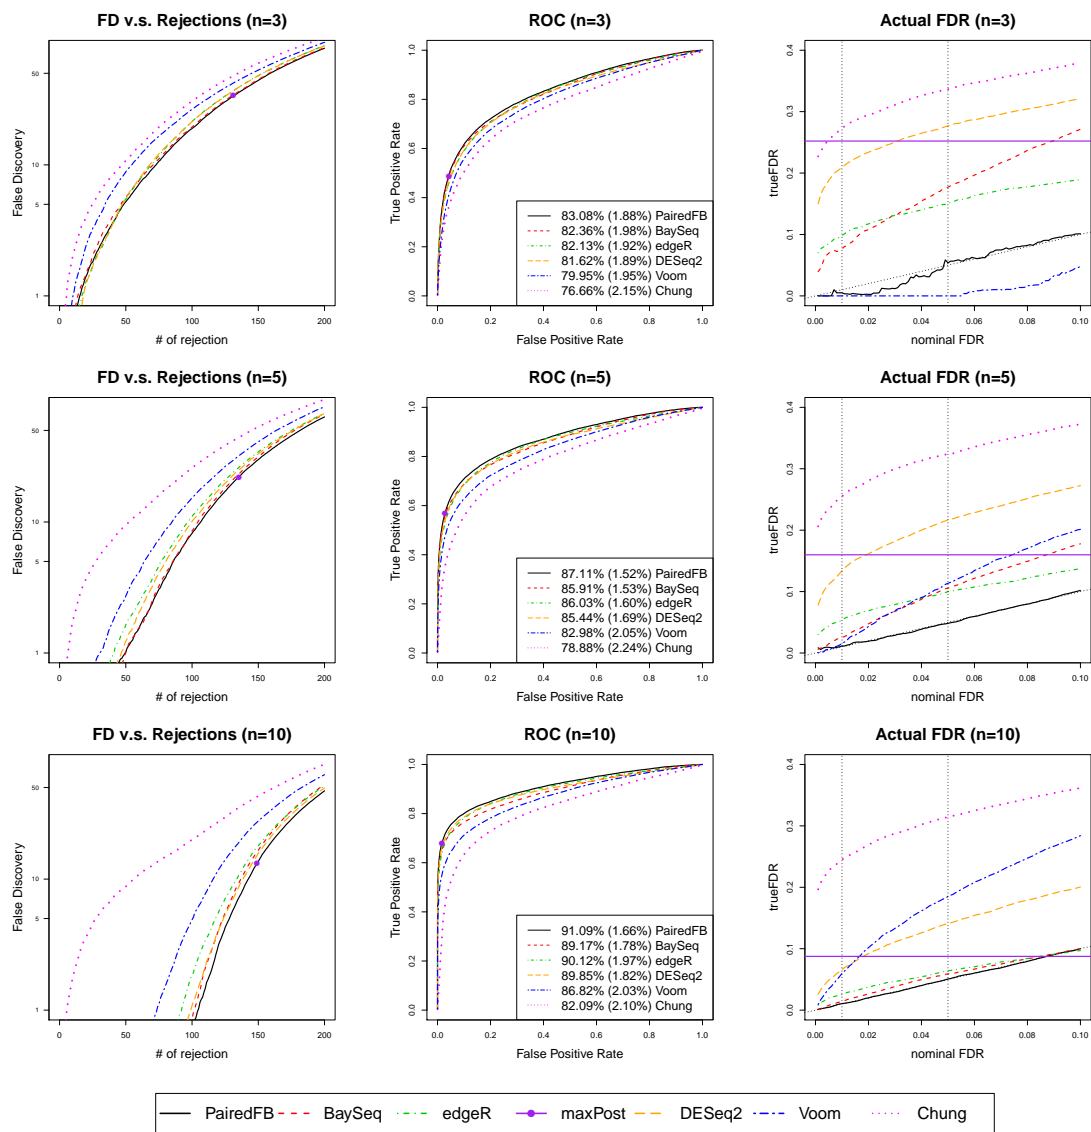

Figure S17: False discovery plots, ROC curves and the actual FDR curves comparing all methods under Setting P2 when DE proportion  $p = 20\%$ . In the third column, the black dotted line indicates the true nominal FDR level and two vertical dotted lines indicates 1% and 5% nominal level.

## Actual FDR and Power comparison at nominal level 5% under Setting P2

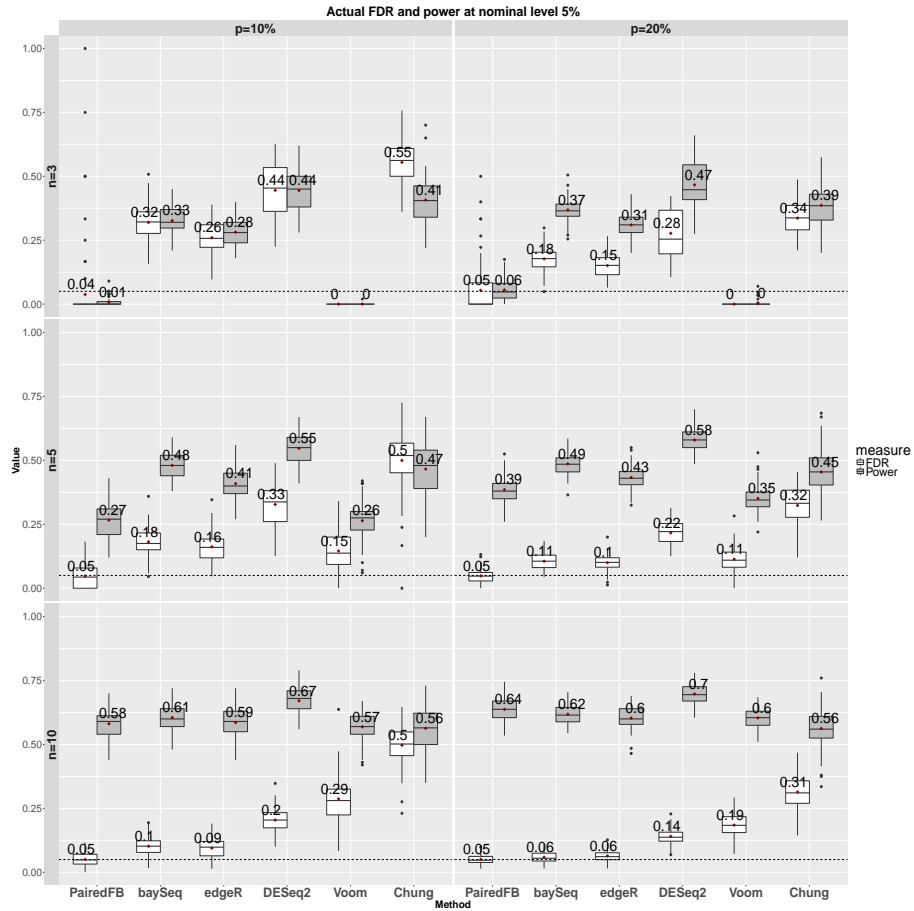

Figure S18: The box plots of the actual false discovery proportion and true detection rate over 100 simulations at nominal level 5% comparing all methods. Subplots in each row represent results for different sample sizes ( $n = 3, 5, 10$ ) and column for different DE proportions ( $p = 10\%, 20\%$ ).  $\phi^g$  and  $\pi^{*g}$  of DE genes ( $\pi_{DE}^{*g}$ ) are sampled under Setting P2. The numbers besides each box indicate the mean value over 100 simulations. The horizontal black dashed line in each plot outlines the 5% nominal level.

Actual FDR and Power comparison at nominal level 10% under Setting P2

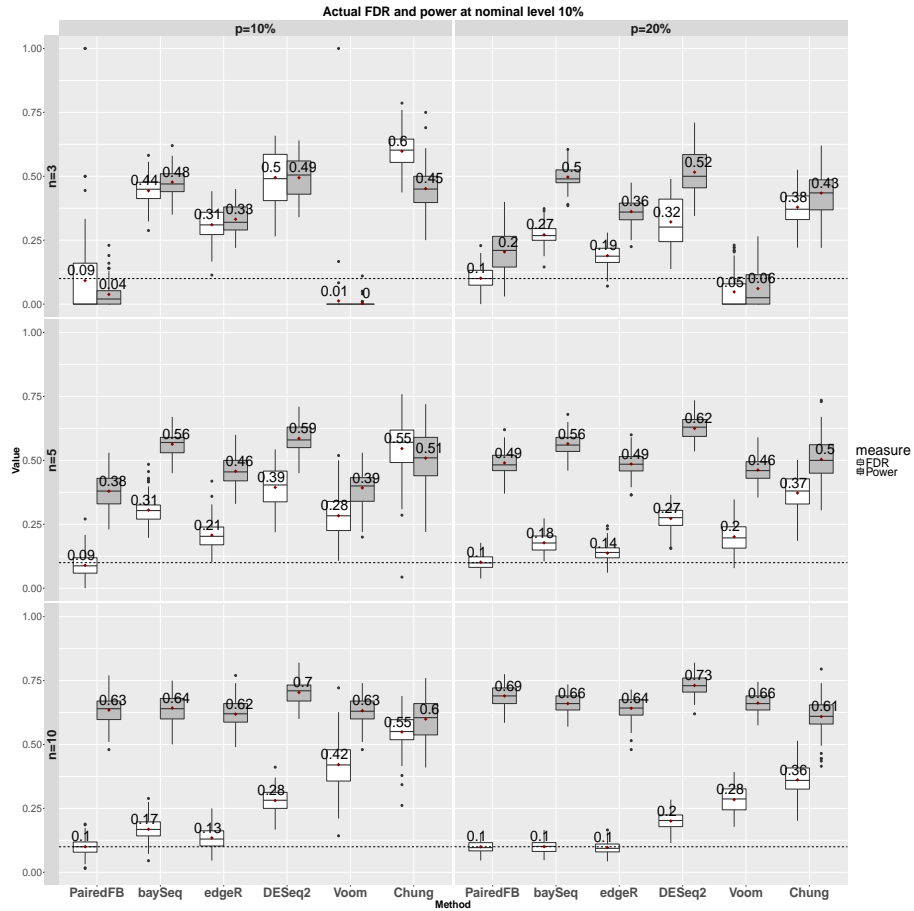

Figure S19: The box plots of the actual false discovery proportion and true detection rate over 100 simulations at nominal level 10% comparing all methods. Subplots in each row represent results for different sample sizes ( $n = 3, 5, 10$ ) and column for different DE proportions ( $p = 10\%, 20\%$ ).  $\phi^g$  and  $\pi^{*g}$  of DE genes ( $\pi_{DE}^{*g}$ ) are sampled under Setting P2. The numbers besides each box indicate the mean value over 100 simulations. The horizontal black dashed line in each plot outlines the 10% nominal level.

## 2.3 Simulation results for identifying biological significant DE genes

### 2.3.1 Setting SE1: $\pi_{DE}^{*g}$ is drawn from empirical distribution scaled by $\sqrt{5}$ and $\phi^g$ is drawn from empirical distribution

Small DE proportion  $p = 10\%$

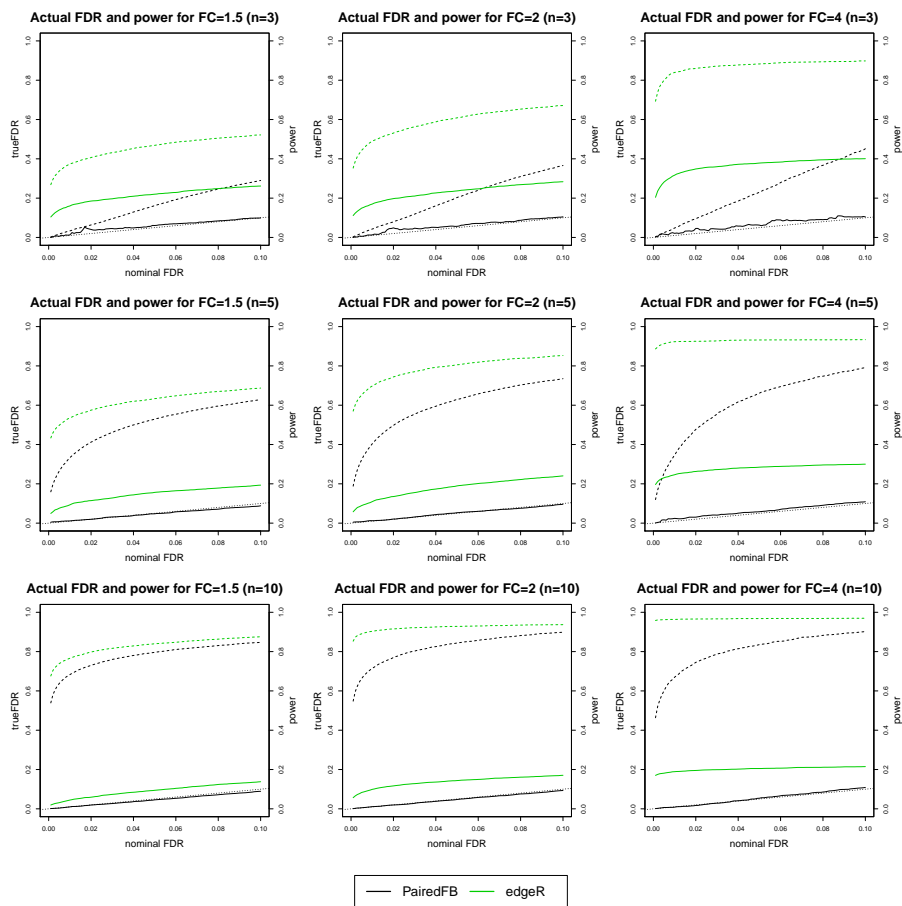

Figure S20: The actual FDR and power curves of the PairedFB and the two-stage edgeR procedure. Subplots in each row represent results for different sample sizes ( $n = 3, 5, 10$ ) and column for different fold change thresholds to define the biological significance (FC= 1.5, 2, 4).  $\phi^g$  and  $\pi_{DE}^{*g}$  of DE genes ( $\pi_{DE}^{*g}$ ) are sampled under Setting SE1 and DE proportion  $p = 10\%$ .

Large DE proportion  $p = 20\%$

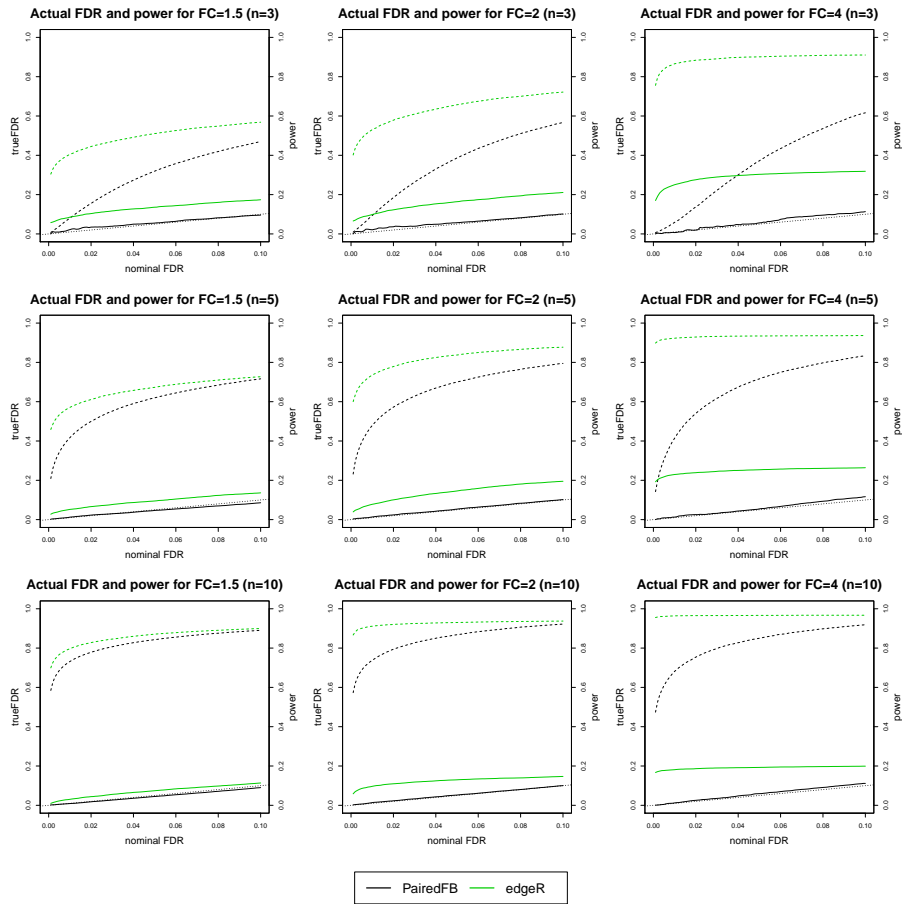

Figure S21: The actual FDR and power curves of the PairedFB and the two-stage edgeR procedure. Subplots in each row represent results for different sample sizes ( $n = 3, 5, 10$ ) and column for different fold change thresholds to define the biological significance (FC= 1.5, 2, 4).  $\phi^g$  and  $\pi^{*g}$  of DE genes ( $\pi_{DE}^{*g}$ ) are sampled under Setting SE1 and DE proportion  $p = 20\%$ .

### 2.3.2 Setting SE2: $\pi_{DE}^{*g}$ is drawn from empirical distribution scaled by $\sqrt{10}$ and $\phi^g$ is drawn from empirical distribution

Small DE proportion  $p = 10\%$

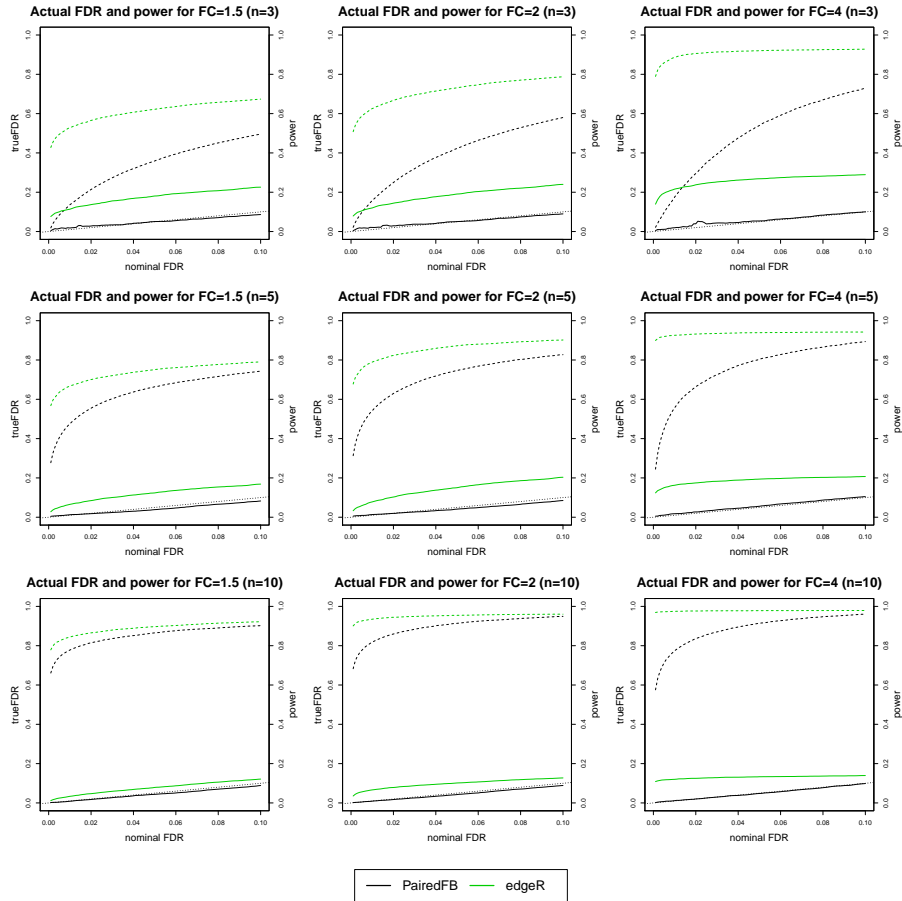

Figure S22: The actual FDR and power curves of the PairedFB and the two-stage edgeR procedure. Subplots in each row represent results for different sample sizes ( $n = 3, 5, 10$ ) and column for different fold change thresholds to define the biological significance ( $FC = 1.5, 2, 4$ ).  $\phi^g$  and  $\pi_{DE}^{*g}$  of DE genes ( $\pi_{DE}^{*g}$ ) are sampled under Setting SE2 and DE proportion  $p = 10\%$ .

Large DE proportion  $p = 20\%$

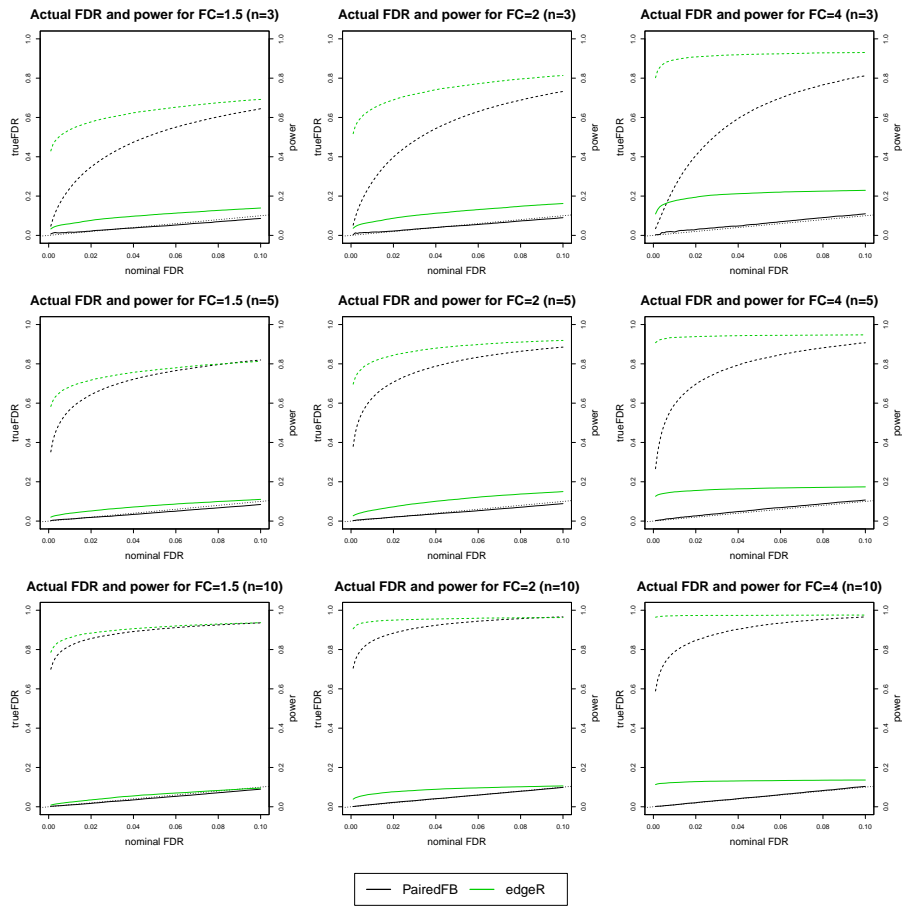

Figure S23: The actual FDR and power curves of the PairedFB and the two-stage edgeR procedure. Subplots in each row represent results for different sample sizes ( $n = 3, 5, 10$ ) and column for different fold change thresholds to define the biological significance ( $FC = 1.5, 2, 4$ ).  $\phi^g$  and  $\pi^{*g}$  of DE genes ( $\pi_{DE}^{*g}$ ) are sampled under Setting SE2 and DE proportion  $p = 20\%$ .



Actual FDR and power comparison at nominal level 5% under Setting SE2

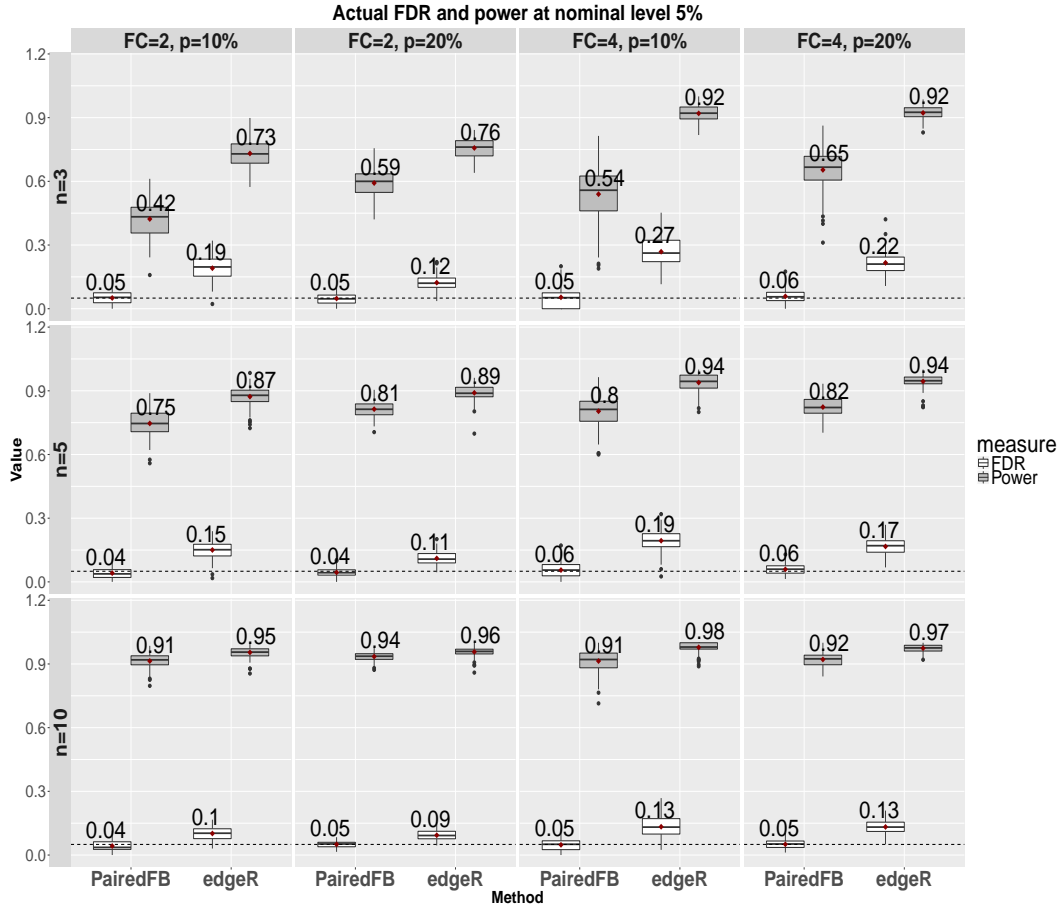

Figure S24: The box plots of the actual false discovery proportion and true detection rate over 100 simulations at nominal level 5% comparing PairedFB and the two-stage edgeR procedure. Subplots in each row represent results for different sample sizes ( $n = 3, 5, 10$ ) and column for different DE proportions ( $p = 10\%, 20\%$ ).  $\phi^g$  and  $\pi^{*g}$  of DE genes ( $\pi_{DE}^{*g}$ ) are sampled under Setting SE2. The numbers besides each box indicate the mean value over 100 simulations. The horizontal black dashed line in each plot outlines the 5% nominal level.

## 2.4 Simulation results for robustness test

2.4.1 Setting SE1:  $\pi_{DE}^{*g}$  is drawn from empirical distribution scaled by  $\sqrt{5}$  and  $\phi^g$  is drawn from empirical distribution.

Small DE proportion  $p = 10\%$

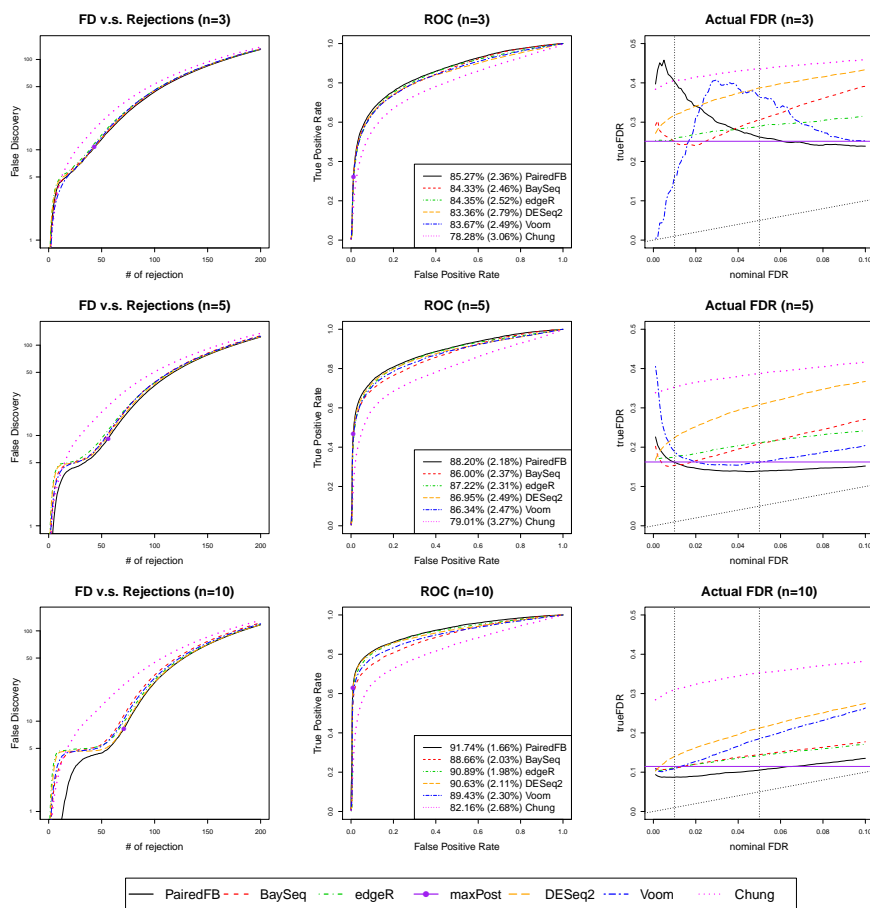

Figure S25: False discovery plots, ROC curves and the actual FDR curves when data is generated from Poisson-minimax mixture. Parameters of the minimax distribution match the  $\phi^g$  and  $\pi_{DE}^{*g}$  sampled from empirical Setting SE1. DE proportion is  $p = 10\%$ . In the third column, black dotted line indicating the true nominal FDR level and two vertical dotted lines indicate 1% and 5% nominal level.

Large DE proportion  $p = 20\%$ .

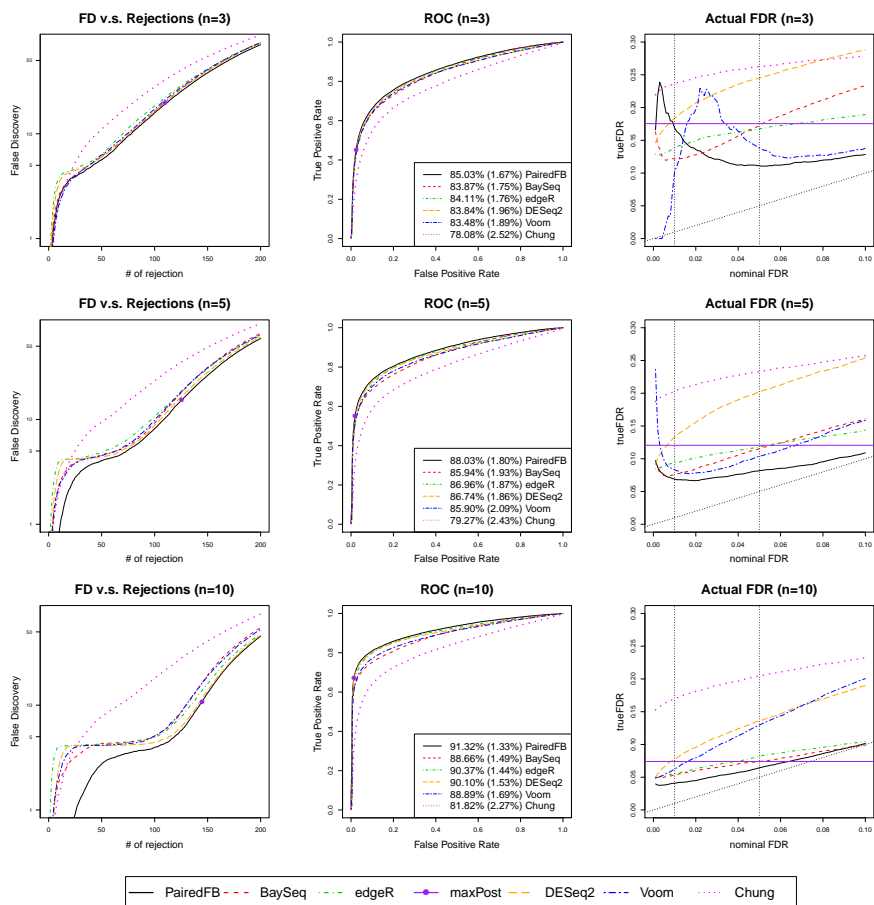

Figure S26: False discovery plots, ROC curves and the actual FDR curves when data is generated from Poisson-minimax mixture. Parameters of the minimax distribution match the  $\phi^g$  and  $\pi_{DE}^{*g}$  sampled from empirical Setting SE1. DE proportion is  $p = 20\%$ . In the third column, black dotted line indicating the true nominal FDR level and two vertical dotted lines indicate 1% and 5% nominal level.

Actual FDR and Power comparison at nominal level 5% under Setting SE1

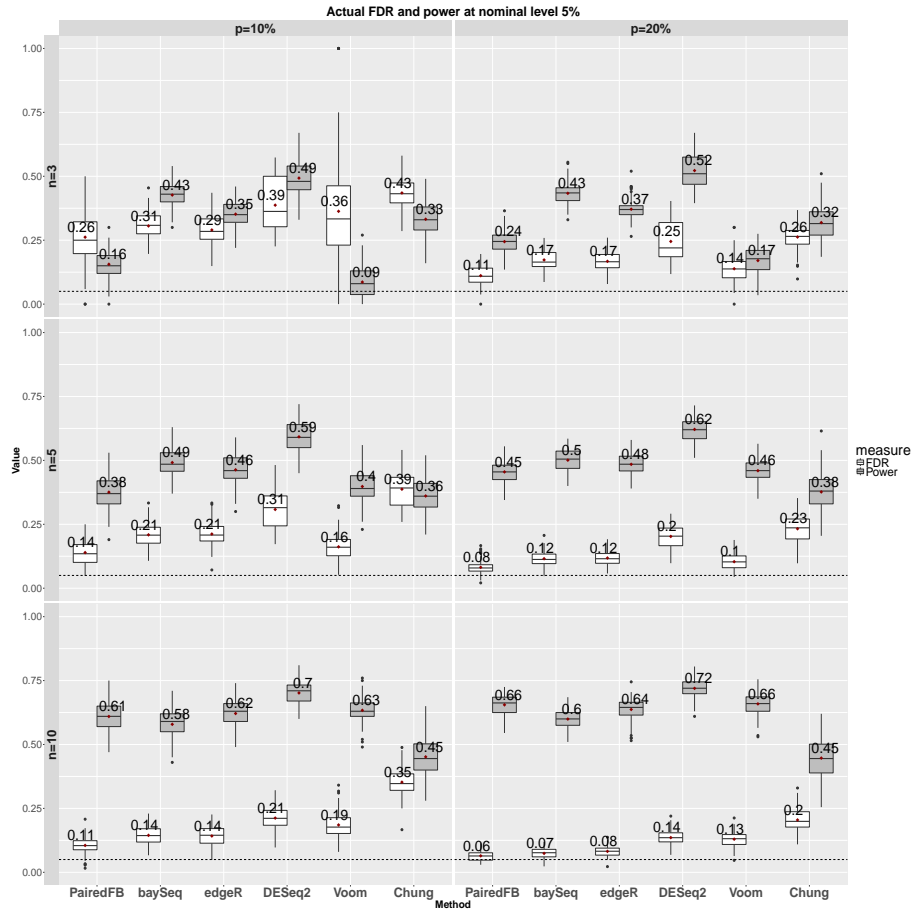

Figure S27: The box plots of the actual false discovery proportion and true detection rate over 100 simulations at nominal level 5% comparing all methods when data is generated from Poisson-minimax mixture. Subplots in each row represent results for different sample sizes ( $n = 3, 5, 10$ ) and column for different DE proportions ( $p = 5\%, 20\%$ ). Parameters of the minimax distribution match the  $\phi^g$  and  $\pi^{*g}$  of DE genes ( $\pi_{DE}^{*g}$ ) sampled from empirical setting I. The numbers besides each box indicate the mean value over 100 simulations. The horizontal black dashed line in each plot outlines the 5% nominal level.

## Actual FDR and Power comparison at nominal level 10% under Setting SE1

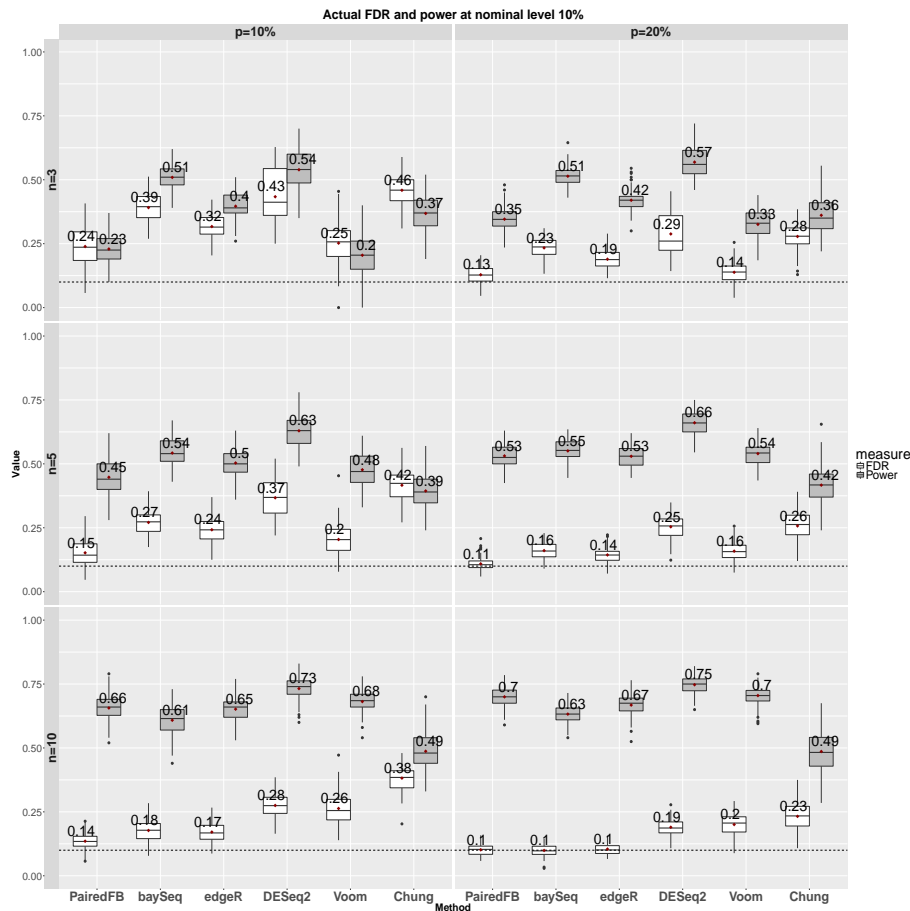

Figure S28: The box plots of the actual false discovery proportion and true detection rate over 100 simulations at nominal level 5% comparing all methods when data is generated from Poisson-minimax mixture. Subplots in each row represent results for different sample sizes ( $n = 3, 5, 10$ ) and column for different DE proportions ( $p = 5\%, 20\%$ ). Parameters of the minimax distribution match the  $\phi^g$  and  $\pi^{*g}$  of DE genes ( $\pi_{DE}^{*g}$ ) sampled from empirical setting I. The numbers besides each box indicate the mean value over 100 simulations. The horizontal black dashed line in each plot outlines the 10% nominal level.

2.4.2 Setting SE2:  $\pi_{DE}^{*g}$  is drawn from empirical distribution scaled by  $\sqrt{10}$  and  $\phi^g$  is drawn from empirical distribution.

Small DE proportion  $p = 10\%$

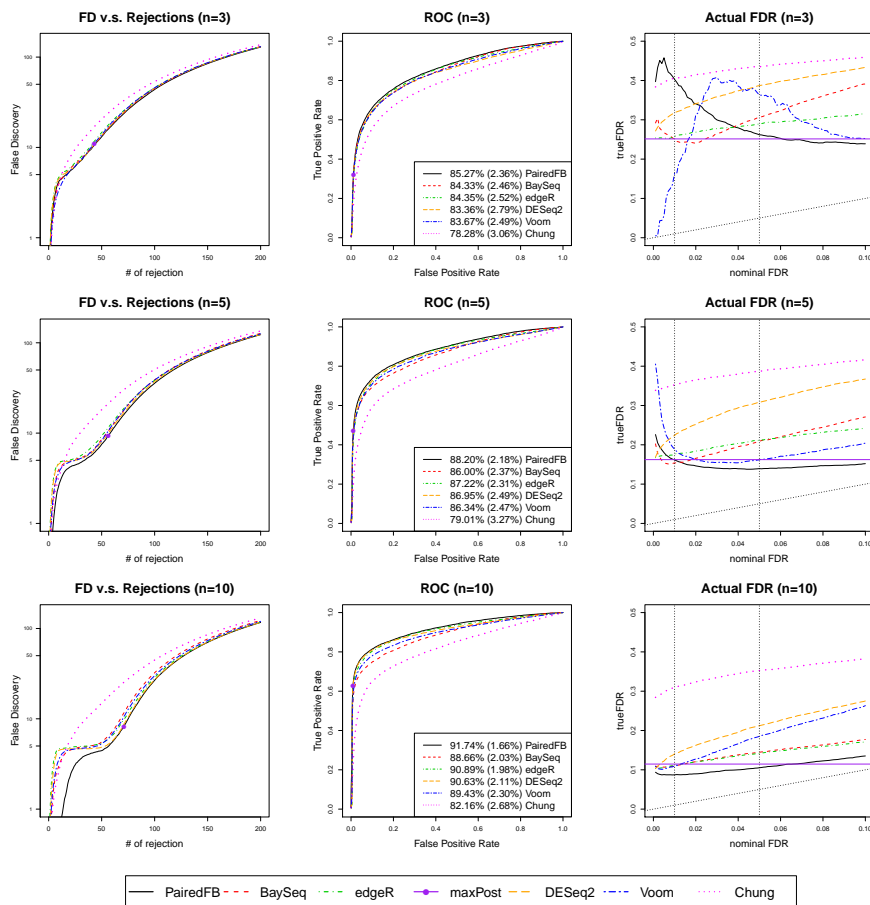

Figure S29: False discovery plots, ROC curves and the actual FDR curves when data is generated from Poisson-minimax mixture. Parameters of the minimax distribution match the  $\phi^g$  and  $\pi_{DE}^{*g}$  sampled from empirical Setting SE2. DE proportion is  $p = 10\%$ . In the third column, black dotted line indicating the true nominal FDR level and two vertical dotted lines indicate 1% and 5% nominal level.

Large DE proportion  $p = 20\%$



Figure S30: False discovery plots, ROC curves and the actual FDR curves when data is generated from Poisson-minimax mixture. Parameters of the minimax distribution match the  $\phi^g$  and  $\pi_{DE}^{*g}$  sampled from empirical Setting SE1. DE proportion is  $p = 20\%$ . In the third column, black dotted line indicating the true nominal FDR level and two vertical dotted lines indicate 1% and 5% nominal level.

Actual FDR and Power comparison at nominal level 5% under Setting SE2

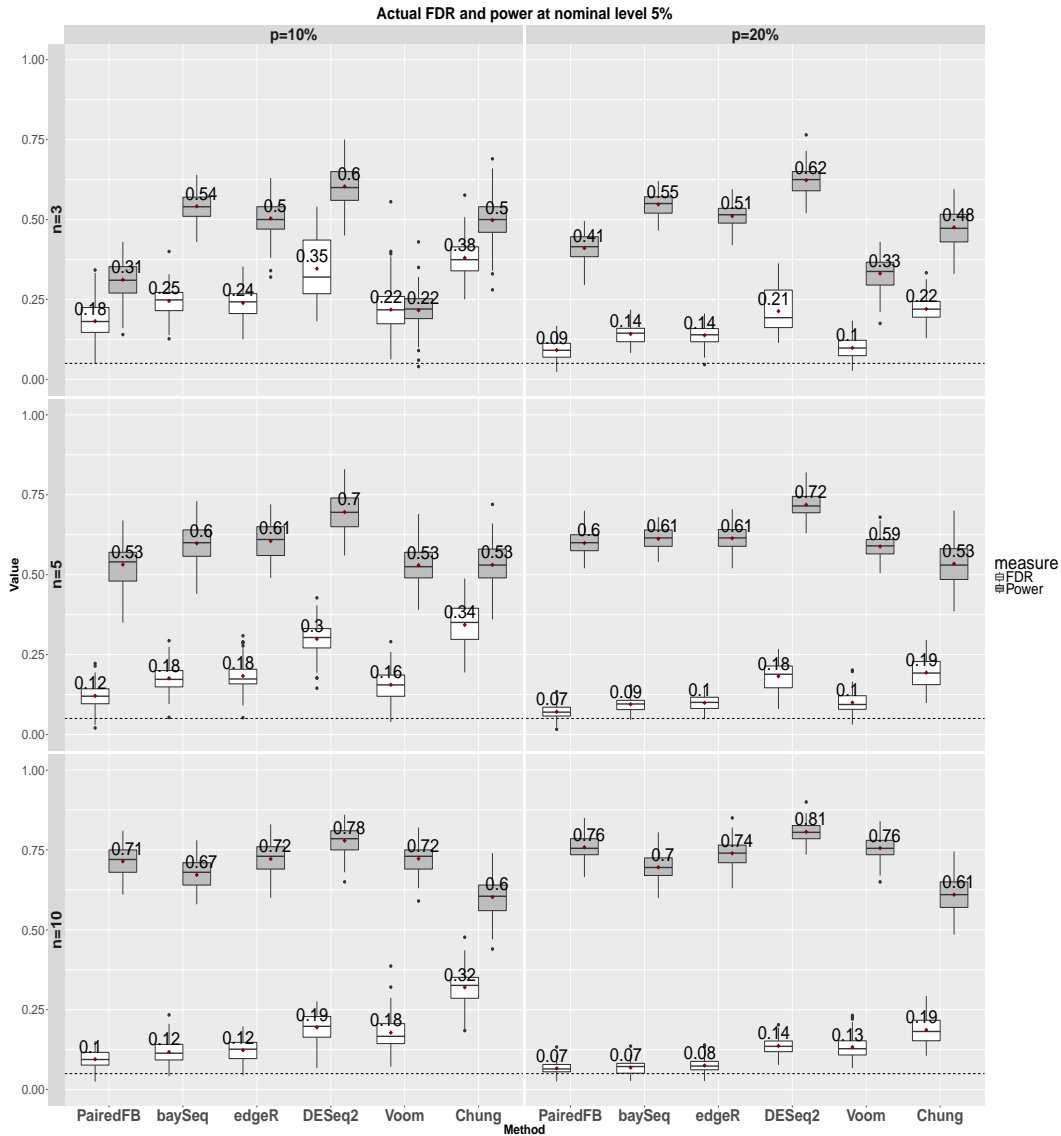

Figure S31: The box plots of the actual false discovery proportion and true detection rate over 100 simulations at nominal level 5% comparing all methods when data is generated from Poisson-minimax mixture. Subplots in each row represent results for different sample sizes ( $n = 3, 5, 10$ ) and column for different DE proportions ( $p = 5\%, 20\%$ ). Parameters of the minimax distribution match the  $\phi^g$  and  $\pi^{*g}$  of DE genes ( $\pi_{DE}^{*g}$ ) sampled from empirical setting II. The numbers besides each box indicate the mean value over 100 simulations. The horizontal black dashed line in each plot outlines the 5% nominal level.



## Actual FDR and Power comparison at nominal level 10% under Setting SE2

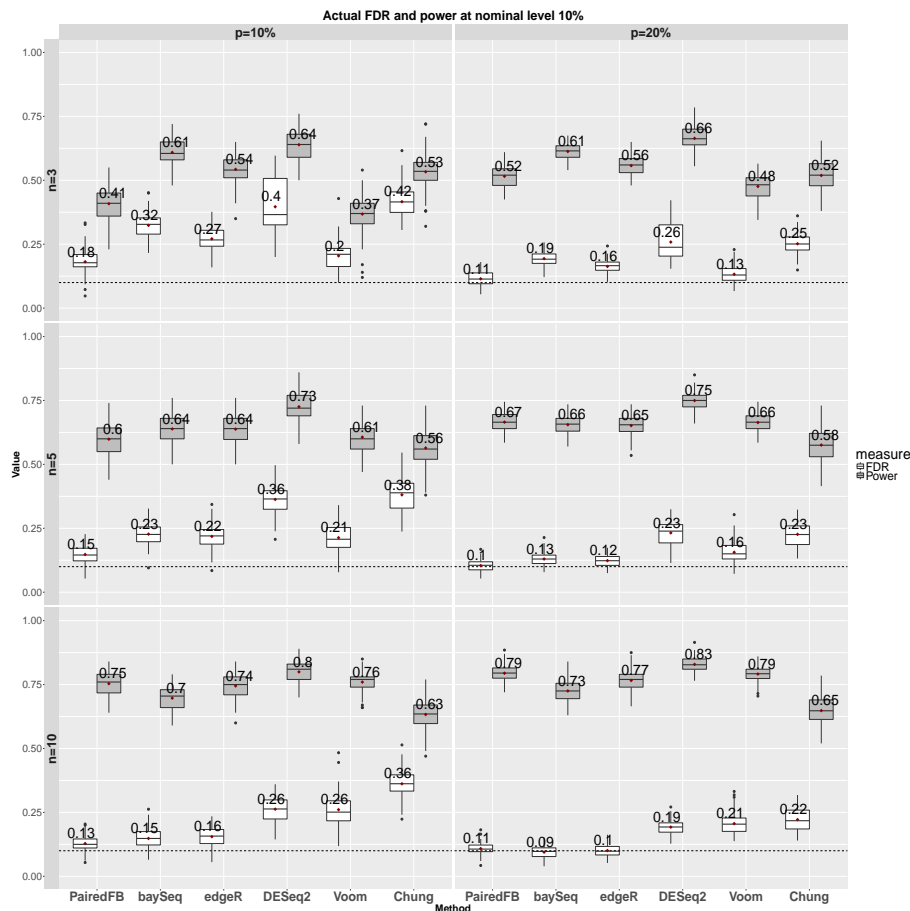

Figure S32: The box plots of the actual false discovery proportion and true detection rate over 100 simulations at nominal level 5% comparing all methods when data is generated from Poisson-minimax mixture. Subplots in each row represent results for different sample sizes ( $n = 3, 5, 10$ ) and column for different DE proportions ( $p = 5\%, 20\%$ ). Parameters of the minimax distribution match the  $\phi^g$  and  $\pi^{*g}$  of DE genes ( $\pi_{DE}^{*g}$ ) sampled from empirical setting I. The numbers besides each box indicate the mean value over 100 simulations. The horizontal black dashed line in each plot outlines the 10% nominal level.

## 2.5 Results when running longer MCMC for Chung's methods

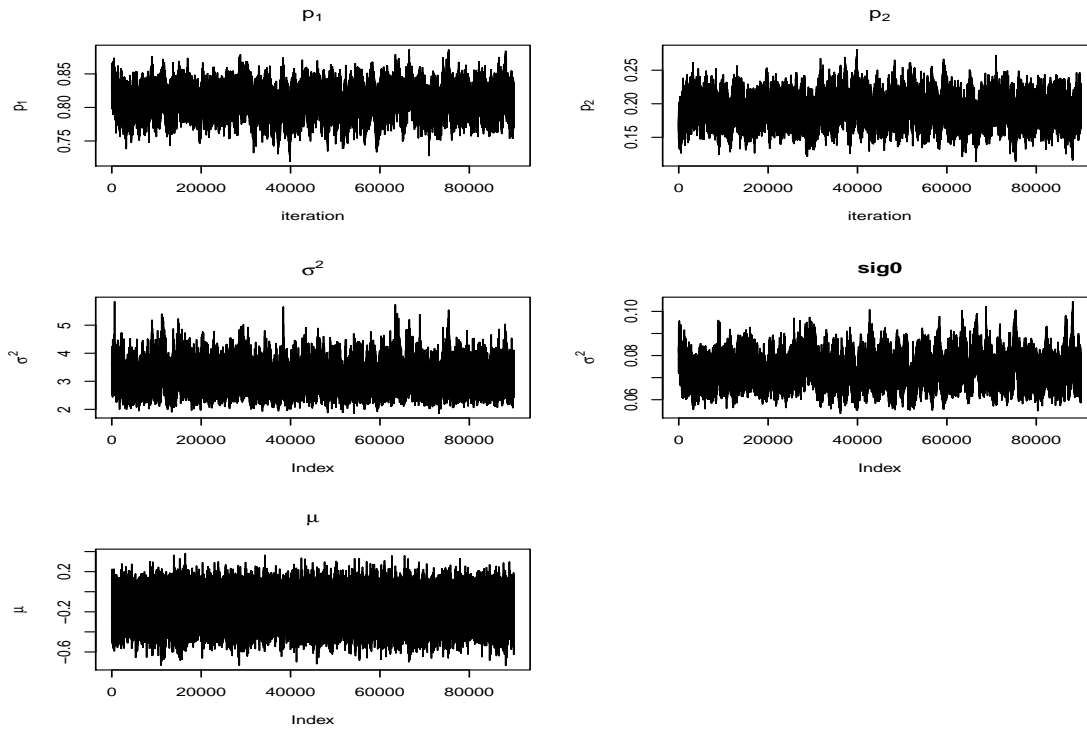

Figure S33: Trace plots (90000 iterations after discarding 10000 burn-in samples) for hyperparameters  $(1 - p), p, \sigma^2, \sigma_0^2, \mu$  (from left to right and top to bottom) in the full Bayesian model of Chung *et al.* (2013) from one simulation under Setting SE1 when  $p = 20\%$  and  $n = 10$ .

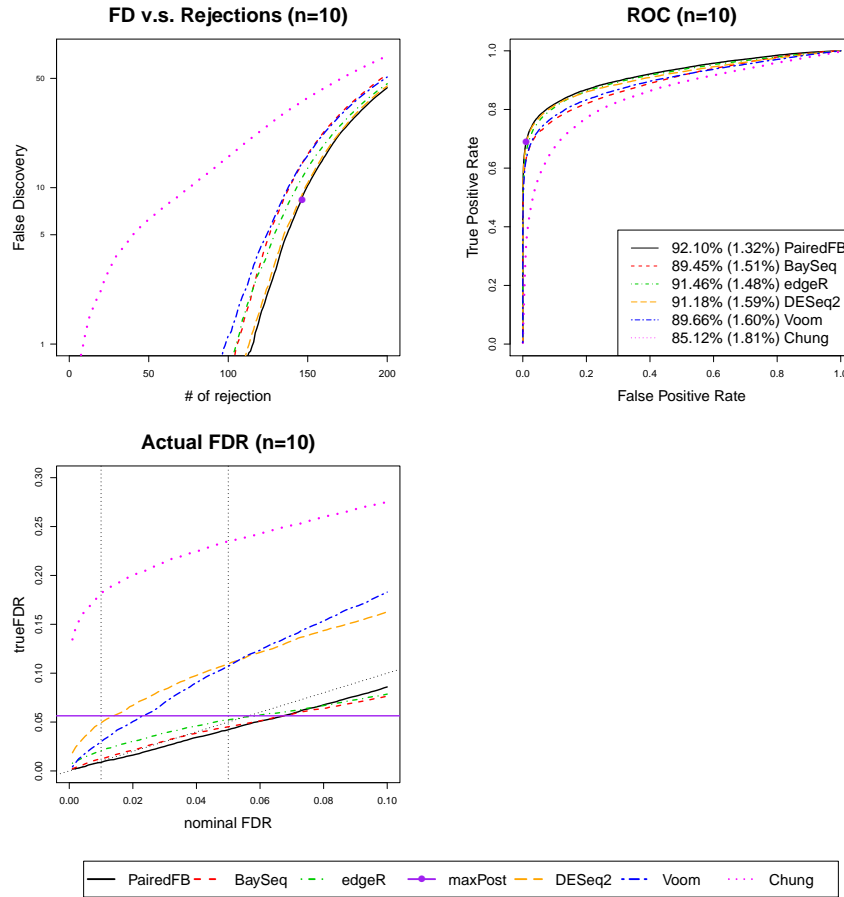

Figure S34: False discovery plots, ROC curves and the actual FDR curves comparing all methods under Setting SE1 when  $n = 10$  and DE proportion  $p = 20\%$  when running longer MCMC for Chung's method. Here we increase the iterations of MCMC for Chung's full Bayesian model to 100,000 and the burn-in samples are 10,000.

## 2.6 Real Data Analysis

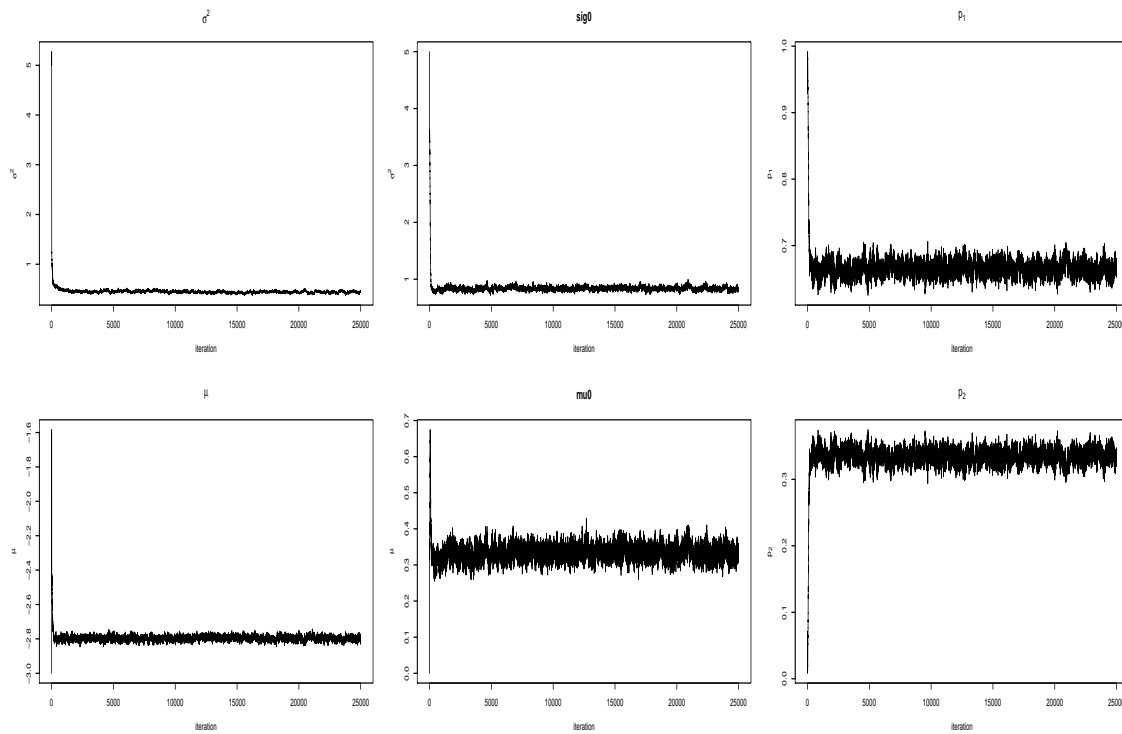

Figure S35: Trace plots for hyper-parameters  $\sigma^2$ ,  $\mu$ ,  $\sigma_0^2$ ,  $\mu_0$ ,  $(1-p)$ ,  $p$  (from top to bottom and left to right) in the real data analysis.

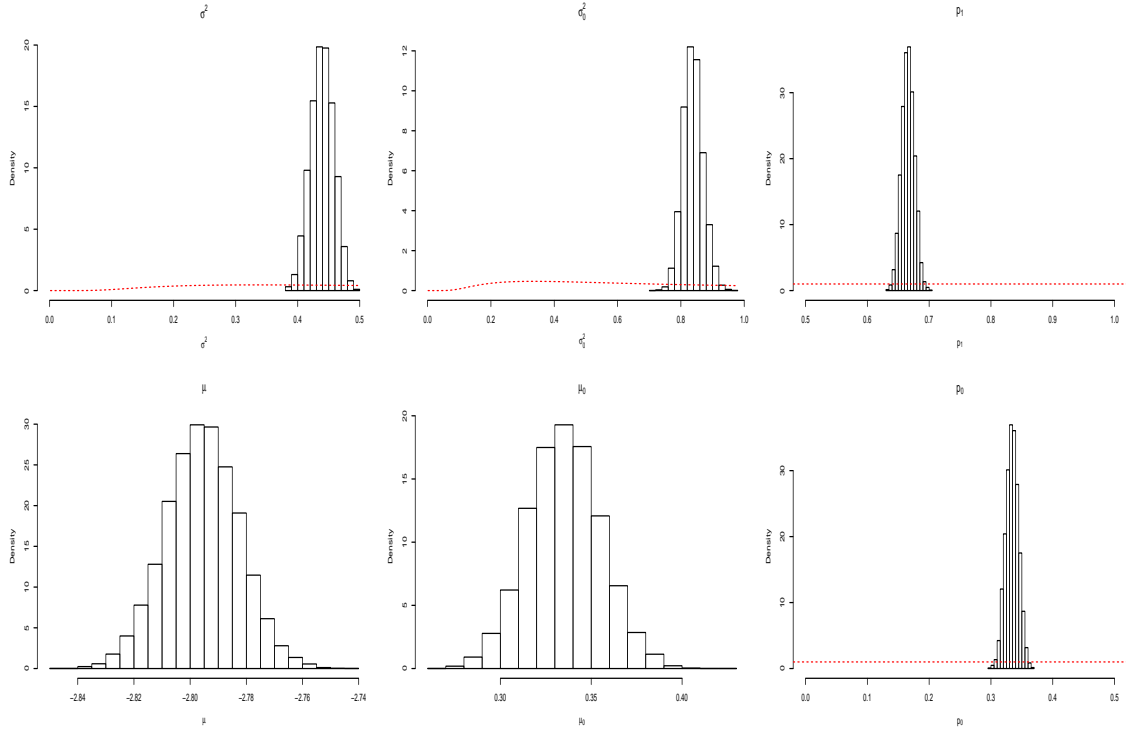

Figure S36: Histograms of posterior samples of hyper-parameters  $\sigma^2, \mu, \sigma_0^2, \mu_0, p_1, p_0$  (from top to bottom and left to right) in the real data analysis. The red dashed line indicates the proper prior density.

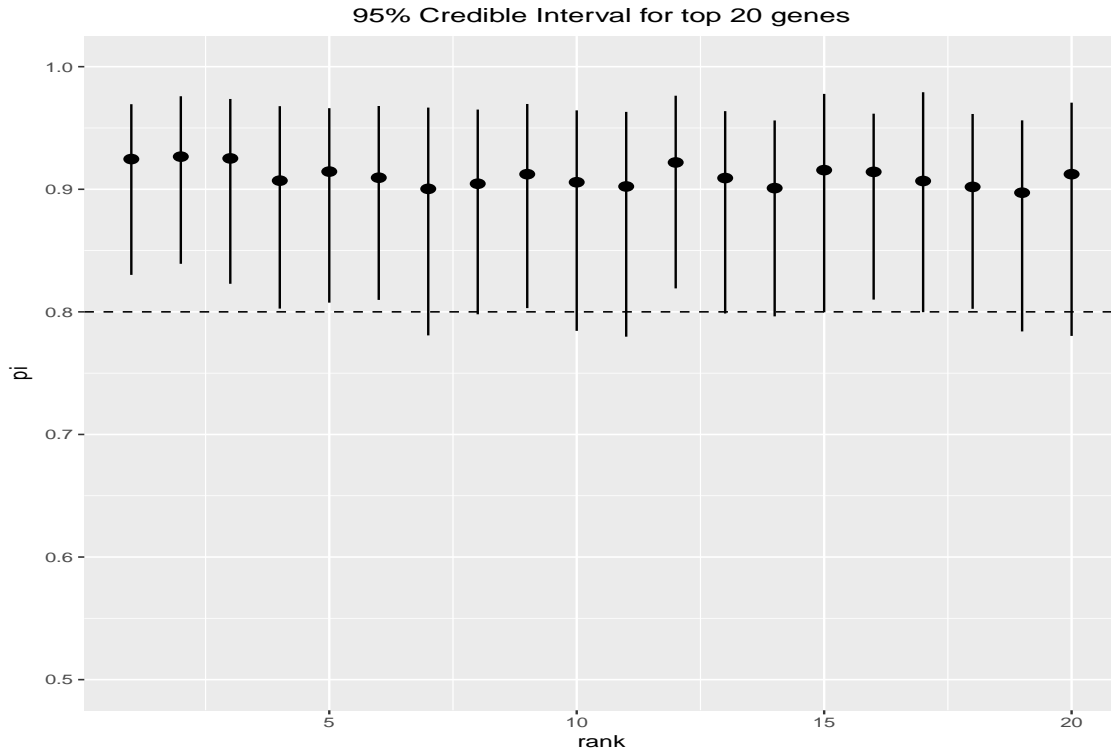

Figure S37: The 95% credible interval of posterior samples of  $\pi^g$  for the top 20 ranked genes in Table S1 identified by PairedFB method. The dashed line indicates  $FC=4$ .

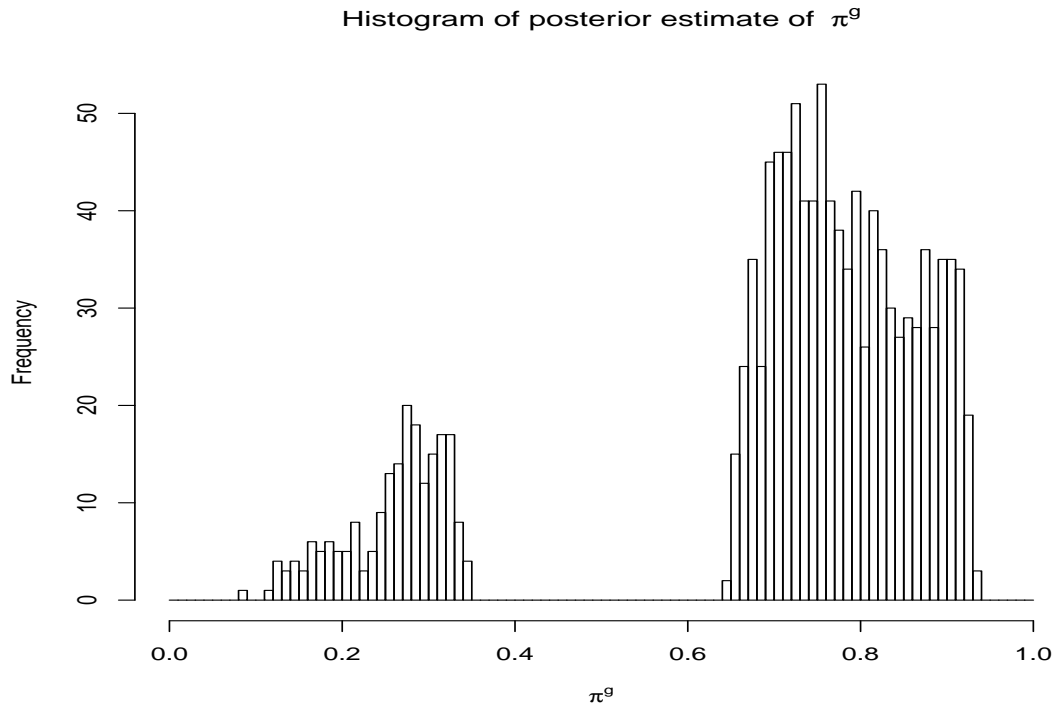

Figure S38: The histogram of posterior mean of  $\pi^g$  for the 1190 DEGs identified by PairedFB when FDR is controlled at 5%.

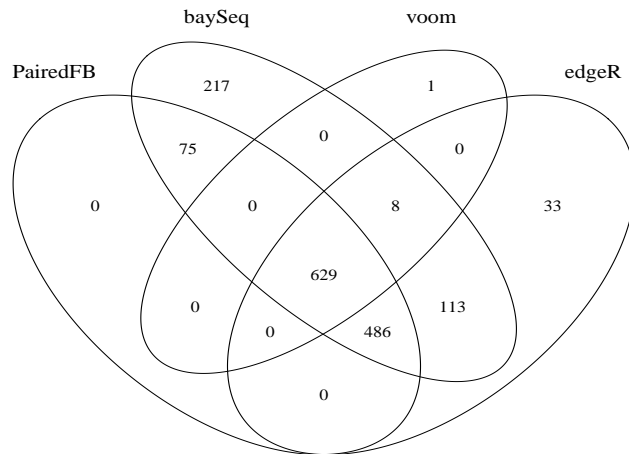

Figure S39: Venn Diagram of DE genes detected by different methods for the carcinoma data by Tuch *et al.* (2010) at nominal level 5%.



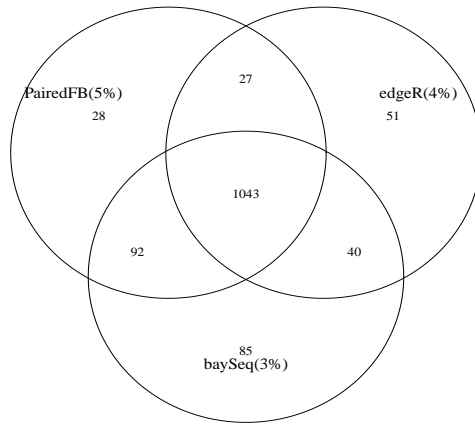

Figure S40: Venn Diagram of DE genes detected by different methods for the carcinoma data by Tuch *et al.* (2010) at different nominal levels. The nominal level is controlled at 5% for PairedFB method and 4% for the edgeR and 3% for paired baySeq method.

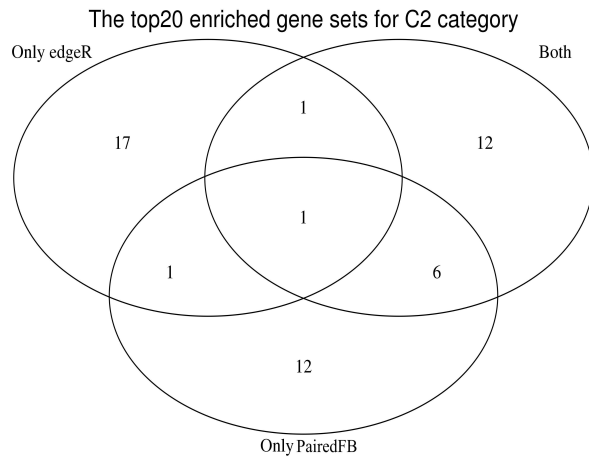

(a) Compare to edgeR

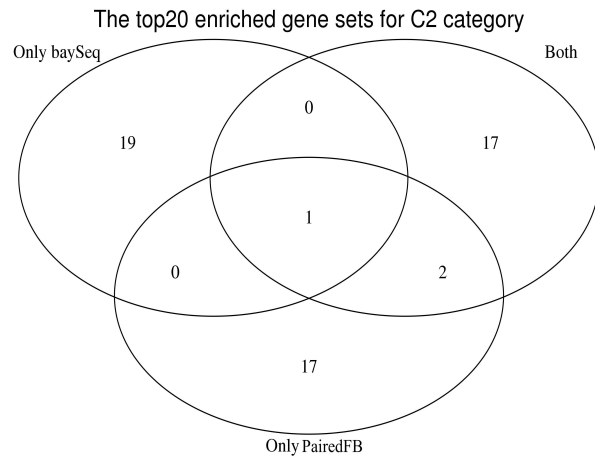

(b) Compare to baySeq

Figure S41: Venn diagram of top 20 enriched gene sets for C2 category of DE genes detected by both PairedFB and edgeR (or baySeq), PairedFB only and edgeR (or baySeq) only at comparable nominal levels: 5% for PairedFB, 4% for edgeR and 3% for paired baySeq.

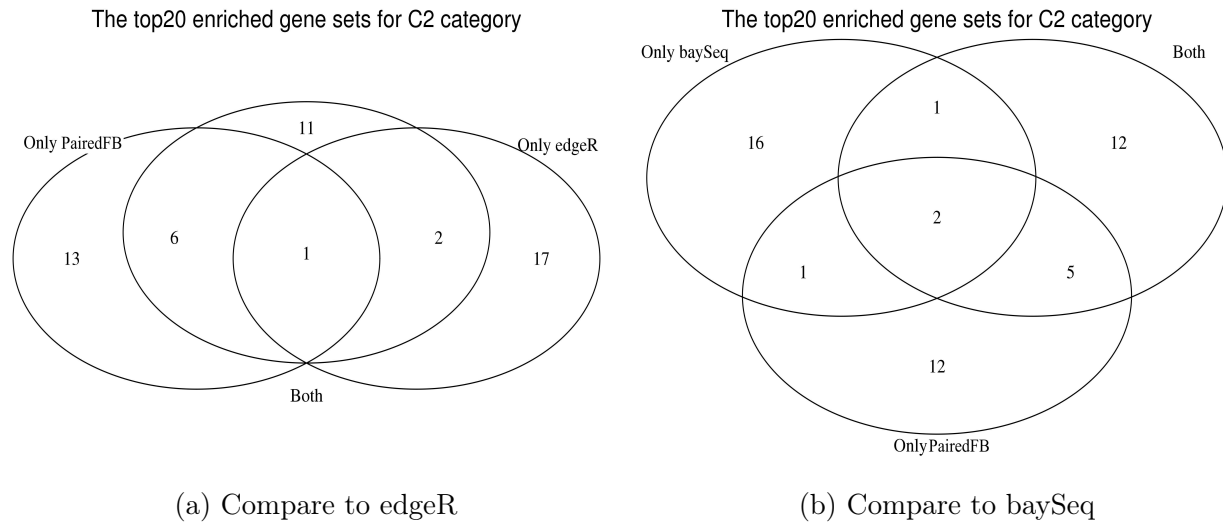

Figure S42: Venn diagram of top 20 enriched gene sets for C2 category of DE genes detected by both PairedFB and edgeR (or baySeq), PairedFB only and edgeR (or baySeq) only in the top 500 DEGs list.

### 3 Tables

| Gene      | X8N  | X8T | X33N | X33T | X51N | X51T | log2FC | pp    | pp_2FC | pp_4FC |
|-----------|------|-----|------|------|------|------|--------|-------|--------|--------|
| TMPRSS11B | 286  | 0   | 744  | 24   | 153  | 1    | 6.29   | 1.000 | 1.000  | 0.988  |
| MAL       | 297  | 0   | 376  | 20   | 79   | 0    | 5.87   | 1.000 | 1.000  | 0.998  |
| CEACAM7   | 21   | 0   | 10   | 1    | 14   | 0    | 5.00   | 1.000 | 1.000  | 0.995  |
| LDB3      | 165  | 0   | 124  | 2    | 124  | 13   | 4.71   | 1.000 | 0.999  | 0.980  |
| ACTA1     | 368  | 1   | 305  | 2    | 619  | 59   | 4.92   | 1.000 | 1.000  | 0.978  |
| DES       | 1057 | 12  | 639  | 10   | 3791 | 371  | 4.64   | 1.000 | 1.000  | 0.985  |
| KLHL40    | 12   | 0   | 14   | 0    | 24   | 4    | 4.32   | 1.000 | 1.000  | 0.967  |
| HSPB7     | 67   | 0   | 55   | 0    | 130  | 22   | 4.30   | 1.000 | 1.000  | 0.962  |
| MYOZ3     | 28   | 0   | 21   | 0    | 25   | 5    | 4.09   | 1.000 | 1.000  | 0.979  |
| TMOD1     | 24   | 0   | 24   | 0    | 79   | 12   | 4.44   | 1.000 | 0.999  | 0.969  |
| ENO3      | 120  | 1   | 123  | 5    | 220  | 12   | 4.87   | 1.000 | 0.999  | 0.952  |
| CASQ1     | 57   | 0   | 82   | 0    | 38   | 5    | 4.63   | 1.000 | 1.000  | 0.996  |
| PTGFR     | 50   | 1   | 27   | 1    | 79   | 3    | 4.98   | 1.000 | 1.000  | 0.973  |
| LAMB4     | 54   | 1   | 124  | 10   | 13   | 1    | 4.11   | 1.000 | 1.000  | 0.964  |
| TRIM54    | 24   | 0   | 12   | 0    | 43   | 5    | 4.80   | 1.000 | 1.000  | 0.982  |
| PYGM      | 154  | 3   | 121  | 1    | 99   | 6    | 5.11   | 1.000 | 1.000  | 0.978  |
| ASB5      | 47   | 0   | 47   | 1    | 194  | 21   | 4.60   | 1.000 | 1.000  | 0.976  |
| GPX3      | 194  | 2   | 141  | 12   | 226  | 14   | 4.28   | 1.000 | 0.999  | 0.974  |
| SRL       | 91   | 1   | 62   | 3    | 95   | 11   | 4.14   | 1.000 | 0.997  | 0.961  |
| SMYD1     | 54   | 0   | 49   | 1    | 64   | 8    | 4.45   | 1.000 | 1.000  | 0.970  |

Table S1: The raw count data (showing counts per million) and other statistics of the top 20 DE genes identified by the PairedFB from the analysis of the carcinoma data by Tuch *et al.* (2010). The last column gives the rank of each gene based on the PairedFB method and the pp column gives the posterior probability of being DE. pp\_2FC and pp\_4FC correspond to the posterior probability of each gene having mean fold change exceeding 2 and 4 respectively.

| Gene         | X8N   | X8T  | X33N  | X33T | X51N | X51T  | log2FC | pp    | pp_2FC | pp_4FC | rank |
|--------------|-------|------|-------|------|------|-------|--------|-------|--------|--------|------|
| <b>MAL</b>   | 297   | 0    | 376   | 20   | 79   | 0     | 5.87   | 1.000 | 1.000  | 0.998  | 2    |
| <b>SPP1</b>  | 2     | 48   | 3     | 634  | 7    | 94    | -4.66  | 0.999 | 0.983  | 0.917  | 74   |
| <b>MMP12</b> | 1     | 35   | 3     | 79   | 1    | 6     | -3.75  | 0.999 | 0.988  | 0.875  | 142  |
| <b>KRT13</b> | 43428 | 290  | 34287 | 7836 | 9622 | 102   | 3.78   | 0.999 | 0.995  | 0.943  | 143  |
| <b>TGM3</b>  | 2849  | 190  | 2213  | 331  | 580  | 4     | 3.81   | 0.999 | 0.991  | 0.921  | 152  |
| <b>LAMC2</b> | 35    | 567  | 36    | 336  | 63   | 1110  | -3.74  | 0.999 | 0.986  | 0.908  | 163  |
| <b>KRT4</b>  | 8432  | 45   | 9445  | 1526 | 2153 | 2     | 4.30   | 0.999 | 0.996  | 0.936  | 170  |
| <b>EMP1</b>  | 1366  | 291  | 2111  | 142  | 767  | 126   | 2.79   | 0.999 | 0.991  | 0.796  | 171  |
| <b>ECM1</b>  | 331   | 28   | 694   | 104  | 114  | 36    | 2.51   | 0.996 | 0.980  | 0.693  | 261  |
| <b>MMP1</b>  | 5     | 158  | 6     | 116  | 395  | 1164  | -3.00  | 0.951 | 0.964  | 0.676  | 706  |
| <b>MMP10</b> | 1     | 10   | 5     | 6    | 13   | 342   | -2.05  | 0.950 | 0.861  | 0.474  | 722  |
| <b>PLAU</b>  | 27    | 81   | 27    | 96   | 88   | 250   | -1.64  | 0.918 | 0.768  | 0.047  | 879  |
| <b>KRT17</b> | 241   | 2202 | 267   | 702  | 547  | 1293  | -1.79  | 0.887 | 0.781  | 0.173  | 994  |
| <b>POSTN</b> | 20    | 112  | 51    | 96   | 150  | 453   | -1.59  | 0.876 | 0.713  | 0.073  | 1025 |
| <b>ITGA6</b> | 262   | 940  | 192   | 330  | 206  | 1545  | -1.71  | 0.874 | 0.737  | 0.116  | 1036 |
| MMP3         | 5     | 28   | 4     | 40   | 73   | 85    | -1.70  | 0.797 | 0.618  | 0.130  | 1280 |
| CXCL8        | 3     | 54   | 9     | 85   | 51   | 43    | -1.74  | 0.718 | 0.605  | 0.158  | 1505 |
| IFI6         | 49    | 72   | 17    | 29   | 15   | 108   | -1.23  | 0.641 | 0.355  | 0.017  | 1755 |
| TNC          | 239   | 457  | 147   | 934  | 1284 | 1317  | -1.06  | 0.484 | 0.184  | 0.004  | 2373 |
| FN1          | 211   | 542  | 235   | 1234 | 1937 | 1593  | -1.02  | 0.429 | 0.157  | 0.004  | 2657 |
| COL1A2       | 351   | 2681 | 825   | 978  | 5845 | 2317  | -0.41  | 0.203 | 0.029  | 0.001  | 5232 |
| COL5A2       | 144   | 707  | 200   | 265  | 1635 | 847   | -0.47  | 0.202 | 0.027  | 0.000  | 5261 |
| COL4A1       | 206   | 1026 | 354   | 350  | 1941 | 586   | -0.12  | 0.164 | 0.013  | 0.000  | 6376 |
| SPARC        | 245   | 445  | 286   | 222  | 1483 | 746   | 0.16   | 0.140 | 0.006  | 0.000  | 7575 |
| KRT5         | 10445 | 7358 | 9335  | 5948 | 4091 | 10548 | -0.04  | 0.136 | 0.005  | 0.000  | 7834 |

Table S2: The raw count data (showing counts per million) and other statistics based on the PairedFB for the important head and neck squamous cell carcinoma 25 genes as identified by Yu *et al.* (2008). The bolded 15 genes are detected by PairedFB at 5% nominal FDR level. The last column gives the rank of each gene based on the PairedFB method and the pp column gives the posterior probability of being DE. pp\_2FC and pp\_4FC correspond to the posterior probability of each gene having mean fold change exceeding 2 and 4 respectively.

| Gene          | X8N | X8T  | X33N | X33T | X51N | X51T | log2FC | pp    | pp_2FC | pp_4FC | rank |
|---------------|-----|------|------|------|------|------|--------|-------|--------|--------|------|
| <b>CASQ1</b>  | 57  | 0    | 82   | 0    | 38   | 5    | 4.63   | 1.000 | 1.000  | 0.996  | 12   |
| <b>INHBA</b>  | 3   | 80   | 4    | 77   | 33   | 119  | -3.16  | 0.985 | 0.965  | 0.794  | 456  |
| <b>WIF1</b>   | 9   | 5    | 20   | 1    | 3    | 0    | 2.68   | 0.984 | 0.967  | 0.737  | 471  |
| <b>HMGA2</b>  | 1   | 181  | 2    | 30   | 4    | 8    | -2.69  | 0.981 | 0.928  | 0.635  | 511  |
| <b>SHANK2</b> | 3   | 151  | 5    | 17   | 3    | 15   | -2.65  | 0.955 | 0.886  | 0.580  | 689  |
| <b>MMP1</b>   | 5   | 158  | 6    | 116  | 395  | 1164 | -3.00  | 0.951 | 0.964  | 0.676  | 706  |
| CCND1         | 152 | 1931 | 191  | 138  | 72   | 140  | -1.01  | 0.467 | 0.254  | 0.021  | 2446 |
| CTTN          | 166 | 2316 | 152  | 113  | 150  | 166  | -0.76  | 0.354 | 0.128  | 0.005  | 3212 |
| CDKN2B        | 61  | 0    | 79   | 74   | 30   | 241  | 0.24   | 0.317 | 0.157  | 0.027  | 3568 |

Table S3: The raw count data (showing counts per million) and other statistics based on the PairedFB for the 9 genes of interest identified by Tuch *et al.* (2010). The bolded 6 genes are identified by PairedFB at 5% nominal FDR level. The last column gives the rank of each gene based on the PairedFB method and the pp column gives the posterior probability of being DE. pp\_2FC and pp\_4FC correspond to the posterior probability of each gene having mean fold change exceeding 2 and 4 respectively.

| GOID       | Term                                           | Ontology | P-Value  | FDR      |
|------------|------------------------------------------------|----------|----------|----------|
| GO:0003012 | muscle system process                          | BP       | 1.53E-33 | 2.87E-29 |
| GO:0006936 | muscle contraction                             | BP       | 1.06E-32 | 9.89E-29 |
| GO:0043292 | contractile fiber                              | CC       | 2.63E-31 | 1.64E-27 |
| GO:0044449 | contractile fiber part                         | CC       | 6.84E-31 | 3.20E-27 |
| GO:0030016 | myofibril                                      | CC       | 1.79E-30 | 6.70E-27 |
| GO:0003008 | system process                                 | BP       | 3.13E-30 | 9.75E-27 |
| GO:0030017 | sarcomere                                      | CC       | 1.23E-29 | 3.28E-26 |
| GO:0032501 | multicellular organismal process               | BP       | 2.04E-28 | 4.76E-25 |
| GO:0071944 | cell periphery                                 | CC       | 1.38E-26 | 2.87E-23 |
| GO:0005886 | plasma membrane                                | CC       | 1.54E-24 | 2.89E-21 |
| GO:0005578 | proteinaceous extracellular matrix             | CC       | 1.99E-24 | 3.38E-21 |
| GO:0009888 | tissue development                             | BP       | 7.85E-24 | 1.22E-20 |
| GO:0005576 | extracellular region                           | CC       | 1.33E-22 | 1.91E-19 |
| GO:0044459 | plasma membrane part                           | CC       | 4.35E-22 | 5.81E-19 |
| GO:0044707 | single-multicellular organism process          | BP       | 4.39E-21 | 5.47E-18 |
| GO:0051239 | regulation of multicellular organismal process | BP       | 1.78E-20 | 2.08E-17 |
| GO:0005615 | extracellular space                            | CC       | 2.09E-20 | 2.30E-17 |
| GO:0031012 | extracellular matrix                           | CC       | 3.03E-20 | 3.15E-17 |
| GO:0030049 | muscle filament sliding                        | BP       | 6.97E-20 | 6.51E-17 |
| GO:0033275 | actin-myosin filament sliding                  | BP       | 6.97E-20 | 6.51E-17 |
| GO:0003013 | circulatory system process                     | BP       | 1.84E-19 | 1.64E-16 |
| GO:0008015 | blood circulation                              | BP       | 2.75E-19 | 2.33E-16 |
| GO:0044057 | regulation of system process                   | BP       | 1.13E-18 | 9.09E-16 |
| GO:0055001 | muscle cell development                        | BP       | 1.17E-18 | 9.09E-16 |
| GO:0048856 | anatomical structure development               | BP       | 2.93E-18 | 2.19E-15 |
| GO:0005887 | integral component of plasma membrane          | CC       | 6.05E-18 | 4.35E-15 |
| GO:0048731 | system development                             | BP       | 7.38E-18 | 5.11E-15 |
| GO:0031226 | intrinsic component of plasma membrane         | CC       | 8.71E-18 | 5.82E-15 |
| GO:0048513 | animal organ development                       | BP       | 1.97E-17 | 1.27E-14 |
| GO:0044421 | extracellular region part                      | CC       | 4.03E-17 | 2.51E-14 |
| GO:0061061 | muscle structure development                   | BP       | 5.05E-17 | 3.04E-14 |
| GO:0006928 | movement of cell or subcellular component      | BP       | 5.37E-17 | 3.14E-14 |
| GO:0030029 | actin filament-based process                   | BP       | 7.68E-17 | 4.35E-14 |
| GO:0030154 | cell differentiation                           | BP       | 8.80E-17 | 4.84E-14 |
| GO:0031674 | I band                                         | CC       | 1.48E-16 | 7.91E-14 |
| GO:0055002 | striated muscle cell development               | BP       | 2.44E-16 | 1.27E-13 |
| GO:0009653 | anatomical structure morphogenesis             | BP       | 3.45E-16 | 1.74E-13 |
| GO:0005539 | glycosaminoglycan binding                      | MF       | 3.62E-16 | 1.78E-13 |
| GO:0007275 | multicellular organism development             | BP       | 1.04E-15 | 5.01E-13 |
| GO:0040011 | locomotion                                     | BP       | 1.94E-15 | 8.88E-13 |
| GO:0032502 | developmental process                          | BP       | 1.95E-15 | 8.88E-13 |
| GO:0016477 | cell migration                                 | BP       | 2.10E-15 | 9.32E-13 |
| GO:0070252 | actin-mediated cell contraction                | BP       | 2.61E-15 | 1.13E-12 |
| GO:0048870 | cell motility                                  | BP       | 3.05E-15 | 1.27E-12 |
| GO:0051674 | localization of cell                           | BP       | 3.05E-15 | 1.27E-12 |
| GO:0090257 | regulation of muscle system process            | BP       | 4.28E-15 | 1.74E-12 |
| GO:0004872 | receptor activity                              | MF       | 4.89E-15 | 1.90E-12 |
| GO:0060089 | molecular transducer activity                  | MF       | 4.89E-15 | 1.90E-12 |
| GO:0030198 | extracellular matrix organization              | BP       | 7.37E-15 | 2.75E-12 |
| GO:0043062 | extracellular structure organization           | BP       | 7.37E-15 | 2.75E-12 |

Table S4: Top 50 GO terms of DE results from PairedFB at nominal level 5% in the analysis of the carcinoma data by Tuch *et al.* (2010). 63

(a) Compared with edgeR

|       | Overlap                                      | Only edgeR | Only PairedFB                                    |
|-------|----------------------------------------------|------------|--------------------------------------------------|
|       | Gene Set Name                                | p-Value    | Gene Set Name                                    |
| Top1  | <b>SMID BREAST CANCER NORMAL LIKE UP</b>     | 1.68E-87   | <b>SMID BREAST CANCER BASAL UP</b>               |
| Top2  | <b>SWEET LUNG CANCER KRAS DN</b>             | 2.25E-86   | ALFANO MYC TARGETS                               |
| Top3  | LEE BMP2 TARGETS UP                          | 5.96E-86   | KAN RESPONSE TO ARSENIC TRIOXIDE                 |
| Top4  | BOQUEST STEM CELL CULTURED VS FRESH UP       | 1.67E-81   | MEISSNER BRAIN HCP WITH H3K4ME3 AND H3K27ME3     |
| Top5  | MEISSNER BRAIN HCP WITH H3K4ME3 AND H3K27ME3 | 2.01E-73   | <b>VECCHI GASTRIC CANCER EARLY UP</b>            |
| Top6  | CUI TCF21 TARGETS 2 DN                       | 9.59E-68   | <b>SMID BREAST CANCER LUMINAL B DN</b>           |
| Top7  | DODD NASOPHARYNGEAL CARCINOMA UP             | 3.33E-67   | DOUGLAS BM1 TARGETS UP                           |
| Top8  | <b>LIU PROSTATE CANCER DN</b>                | 3.91E-64   | BLUM RESPONSE TO SALIRASIB DN                    |
| Top9  | <b>RICKMAN HEAD AND NECK CANCER F</b>        | 1.13E-62   | KINSEY TARGETS OF EWSR1 FLII FUSION UP           |
| Top10 | WONG ADULT TISSUE STEM_MODULE                | 1.14E-61   | PEREZ TP53 TARGETS                               |
| Top11 | NABA MATRISOME                               | 9.55E-61   | GRAESSMANN APOPTOSIS BY DOXORUBICIN DN           |
| Top12 | <b>SMID BREAST CANCER LUMINAL B DN</b>       | 1.10E-57   | DUTERRE ESTRADIOL RESPONSE 24HR UP               |
| Top13 | LIM MAMMARY STEM CELL UP                     | 4.50E-57   | <b>FARMER BREAST CANCER BASAL VS LUMINAL</b>     |
| Top14 | CHICAS RB1 TARGETS CONFLUENT                 | 5.11E-56   | <b>CHARAFE BREAST CANCER LUMINAL VS BASAL DN</b> |
| Top15 | PICCALUGA ANGIOIMMUNOBLASTIC LYMPHOMA UP     | 1.19E-54   | MARTINEZ TP53 TARGETS DN                         |
| Top16 | BOQUEST STEM CELL UP                         | 1.64E-54   | ONDER CDH1 TARGETS 2 DN                          |
| Top17 | <b>LINDGREN BLADDER CANCER CLUSTER 2B</b>    | 5.84E-54   | LI WILMS TUMOR VS FETAL KIDNEY 1 DN              |
| Top18 | ONDER CDH1 TARGETS 2 UP                      | 1.41E-52   | MASSARWEH TAMOXIFEN RESISTANCE DN                |
| Top19 | SCHUETZ BREAST CANCER DUCTAL INVASIVE UP     | 1.99E-52   | BUYTART PHOTOYNAMIC THERAPY STRESS DN            |
| Top20 | <b>SMID BREAST CANCER BASAL DN</b>           | 6.68E-51   | ONKEN UVEAL MELANOMA DN                          |

(b) Compared with baySeq

|       | Overlap                                      | Only baySeq | Only PairedFB                                        |
|-------|----------------------------------------------|-------------|------------------------------------------------------|
|       | Gene Set Name                                | p-Value     | Gene Set Name                                        |
| Top1  | <b>SMID BREAST CANCER NORMAL LIKE UP</b>     | 5.23E-88    | BERENJENO TRANSFORMED BY RHOA UP                     |
| Top2  | LEE BMP2 TARGETS UP                          | 1.47E-86    | KINSEY TARGETS OF EWSR1 FLII FUSION UP               |
| Top3  | <b>SWEET LUNG CANCER KRAS DN</b>             | 1.83E-83    | PUJANA BRCA1 PCC NETWORK                             |
| Top4  | BOQUEST STEM CELL CULTURED VS FRESH UP       | 2.63E-82    | BLALOCK ALZHEIMERS DISEASE DN                        |
| Top5  | MEISSNER BRAIN HCP WITH H3K4ME3 AND H3K27ME3 | 4.16E-75    | HELLER HDAC TARGETS SILENCED BY METHYLATION UP       |
| Top6  | <b>DODD NASOPHARYNGEAL CARCINOMA UP</b>      | 2.46E-70    | REACTOME CELL CYCLE MITOTIC                          |
| Top7  | CUI TCF21 TARGETS 2 DN                       | 2.11E-67    | KAN RESPONSE TO ARSENIC TRIOXIDE                     |
| Top8  | <b>LIU PROSTATE CANCER DN</b>                | 4.96E-67    | REACTOME CELL CYCLE                                  |
| Top9  | WONG ADULT TISSUE STEM_MODULE                | 1.93E-66    | NUYTEN EZH2 TARGETS DN                               |
| Top10 | PICCALUGA ANGIOIMMUNOBLASTIC LYMPHOMA UP     | 2.72E-62    | FEVR CTNNB1 TARGETS DN                               |
| Top11 | <b>RICKMAN HEAD AND NECK CANCER F</b>        | 1.57E-61    | MEISSNER BRAIN HCP WITH H3K4ME3 AND H3K27ME3         |
| Top12 | NABA MATRISOME                               | 5.96E-61    | GOBERT OLIGODENDROCYTE DIFFERENTIATION DN            |
| Top13 | BOQUEST STEM CELL UP                         | 1.28E-57    | BASAKI YBX1 TARGETS UP                               |
| Top14 | LIM MAMMARY STEM CELL UP                     | 7.79E-57    | <b>PATIL LIVER CANCER</b>                            |
| Top15 | <b>SMID BREAST CANCER LUMINAL B DN</b>       | 8.68E-57    | DUTERRE ESTRADIOL RESPONSE 24HR UP                   |
| Top16 | <b>LINDGREN BLADDER CANCER CLUSTER 2B</b>    | 3.78E-55    | PENG RAPAMYCIN RESPONSE DN                           |
| Top17 | CHICAS RB1 TARGETS CONFLUENT                 | 1.28E-54    | <b>SMID BREAST CANCER BASAL UP</b>                   |
| Top18 | ONDER CDH1 TARGETS 2 UP                      | 1.76E-54    | PUJANA CHEK2 PCC NETWORK                             |
| Top19 | SCHUETZ BREAST CANCER DUCTAL INVASIVE UP     | 8.27E-54    | KOBAYASHI EGFR SIGNALING 24HR DN                     |
| Top20 | <b>SMID BREAST CANCER BASAL DN</b>           | 3.83E-51    | <b>CHIANG LIVER CANCER SUBCLASS PROLIFERATION UP</b> |

Table S5: Top 20 enriched gene sets of DE genes based on the overlapping genes of both PairedFB and edgeR (or baySeq), edgeR (or baySeq) only and PairedFB only when the nominal level is controlled at 5% for PairedFB method and 3% for edgeR (or baySeq). Bolded gene sets are cancer related or HNSCC related. Underline is used to indicate the common enriched gene sets between results from DEG list of uniquely and commonly identified



| Top     | PairedFB & edgeR | PairedFB & baySeq | edgeR & baySeq |
|---------|------------------|-------------------|----------------|
| Top 100 | 50               | 57                | 61             |
| Top 200 | 141              | 150               | 141            |
| Top 500 | 434              | 434               | 410            |

Table S6: Number of overlapping DE genes in different top ranked gene lists between any two methods from PairedFB, edgeR and baySeq for the carcinoma data by Tuch *et al.* (2010).

(a) Compared with edgeR

| Overlap                                                     |          | Only edgeR                                      |          | Only PairedFB                                              |          |
|-------------------------------------------------------------|----------|-------------------------------------------------|----------|------------------------------------------------------------|----------|
| Gene Set Name                                               | p-Value  | Gene Set Name                                   | p-Value  | Gene Set Name                                              | p-Value  |
| <b>RICKMAN HEAD AND NECK CANCER F</b>                       | 3.68E-75 | NABA MATRISOME                                  | 2.23E-09 | <b>DODD NASOPHARYNGEAL CARCINOMA UP</b>                    | 5.83E-13 |
| <b>SMID BREAST CANCER NORMAL LIKE UP</b>                    | 5.64E-51 | BERENJENO TRANSFORMED BY RHOA DN                | 5.50E-09 | <b>SMID BREAST CANCER NORMAL LIKE UP</b>                   | 8.44E-11 |
| <b>SWEET LUNG CANCER KRAS DN</b>                            | 7.72E-51 | PID SYNDECAN 1 PATHWAY                          | 6.86E-09 | <b>WEST ADRENOCORTICAL TUMOR DN</b>                        | 3.59E-10 |
| <b>KUNINGER IGFI VS PDGFB TARGETS UP</b>                    | 2.61E-45 | BOQUEST STEM CELL CULTURED VS FRESH UP          | 1.06E-08 | <b>BOQUEST STEM CELL DN</b>                                | 9.50E-10 |
| <b>FRESH UP</b>                                             | 2.30E-41 | MARTINEZ RBI TARGETS UP                         | 4.28E-08 | <b>DELYS THYROID CANCER DN</b>                             | 1.67E-09 |
| <b>BOQUEST STEM CELL UP</b>                                 | 5.20E-36 | HAN SATB1 TARGETS UP                            | 1.03E-07 | <b>RICKMAN TUMOR DIFFERENTIATED WELL VS MODERATELY UP</b>  | 1.25E-08 |
| <b>LEE BMP2 TARGETS UP</b>                                  | 4.34E-35 | VART KSHV INFECTION ANGIOGENIC MARKERS UP       | 1.49E-07 | <b>SWEET LUNG CANCER KRAS DN</b>                           | 1.29E-08 |
| <b>NABA MATRISOME</b>                                       | 7.96E-35 | BASAKI YBX1 TARGETS UP                          | 2.10E-07 | <b>CUI TCF21 TARGETS 2 DN</b>                              | 2.72E-08 |
| <b>DODD NASOPHARYNGEAL CARCINOMA UP</b>                     | 7.89E-34 | HAN SATB1 TARGETS DN                            | 2.42E-07 | <b>ZHENG BOUND BY FOXP3</b>                                | 3.64E-08 |
| <b>EARLY GASTRIC CANCER</b>                                 | 1.63E-33 | <b>DELYS THYROID CANCER UP</b>                  | 2.47E-07 | <b>ONDER CDH1 TARGETS 2 UP</b>                             | 9.02E-08 |
| <b>ACEVEDO FGFRI TARGETS IN PROSTATE CANCER MODEL DN</b>    | 5.10E-33 | KOINUMA TARGETS OF SMAD2 OR SMAD3               | 2.77E-07 | <b>EOQUEST STEM CELL UP</b>                                | 1.00E-07 |
| <b>EBAUER MYOGENIC TARGETS OF PAX3 FOXO1 FUSION</b>         | 1.16E-31 | PID INTEGRIN3 PATHWAY                           | 4.59E-07 | <b>NABA CORE MATRISOME</b>                                 | 1.47E-07 |
| <b>SABATES COLORECTAL ADENOMA DN</b>                        | 1.66E-31 | KIM WT1 TARGETS 12HR DN                         | 5.96E-07 | <b>WANG SMARCE1 TARGETS UP</b>                             | 1.66E-07 |
| <b>SMID BREAST CANCER LUMINAL B DN</b>                      | 7.19E-31 | BLALOCK ALZHEIMERS DISEASE UP                   | 7.18E-07 | <b>NABA MATRISOME</b>                                      | 2.33E-07 |
| <b>LIU PROSTATE CANCER DN</b>                               | 9.52E-31 | <b>SCHUETZ BREAST CANCER DUCTAL INVASIVE UP</b> | 7.56E-07 | <b>ACEVEDO LIVER CANCER WITH H3K27ME3 UP</b>               | 2.36E-07 |
| <b>SMID BREAST CANCER BASAL DN</b>                          | 1.74E-30 | NABA MATRISOME ASSOCIATED                       | 8.50E-07 | <b>MEISSNER BRAIN HCP WITH H3K4ME3 AND H3K37ME3</b>        | 3.42E-07 |
| <b>CROMER TUMORIGENESIS DN</b>                              | 1.63E-29 | <b>SMID BREAST CANCER LUMINAL B DN</b>          | 1.31E-06 | <b>BONOME OVARIAN CANCER SURVIVAL SUBOPTIMAL DEBULKING</b> | 7.12E-07 |
| <b>WONG ADULT TISSUE STEM MODULE DIFFERENTIATION MODULE</b> | 5.47E-28 | <b>KRIEG HYPOXIA NOT VIA KDM3A</b>              | 1.51E-06 | <b>MARKEY RB1 CHRONIC LOF DN</b>                           | 8.08E-07 |
| <b>EBAUER TARGETS OF PAX3 FOXO1 FUSION UP</b>               | 6.52E-28 | PID INTEGRIN5 PATHWAY                           | 1.57E-06 | <b>WONG ADULT TISSUE STEM MODULE</b>                       | 9.14E-07 |
|                                                             | 9.05E-28 |                                                 | 1.90E-06 | <b>LEE BMP2 TARGETS UP</b>                                 | 1.20E-06 |

(b) Compared with baySeq

| Overlap                                                                            |          | Only baySeq                                     |          | Only PairedFB                                               |          |
|------------------------------------------------------------------------------------|----------|-------------------------------------------------|----------|-------------------------------------------------------------|----------|
| Gene Set Name                                                                      | p-Value  | Gene Set Name                                   | p-Value  | Gene Set Name                                               | p-Value  |
| <b>RICKMAN HEAD AND NECK CANCER F</b>                                              | 3.68E-75 | <b>LEE BMP2 TARGETS UP</b>                      | 6.68E-10 | <b>DODD NASOPHARYNGEAL CARCINOMA UP</b>                     | 5.83E-13 |
| <b>SMID BREAST CANCER NORMAL LIKE UP</b>                                           | 1.62E-53 | CAIRO HEPATOBLASTOMA CLASSES DN                 | 2.33E-08 | <b>NABA MATRISOME</b>                                       | 1.89E-10 |
| <b>SWEET LUNG CANCER KRAS DN</b>                                                   | 3.93E-52 | BOQUEST STEM CELL DN                            | 2.83E-08 | <b>HAN SATB1 TARGETS UP</b>                                 | 2.70E-10 |
| <b>KUNINGER IGFI VS PDGFB TARGETS UP</b>                                           | 3.31E-47 | VART KSHV INFECTION ANGIOGENIC MARKERS UP       | 1.49E-07 | <b>WONG ADULT TISSUE STEM MODULE</b>                        | 4.61E-10 |
| <b>BOQUEST STEM CELL UP</b>                                                        | 2.04E-41 | GOZGIT ESRI TARGETS DN                          | 1.70E-07 | <b>BOQUEST STEM CELL CULTURED VS FRESH UP</b>               | 5.48E-10 |
| <b>BOQUEST STEM CELL CULTURED VS FRESH UP</b>                                      | 1.44E-36 | NABA MATRISOME                                  | 2.33E-07 | <b>LEE BMP2 TARGETS UP</b>                                  | 9.03E-09 |
| <b>DODD NASOPHARYNGEAL CARCINOMA UP</b>                                            | 7.89E-34 | PID INTEGRIN3 PATHWAY                           | 4.59E-07 | <b>GOZGIT ESRI TARGETS DN</b>                               | 1.46E-08 |
| <b>LEE BMP2 TARGETS UP</b>                                                         | 4.29E-33 | KINSEY TARGETS OF EWSR1 FLI1 FUSION DN          | 4.90E-07 | <b>SMID BREAST CANCER NORMAL LIKE UP</b>                    | 2.79E-08 |
| <b>SMID BREAST CANCER LUMINAL B DN</b>                                             | 5.70E-33 | <b>SCHUETZ BREAST CANCER DUCTAL INVASIVE UP</b> | 7.56E-07 | <b>BRUNS TVC RESPONSE VIA TP53</b>                          | 6.02E-08 |
| <b>DELYS THYROID CANCER DN</b>                                                     | 1.21E-32 | PEREZ TP53 TARGETS                              | 8.58E-07 | <b>FLUECHNER BIOPSY KIDNEY TRANSPLANT REJECTED VS OK DN</b> | 8.96E-08 |
| <b>NABA MATRISOME</b>                                                              | 4.30E-32 | DAVICIONI TARGETS OF PAX FOXO1 FUSIONS UP       | 1.89E-06 | <b>BLALOCK ALZHEIMERS DISEASE UP</b>                        | 1.02E-07 |
| <b>EBAUER MYOGENIC TARGETS OF PAX3 FOXO1 FUSION</b>                                | 1.16E-31 | KYNG DNA DAMAGE BY 4NQO OR UV                   | 2.17E-06 | <b>SWEET LUNG CANCER KRAS DN</b>                            | 2.15E-07 |
| <b>VECCHI GASTRIC CANCER</b>                                                       | 3.71E-31 | CUI TCF21 TARGETS 2 DN                          | 2.89E-06 | <b>RODRIGUES THYROID CARCINOMA POORLY DIFFERENTIATED DN</b> | 2.24E-07 |
| <b>EARLY DN FGFRI TARGETS IN ACEVEDO FGFRI TARGETS IN PROSTATE CANCER MODEL DN</b> | 1.44E-30 | GEORGES TARGETS OF MIR192 AND MIR193A           | 5.22E-06 | <b>MEISSNER BRAIN HCP WITH H3K4ME3 AND H3K27ME3</b>         | 3.42E-07 |
| <b>EBAUER TARGETS OF PAX3 FOXO1 FUSION UP</b>                                      | 2.07E-30 | LINDVALL IMMORTALIZED BY TERT DN                | 5.65E-06 | <b>LEE MYB TARGETS</b>                                      | 3.90E-07 |
| <b>SABATES COLORECTAL ADENOMA DN</b>                                               | 4.70E-29 | SCHAEFFER PROSTATE DEVELOPMENT 48HR UP          | 6.53E-06 | <b>LIU PROSTATE CANCER DN</b>                               | 4.59E-07 |
| <b>LIU PROSTATE CANCER DN</b>                                                      | 1.32E-28 | <b>SWEET LUNG CANCER KRAS DN</b>                | 6.88E-06 | <b>LIM MAMMARY STEM CELL UP</b>                             | 5.19E-07 |
| <b>PARACRINE DN</b>                                                                | 4.30E-28 | <b>SMID BREAST CANCER BASAL DN</b>              | 7.42E-06 | <b>PICCALUGA ANGIOIMMUNOBLASTIC LYMPHOMA UP</b>             | 5.32E-07 |
| <b>BOSCO EPITHELIAL DIFFERENTIATION MODULE</b>                                     | 6.52E-28 | MANTORIATI MDM4 TARGETS FETAL LIVER DN          | 9.26E-06 | <b>TAKEIDA TARGETS OF NUP98 HOXA9 FUSION 8D DN</b>          | 5.32E-07 |
| <b>SMID BREAST CANCER BASAL DN</b>                                                 | 1.35E-27 | ZAVARZINA CLASS 1 TRANSIENTLY INDUCED BY EGF    | 9.49E-06 | <b>PILON KLFI1 TARGETS UP</b>                               | 6.51E-07 |

Table S7: Top 20 enriched gene sets of DE genes based on the overlapping genes of both PairedFB and edgeR (or baySeq), edgeR (or baySeq) only and PairedFB only when the top 500 DEGs are considered for each method. Bolded gene sets are cancer related or HNSCC related. Underline is used to indicate the common enriched gene sets between results from DEG list of uniquely and commonly identified.

|       | Gene Set Name                                     | p-Value  | FDR      |
|-------|---------------------------------------------------|----------|----------|
| Top1  | <b>RICKMAN HEAD AND NECK CANCER F</b>             | 2.88E-72 | 1.36E-68 |
| Top2  | KUNINGER IGF1 VS PDGFB TARGETS UP                 | 2.50E-47 | 5.91E-44 |
| Top3  | YAUCH HEDGEHOG SIGNALING PARACRINE DN             | 9.79E-32 | 1.54E-28 |
| Top4  | CHEMELLO SOLEUS VS EDL MYOFIBERS UP               | 2.58E-25 | 3.05E-22 |
| Top5  | EBAUER MYOGENIC TARGETS OF PAX3 FOXO1 FUSION      | 8.62E-25 | 8.15E-22 |
| Top6  | BOSCO EPITHELIAL DIFFERENTIATION MODULE           | 2.04E-22 | 1.61E-19 |
| Top7  | REACTOME STRIATED MUSCLE CONTRACTION              | 3.01E-20 | 2.04E-17 |
| Top8  | REN ALVEOLAR RHABDOMYOSARCOMA UP                  | 5.95E-20 | 3.52E-17 |
| Top9  | SWEET LUNG CANCER KRAS DN                         | 2.69E-19 | 1.41E-16 |
| Top10 | EBAUER TARGETS OF PAX3 FOXO1 FUSION UP            | 3.70E-19 | 1.75E-16 |
| Top11 | <b>RICKMAN HEAD AND NECK CANCER E</b>             | 7.07E-19 | 3.04E-16 |
| Top12 | HUMMERICH SKIN CANCER PROGRESSION DN              | 3.94E-18 | 1.55E-15 |
| Top13 | ACEVEDO FGFR1 TARGETS IN PROSTATE CANCER MODEL DN | 2.35E-17 | 8.56E-15 |
| Top14 | REACTOME MUSCLE CONTRACTION                       | 4.87E-17 | 1.64E-14 |
| Top15 | <b>CROMER TUMORIGENESIS DN</b>                    | 1.02E-16 | 3.20E-14 |
| Top16 | SABATES COLORECTAL ADENOMA DN                     | 2.96E-15 | 8.74E-13 |
| Top17 | DODD NASOPHARYNGEAL CARCINOMA UP                  | 5.62E-15 | 1.56E-12 |
| Top18 | MARTINEZ TP53 TARGETS UP                          | 3.96E-14 | 1.04E-11 |
| Top19 | DELASERNA MYOD TARGETS UP                         | 6.85E-14 | 1.70E-11 |
| Top20 | BOQUEST STEM CELL UP                              | 1.60E-13 | 3.79E-11 |

Table S8: Top 20 enriched gene sets of the biologically significant DEG list (180 genes) from PairedFB with mean fold change exceeding 4 and nominal FDR controlled at 0.05. Bolded gene sets are OSCC or HNSCC related. P-value is calculated for the Fisher's exact test for association and FDR adjusts for multiple testing for all the curated gene sets considered.

|       | Gene Set Name                                     | p-Value  | FDR      |
|-------|---------------------------------------------------|----------|----------|
| Top1  | <b>RICKMAN HEAD AND NECK CANCER F</b>             | 2.02E-70 | 9.55E-67 |
| Top2  | SMID BREAST CANCER NORMAL LIKE UP                 | 3.09E-65 | 7.30E-62 |
| Top3  | SWEET LUNG CANCER KRAS DN                         | 1.62E-63 | 2.56E-60 |
| Top4  | BOQUEST STEM CELL CULTURED VS FRESH UP            | 8.05E-62 | 9.52E-59 |
| Top5  | NABA MATRISOME                                    | 3.08E-49 | 2.91E-46 |
| Top6  | LIU PROSTATE CANCER DN                            | 3.42E-47 | 2.70E-44 |
| Top7  | BOQUEST STEM CELL UP                              | 1.63E-45 | 1.10E-42 |
| Top8  | DODD NASOPHARYNGEAL CARCINOMA UP                  | 2.60E-45 | 1.53E-42 |
| Top9  | SMID BREAST CANCER LUMINAL B DN                   | 1.20E-43 | 6.31E-41 |
| Top10 | KUNINGER IGF1 VS PDGFB TARGETS UP                 | 1.63E-41 | 7.71E-39 |
| Top11 | VECCHI GASTRIC CANCER EARLY DN                    | 8.22E-41 | 3.53E-38 |
| Top12 | SMID BREAST CANCER BASAL DN                       | 2.45E-40 | 9.66E-38 |
| Top13 | WONG ADULT TISSUE STEM MODULE                     | 1.62E-39 | 5.89E-37 |
| Top14 | LEE BMP2 TARGETS UP                               | 1.44E-38 | 4.86E-36 |
| Top15 | SABATES COLORECTAL ADENOMA DN                     | 9.66E-37 | 3.04E-34 |
| Top16 | ACEVEDO FGFR1 TARGETS IN PROSTATE CANCER MODEL DN | 1.04E-36 | 3.08E-34 |
| Top17 | DELYS THYROID CANCER DN                           | 1.68E-36 | 4.66E-34 |
| Top18 | NABA CORE MATRISOME                               | 2.38E-34 | 6.25E-32 |
| Top19 | CUI TCF21 TARGETS 2 DN                            | 7.11E-33 | 1.77E-30 |
| Top20 | MEISSNER BRAIN HCP WITH H3K4ME3 AND H3K27ME3      | 2.01E-32 | 4.76E-30 |

Table S9: Top 20 enriched gene sets of the biologically significant genes (634 genes) from edgeR with mean fold change exceeding 4 among DEG list at nominal level 0.05. Bolded gene sets are HNSCC related. P-value is calculated for the Fisher's exact test for association and FDR adjusts for multiple testing for all the curated gene sets considered.

## References

- Abramowitz, M. and Stegun, I. A. (1964). Hypergeometric functions. In *Handbook of mathematical functions: with formulas, graphs, and mathematical tables*, volume 55, chapter 15, pages 555–566. Courier Corporation.
- Chung, L. M., Ferguson, J. P., Zheng, W., Qian, F., Bruno, V., Montgomery, R. R., and Zhao, H. (2013). Differential expression analysis for paired rna-seq data. *BMC bioinformatics*, **14**(1), 110.
- Hardcastle, T. J. and Kelly, K. A. (2013). Empirical bayesian analysis of paired high-throughput sequencing data with a beta-binomial distribution. *BMC bioinformatics*, **14**(1), 135.
- Jones, M. (2004). The minimax distribution: a beta-type distribution with some tractability advantages.
- Robinson, M. D. and Oshlack, A. (2010). A scaling normalization method for differential expression analysis of rna-seq data. *Genome biology*, **11**(3), 1.
- Tuch, B. B., Laborde, R. R., Xu, X., Gu, J., Chung, C. B., Monighetti, C. K., Stanley, S. J., Olsen, K. D., Kasperbauer, J. L., Moore, E. J., *et al.* (2010). Tumor transcriptome sequencing reveals allelic expression imbalances associated with copy number alterations. *PloS one*, **5**(2), e9317.
- Van De Wiel, M. A., Leday, G. G., Pardo, L., Rue, H., Van Der Vaart, A. W., and Van Wieringen, W. N. (2013). Bayesian analysis of rna sequencing data by estimating multiple shrinkage priors. *Biostatistics*, **14**(1), 113–128.
- Yu, Y.-H., Kuo, H.-K., and Chang, K.-W. (2008). The evolving transcriptome of head and neck squamous cell carcinoma: a systematic review. *PLoS One*, **3**(9), e3215.
